# Supplementary material
Source: PubMed Central journal article supplement (PMC3905105)

## Supporting Information

### Table of Contents

|                                           |     |
|-------------------------------------------|-----|
| I. General experimental information       | S1  |
| II. Synthesis of cyclization substrates   | S1  |
| III. Cyclization of vinyl and aryl azides | S6  |
| IV. Azirine trapping experiments          | S9  |
| V. References                             | S11 |

### I. General experimental information

Dichloromethane, tetrahydrofuran, diethyl ether, toluene, and acetonitrile were dried by passage through columns of activated alumina. HPLC grade  $\text{CHCl}_3$  was washed with 1 M NaOH and deionized  $\text{H}_2\text{O}$ , passed through a column of activated, basic Brockmann I  $\text{Al}_2\text{O}_3$ , and fractionally distilled from  $\text{K}_2\text{CO}_3$  immediately prior to use. Irradiations were performed using a 1 W blue light-emitting diode (LED) strip ( $\lambda = 465\text{--}470$  nm) purchased from Creative Lighting Solutions. Chromatography was performed with Purasil 60 Å silica gel (230–400 mesh).  $^1\text{H}$  and  $^{13}\text{C}$  NMR data for all previously uncharacterized compounds were obtained using Varian Inova-500 and Bruker-500 spectrometers and are referenced to TMS (0.00 ppm) or residual protio solvent signal. IR spectral data were obtained using a Bruker Vector 22 spectrometer (thin film on NaCl). Melting points were obtained using a Mel-Temp II (Laboratory Devices, Inc., USA) melting point apparatus. Mass spectrometry was performed with a Micromass LCT (electrospray ionization, time-of-flight analyzer or electron impact). These facilities are funded by the NSF (CHE-9974839, CHE-9304546) and the University of Wisconsin.

The catalyst complexes  $\text{Ru}(\text{dtbbpy})_3(\text{PF}_6)_2^1$  and  $[\text{Ir}(\text{dF}(\text{CF}_3)\text{ppy})_2(\text{dtbbpy})](\text{PF}_6)_2^2$  were prepared according to literature procedures. Compounds **5a**, **5b**, **5c**, **5d**, and **8** were prepared as described by Seeberger,<sup>3</sup> and compound **5l** was prepared according to a procedure reported by Driver.<sup>4</sup> Compounds **12** and **13** were prepared according to Lemos<sup>5</sup> and Gilchrist<sup>6</sup>, respectively.

### II. Synthesis of cyclization substrates

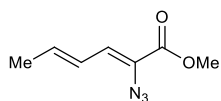

**(2Z,4E)-Methyl 2-azidohepta-2,4-dienoate (1)**. Prepared using a modification of the procedure reported by Driver.<sup>7</sup> To a 100 mL round bottomed flask that had been flame-dried under high vacuum and purged with  $\text{N}_2$  was added THF (14 mL) and hexamethyldisilazane (4.84 g, 30.0 mmol). The mixture was cooled to 0 °C after which *sec*-BuLi (24.0 mL of a

1.37 M solution in cyclohexane, 32.8 mmol) was added slowly. (Note: we found that use of *n*-BuLi led to formation of significant amounts of the butyl ester ((2Z,4E)-butyl 2-azidohepta-2,4-dienoate), and purification of the desired product away from the butyl ester derivative was very difficult). To ensure quantitative deprotonation, the reaction was stirred at 0 °C for an additional 10 min and thereafter cooled to –78 °C. After 10 min at –78 °C, a solution of freshly distilled crotonaldehyde (2.00 g, 28.5 mmol) in methyl azidoacetate (13.1 g, 114.1 mmol) was added dropwise over 1 h. Throughout the addition, a thick, dark sludge formed and continuous, vigorous stirring was required to achieve acceptable yields. Subsequently, the reaction was warmed to –10 °C and stirred until complete

consumption of crotonaldehyde was observed (2 h). Thereafter, the mixture was warmed to rt and stirred for 2 h. At this time, the reaction was diluted with Et<sub>2</sub>O (20 mL) and quenched via the slow addition of H<sub>2</sub>O (20 mL). The organic layer was separated, and the aqueous layer was extracted with Et<sub>2</sub>O (2 x 30 mL). The organic layers were combined and washed with H<sub>2</sub>O (2 x 30 mL), brine (1 x 30 mL), dried over Na<sub>2</sub>SO<sub>4</sub>, filtered, and the volatiles were removed *in vacuo* to give a brown oil that was purified via flash column chromatography using a solvent gradient (99:1 to 24:1 hexanes:EtOAc) to afford the product (1.45 g, 8.66 mmol, 30% yield) as a pale yellow oil. Spectral data were in complete agreement with reported values.<sup>7</sup>

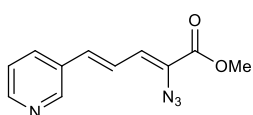

**(2Z,4E)-Methyl 2-azido-5-(pyridin-3-yl)penta-2,4-dienoate (5e).** Prepared according to the procedure of Seeberger.<sup>3</sup> A flame-dried 50 mL round bottomed flask under an atmosphere of N<sub>2</sub> was charged with *trans*-3-(3-pyridyl)acrolein (500 mg, 3.76 mmol), dry MeOH (5.3 mL), and methyl azidoacetate (1080 mg, 9.39 mmol). The solution was cooled to -15 °C, and after 10 min, a solution of NaOMe (freshly prepared from 216 mg Na (9.39 mmol) in 5.3 mL MeOH) was added dropwise over 20 min. The reaction was stirred at -15 °C for an additional 90 min, then slowly warmed to 4 °C and stirred for 12 h. Subsequently, the heterogeneous mixture was poured into ice-cold saturated aqueous NH<sub>4</sub>Cl (15 mL). The resulting precipitate was isolated on a fritted funnel and washed with deionized H<sub>2</sub>O until the filtrate came through clear. The beige solid was dissolved in CH<sub>2</sub>Cl<sub>2</sub> and dried over Na<sub>2</sub>SO<sub>4</sub>. The organic solution was filtered, and the volatiles were removed *in vacuo* to give a residue that was purified by flash column chromatography using a solvent gradient (1:1 to 1:2 hexanes:EtOAc) to afford the title compound (455 mg, 1.98 mmol, 52% yield) as a pale yellow solid (mp = 99.7–100.4 °C). IR (neat) 2115, 1705, 1598, 1438, 1374, 1248, 971 cm<sup>-1</sup>. <sup>1</sup>H NMR: (500.2 MHz, CDCl<sub>3</sub>) δ 8.66 (d, *J* = 1.8 Hz, 1H), 8.52 (dd, *J* = 4.8, 1.6 Hz, 1H), 7.82 (app dt, *J* = 8.0, 1.8 Hz, 1H), 7.29 (dd, *J* = 8.1, 4.9 Hz, 1H), 7.22 (dd, *J* = 15.9, 11.2 Hz, 1H), 6.78 (d, *J* = 15.9 Hz, 1H), 6.74 (dd, *J* = 11.2, 0.9 Hz, 1H), 3.89 (s, 3H); <sup>13</sup>C NMR: (125.8 MHz, CDCl<sub>3</sub>) δ 163.4, 149.7, 149.2, 134.8, 133.1, 132.1, 126.7, 125.9, 124.1, 123.6, 52.8; HRMS (EI) calculated for [C<sub>11</sub>H<sub>10</sub>N<sub>4</sub>O<sub>2</sub>]<sup>+</sup> requires *m/z* 230.0804, found *m/z* 202.0737 ([M-N<sub>2</sub>]<sup>+</sup>, requires *m/z* 202.0742).

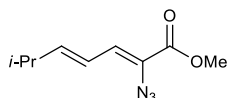

**(2Z,4E)-Methyl 2-azido-6-methylhepta-2,4-dienoate (5f).** Prepared in a similar manner to (2Z,4E)-methyl 2-azidohexa-2,4-dienoate **1** using (*E*)-4-methylpent-2-enal (980 mg, 10.0 mmol),<sup>8</sup> methyl azidoacetate (4.60 g, 40.0 mmol), hexamethyldisilazane (1.69 g, 10.5 mmol), *sec*-BuLi (8.38 mL of a 1.37 M solution in cyclohexane, 11.5 mmol), and THF (5.0 mL). Purified via flash column chromatography using a solvent gradient (99:1 to 24:1 hexanes:EtOAc) to afford the product (683 mg, 3.50 mmol, 35% yield) as a pale yellow oil. IR (neat) 2122, 1714, 1673, 1374, 1271, 1231 cm<sup>-1</sup>. <sup>1</sup>H NMR: (500.2 MHz, CDCl<sub>3</sub>) δ 6.58 (d, *J* = 11.0 Hz, 1H), 6.39 (ddd, *J* = 15.4, 11.2, 1.4 Hz, 1H), 6.04 (ddd, *J* = 15.4, 6.8, 0.7 Hz, 1H), 3.84 (s, 3H), 2.44 (d of septets, *J* = 6.8, 1.3 Hz, 1H), 1.05 (d, *J* = 6.8 Hz, 6H); <sup>13</sup>C NMR: (125.8 MHz, CDCl<sub>3</sub>) δ 162.8, 149.6, 127.0, 122.8, 120.4, 51.5, 30.8, 20.8; HRMS (EI) calculated for [C<sub>9</sub>H<sub>13</sub>N<sub>3</sub>O<sub>2</sub>]<sup>+</sup> requires *m/z* 195.1008, found *m/z* 167.0941 ([M-N<sub>2</sub>]<sup>+</sup>, requires *m/z* 167.0946).

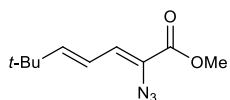

**(2Z,4E)-Methyl 2-azido-6,6-dimethylhepta-2,4-dienoate (5g).** Prepared in a similar manner to (2Z,4E)-methyl 2-azidohexa-2,4-dienoate **1** using (*E*)-4,4-dimethylpent-2-enal (650 mg, 5.79 mmol),<sup>8</sup> methyl azidoacetate (2.67 g, 23.2 mmol), hexamethyldisilazane (0.982 g, 6.08 mmol), *sec*-BuLi (4.86 mL of a 1.37 M solution in cyclohexane, 6.66 mmol), and THF (2.9 mL). Purified via flash column chromatography using a solvent gradient (99:1 to 24:1 hexanes:EtOAc) to afford the product (376 mg, 1.79 mmol, 31% yield) as a pale yellow oil. IR (neat) 2126, 1717, 1689, 1498, 1442, 1239 cm<sup>-1</sup>. <sup>1</sup>H NMR: (500.2 MHz, CDCl<sub>3</sub>) δ 6.59 (dd, *J* = 11.0, 0.5 Hz, 1H), 6.36 (dd, *J* = 15.5, 10.9 Hz, 1H), 6.07 (dd, *J* = 15.5, 0.6 Hz, 1H), 3.84 (s, 3H), 1.07 (s, 9H); <sup>13</sup>C NMR: (125.8 MHz, CDCl<sub>3</sub>) δ 162.8, 153.4, 127.3, 122.9, 118.3, 51.5, 33.2, 28.1; HRMS (EI) calculated for [C<sub>10</sub>H<sub>15</sub>N<sub>3</sub>O<sub>2</sub>] requires *m/z* 209.1164, found *m/z* 209.1159.

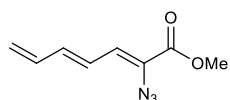

**(2Z,4E)-Methyl 2-azidohepta-2,4,6-trienoate (5h).** A flame-dried 50 mL round bottomed flask under an atmosphere of N<sub>2</sub> was charged with (*E*)-penta-2,4-dienal (600 mg, 7.31

mmol),<sup>9</sup> dry MeOH (10.3 mL), and methyl azidoacetate (2103 mg, 18.3 mmol). The solution was cooled to  $-15\text{ }^{\circ}\text{C}$ , and after 10 min, a solution of NaOMe (freshly prepared from 420 mg Na (18.3 mmol) in 10.3 mL MeOH) was added dropwise over 20 min. The reaction was stirred at  $-15\text{ }^{\circ}\text{C}$  for an additional 90 min, then slowly warmed to  $4\text{ }^{\circ}\text{C}$  and stirred for 12 h. Subsequently, the heterogeneous mixture was poured into ice-cold saturated aqueous  $\text{NH}_4\text{Cl}$  (25 mL) and extracted with EtOAc (3 x 40 mL). The organic layer was dried over  $\text{Na}_2\text{SO}_4$ , filtered, and the volatiles were removed *in vacuo*. The resulting residue was purified via flash column chromatography (99:1 hexanes:EtOAc) to afford the trienyl azide (458 mg, 2.56 mmol, 35% yield) as a yellow oil that was used immediately. IR (neat) 2124, 1714, 1684, 1438, 1368, 1234  $\text{cm}^{-1}$ .  $^1\text{H}$  NMR: (499.8 MHz,  $\text{C}_6\text{D}_6$ )  $\delta$  6.56 (ddd,  $J = 14.9, 11.4, 0.5$  Hz, 1H), 6.46 (d,  $J = 11.4$  Hz, 1H), 6.19 (dtd,  $J = 17.0, 10.8, 0.5$  Hz, 1H), 6.07 (ddd,  $J = 14.7, 10.9, 0.5$  Hz, 1H), 5.07 (ddd,  $J = 16.9, 1.4$  Hz, 1H), 4.99 (dd,  $J = 10.8, 1.3$  Hz, 1H), 3.25 (s, 3H);  $^{13}\text{C}$  NMR: (125.7 MHz,  $\text{C}_6\text{D}_6$ )  $\delta$  162.9, 139.3, 136.7, 126.6, 126.1, 125.9, 120.7, 51.7; HRMS (EI) calculated for  $[\text{C}_8\text{H}_9\text{N}_3\text{O}_2]^+$  requires  $m/z$  179.0695, found  $m/z$  151.0628 ( $[\text{M}-\text{N}_2]^+$ , requires  $m/z$  151.0633).

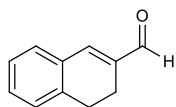

**3,4-Dihydronaphthalene-2-carbaldehyde (S1).** Prepared according to the procedure of Mock and Tsou.<sup>10</sup> To a 250 mL round bottomed flask that had been flame-dried under high vacuum and purged with  $\text{N}_2$  was added distilled triethyl orthoformate (6.72 g, 45.4 mmol), which was then cooled to  $-30\text{ }^{\circ}\text{C}$ . Subsequently, a solution of  $\text{BF}_3 \cdot \text{Et}_2\text{O}$  (7.73 g, 54.5 mmol) in  $\text{CH}_2\text{Cl}_2$  (23 mL) was added dropwise over 20 min. The resulting slurry was stirred at  $-30\text{ }^{\circ}\text{C}$  for an additional 5 min then warmed to  $0\text{ }^{\circ}\text{C}$  for 15 min. The solution was thereafter cooled to  $-78\text{ }^{\circ}\text{C}$  and  $\alpha$ -tetralone (3.32 g, 22.7 mmol) was added dropwise over 5 min followed by dropwise addition of diisopropylethylamine (8.80 g, 68.1 mmol) over 30 min. The reaction was then warmed to  $-20\text{ }^{\circ}\text{C}$  and stirred for 30 min and slowly warmed to  $-10\text{ }^{\circ}\text{C}$  over 90 min. Thereafter, the reaction was poured into saturated aqueous  $\text{NaHCO}_3$  (250 mL) and  $\text{CH}_2\text{Cl}_2$  (150 mL) was added followed by vigorous stirring for 10 min. The resulting layers were separated, and the organic layer was washed with cold, 0.5 M  $\text{H}_2\text{SO}_4$  (1 x 50 mL) and cold  $\text{H}_2\text{O}$  (1 x 50 mL) and dried over  $\text{Na}_2\text{SO}_4$ . The organic layer was filtered, and the volatiles were removed *in vacuo* to afford a viscous, orange oil that was purified by Kugelrohr distillation (0.05 Torr,  $200\text{ }^{\circ}\text{C}$  glass oven temperature) to give 2-(diethoxymethyl)-3,4-dihydronaphthalen-1(2H)-one (5.24 g, 21.1 mmol, 93% yield) as a clear oil whose spectral data matched the reported literature values.<sup>11</sup> A dry 250 mL round bottomed flask equipped with an addition funnel was charged with 2-(diethoxymethyl)-3,4-dihydronaphthalen-1(2H)-one (3.20 g, 12.9 mmol) and EtOH (25 mL). The mixture was cooled to  $0\text{ }^{\circ}\text{C}$ , and then a solution of  $\text{NaBH}_4$  (1.71 g, 45.1 mmol) in EtOH (55 mL) was added dropwise over 10 min. The reaction was heated to  $80\text{ }^{\circ}\text{C}$  and stirred for 30 min. Thereafter, the mixture was cooled to  $0\text{ }^{\circ}\text{C}$  and 6 M HCl was added dropwise over 20 min until  $\text{H}_2$  evolution had ceased and the solution achieved a pH of 1. Subsequently, the reaction was heated to  $80\text{ }^{\circ}\text{C}$  and stirred for 4 h. At this time, the solution was cooled to rt and poured into brine (300 mL). EtOAc (150 mL) was added, and the organic layer was separated and washed with brine (1 x 50 mL), dried over  $\text{Na}_2\text{SO}_4$ , filtered, and the volatiles were removed *in vacuo* to afford a crude orange oil. Purification by flash-column chromatography on silica (9:1 hexanes:EtOAc) afforded the carbaldehyde (682 mg, 4.31 mmol, 33% yield over two steps) as a pale yellow oil. Spectral data were in complete agreement with previously reported values.<sup>12</sup>

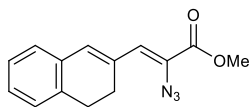

**(Z)-Methyl 2-azido-3-(3,4-dihydronaphthalen-2-yl)acrylate (5i).** Prepared in a similar manner to (2Z,4E)-methyl 2-azido-5-(pyridin-3-yl)penta-2,4-dienoate **5e** using 3,4-dihydronaphthalene-2-carbaldehyde **S1** (600 mg, 3.79 mmol), MeOH (5.3 mL), methyl azidoacetate (1091 mg, 9.49 mmol), and a solution of NaOMe (prepared from 218 mg Na (9.48 mmol) in 5.3 mL MeOH). The resulting residue was purified by flash-column chromatography using a solvent gradient (9:1 to 7:1 hexanes:EtOAc) to afford the title compound (534 mg, 2.09 mmol, 55% yield) as a pale yellow solid (mp =  $62.6\text{--}64.0\text{ }^{\circ}\text{C}$ ). IR (neat) 2122, 1717, 1672, 1354, 1231  $\text{cm}^{-1}$ .  $^1\text{H}$  NMR: (499.8 MHz,  $\text{CDCl}_3$ )  $\delta$  7.14 (m, 4H), 6.88 (s, 1H), 6.66 (s, 1H), 3.88 (s, 3H), 2.85 (m, 2H), 2.80 (m, 2H);  $^{13}\text{C}$  NMR: (125.7 MHz,  $\text{CDCl}_3$ )  $\delta$  164.3, 136.0, 135.0, 134.8, 133.8, 128.5, 127.8, 127.4, 126.7, 123.9, 52.9, 27.9, 25.6; HRMS (EI) calculated for  $[\text{C}_{14}\text{H}_{13}\text{N}_3\text{O}_2]^+$  requires  $m/z$  255.1003, found  $m/z$  255.1002.

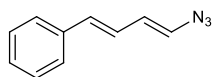

**((1E,3E)-4-azidobuta-1,3-dien-1-yl)benzene (5j).** Prepared according to the procedure of Guo.<sup>13</sup> A 25 mL round bottomed flask was charged with anhydrous CuSO<sub>4</sub> (42.5 mg, 0.267 mmol) and sodium azide (208 mg, 3.19 mmol). Then MeOH (8.0 mL) was added followed immediately by ((1E,3E)-4-phenylbuta-1,3-dien-1-yl)boronic acid (463 mg, 2.66 mmol).<sup>14</sup> The heterogeneous brown solution was vigorously stirred open to the atmosphere for 18 h. Thereafter, the volatiles were removed *in vacuo*, and the crude residue was dissolved in CH<sub>2</sub>Cl<sub>2</sub> and filtered through a pad of silica (1:1 hexanes:EtOAc). The volatiles were removed *in vacuo* to give a dark yellow oil that was purified via flash column chromatography on silica (20:1 hexanes:EtOAc) to afford the product (163 mg, 0.95 mmol, 36% yield) as a pale yellow solid (mp = 51.4–53.1 °C). IR (neat) 2102, 1346, 1264, 976, 907 cm<sup>-1</sup>. <sup>1</sup>H NMR: (500.2 MHz, CDCl<sub>3</sub>) δ 7.41–7.36 (m, 2H), 7.35–7.29 (m, 2H), 7.26–7.20 (m, 1H), 6.70 (ddd, *J* = 15.4, 10.9, 0.6 Hz, 1H), 6.49 (dd, *J* = 15.6, 0.7 Hz, 1H), 6.25 (dd, *J* = 13.3, 0.7 Hz, 1H), 6.12 (ddd, *J* = 13.2, 10.8, 0.8 Hz, 1H); <sup>13</sup>C NMR: (125.8 MHz, CDCl<sub>3</sub>) δ 137.1, 131.5, 129.1, 128.7, 127.5, 126.1, 124.9, 120.7; HRMS (EI) calculated for [C<sub>10</sub>H<sub>9</sub>N<sub>3</sub>]<sup>+</sup> requires *m/z* 171.0796, found *m/z* 143.0730 ([M-N<sub>2</sub>]<sup>+</sup>, requires *m/z* 143.0735).

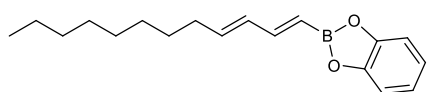

**2-((1E,3E)-Dodeca-1,3-dien-1-yl)benzo[d][1,3,2]dioxaborole (S2).** To a 25 mL round bottomed flask with a stir bar that had been flame-dried under high vacuum and purged with N<sub>2</sub> was added (*E*)-dodec-3-en-1-yne (1.39 g, 8.46 mmol).<sup>15,16</sup> To the stirred compound was added freshly distilled catecholborane<sup>17</sup> (1.02 g, 8.46 mmol) over 5 min. Thereafter, the reaction was heated to 70 °C and stirred for 3 h, resulting in the formation of a dark brown oil. After cooling the mixture to rt, the crude oil was purified by Kugelrohr distillation at 0.05 Torr (impurity collected at 50–80 °C, product distilled at 132 °C) to afford the title compound (1.74 g, 6.12 mmol, 72% yield) as a clear oil. IR (neat) 2937, 2856, 2379, 2345, 1649, 1455, 1136, 1002 cm<sup>-1</sup>. <sup>1</sup>H NMR: (500.2 MHz, CDCl<sub>3</sub>) δ 7.34 (dd, *J* = 17.7, 10.4 Hz, 1H), 7.21 (app dd, *J* = 5.8, 3.3 Hz, 2H), 7.07 (app dd, *J* = 5.8, 3.3 Hz, 2H), 6.26 (dd, *J* = 15.2, 10.5 Hz, 1H), 6.06 (dt, *J* = 14.7, 7.1 Hz, 1H), 5.75 (d, *J* = 17.7 Hz, 1H), 2.17 (dt, *J* = 7.9, 7.7 Hz, 2H), 1.44 (tt, *J* = 7.9, 7.6 Hz, 2H), 1.29 (m, 10H), 0.89 (t, *J* = 6.8 Hz, 3H); <sup>13</sup>C NMR: (125.8 MHz, CDCl<sub>3</sub>) δ 152.9, 148.3, 142.0, 132.1, 122.5, 112.2, 32.8, 31.8, 29.4, 29.2, 28.9, 22.7, 14.1; HRMS (EI) calculated for [C<sub>18</sub>H<sub>25</sub>BO<sub>2</sub>]<sup>+</sup> requires *m/z* 284.1948, found *m/z* 284.1979.

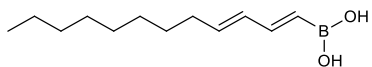

**(1E,3E)-Dodeca-1,3-dien-1-ylboronic acid (S3).** A 50 mL round bottomed flask was charged with 2-((1E,3E)-dodeca-1,3-dien-1-yl)benzo[d][1,3,2]dioxaborole **S2** (1.74 g, 6.12 mmol). Cold H<sub>2</sub>O (29.2 mL) was added over 5 min, and the resulting heterogeneous mixture was vigorously stirred at rt for 2 h. The white precipitate that formed was isolated on a 15 mL medium fritted glass funnel, washed with copious H<sub>2</sub>O, and air-dried for 15 min to afford the title compound (1.10 g, 5.25 mmol, 86% yield) as a white solid (mp = 88.3–90.2 °C). IR (neat) 2927, 2853, 2360, 2344, 1648, 1455, 1136, 1001 cm<sup>-1</sup>. <sup>1</sup>H NMR: (500.2 MHz, (CD<sub>3</sub>)<sub>2</sub>CO) δ 6.95 (dd, *J* = 17.6, 10.3 Hz, 1H), 6.66 (s, 2H), 6.13 (ddd, *J* = 15.1, 10.3, 0.7 Hz, 1H), 5.84 (dt, *J* = 14.7, 7.2 Hz, 1H), 5.44 (d, *J* = 17.6 Hz, 1H), 2.11 (dtd, *J* = 7.7, 7.3, 1.1 Hz, 2H), 1.41 (tt, *J* = 7.9, 7.5 Hz, 2H), 1.30 (m, 10H), 0.88 (t, *J* = 6.9 Hz, 3H); <sup>13</sup>C NMR: (125.8 MHz, (CD<sub>3</sub>)<sub>2</sub>CO) δ 149.3, 139.3, 134.6, 34.1, 33.5, 30.8, 30.7, 24.2, 15.2; HRMS (EI) calculated for [C<sub>12</sub>H<sub>23</sub>BO<sub>2</sub>]<sup>+</sup> requires *m/z* 210.1791, found *m/z* 210.1779.

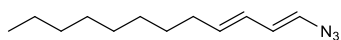

**(1E,3E)-1-Azidododeca-1,3-diene (5k).** A 25 mL round bottomed flask was charged with anhydrous CuSO<sub>4</sub> (76.6 mg, 0.480 mmol) and sodium azide (374 mg, 5.76 mmol). Then MeOH (14.4 mL) was added followed immediately by (1E,3E)-dodeca-1,3-dien-1-ylboronic acid **S3** (1009 mg, 4.80 mmol). The heterogeneous brown solution was stirred vigorously open to the atmosphere for 12 h. Thereafter, the volatiles were removed *in vacuo* and the crude residue was dissolved in CH<sub>2</sub>Cl<sub>2</sub> and filtered through a pad of silica (1:1 hexanes:EtOAc). The volatiles were removed *in vacuo* and the residue was purified via flash column chromatography on silica (hexanes) to afford the title compound (318 mg, 1.53 mmol, 32% yield) as a pale yellow oil. IR (neat) 2102, 1651, 1611, 1457, 972 cm<sup>-1</sup>. <sup>1</sup>H NMR: (499.8 MHz, C<sub>6</sub>D<sub>6</sub>) δ 5.85 (dd, *J* = 13.2, 11.0 Hz, 1H), 5.75 (ddt, *J* = 15.0, 10.8, 1.3 Hz, 1H), 5.45 (d, *J* = 13.2 Hz, 1H), 5.39 (dt, *J* = 14.6, 7.1 Hz, 1H), 1.96

(dtd,  $J = 7.9, 7.3, 1.3$  Hz, 2H), 1.27 (m, 12H), 0.91 (t,  $J = 6.9$  Hz, 3H);  $^{13}\text{C}$  NMR: (125.7 MHz,  $\text{C}_6\text{D}_6$ )  $\delta$  133.9, 126.7, 126.4, 120.6, 32.8, 32.0, 29.6, 29.4, 29.3, 29.3, 22.8, 14.1; HRMS (EI) calculated for  $[\text{C}_{12}\text{H}_{21}\text{N}_3]^+$  requires  $m/z$  207.1735, found  $m/z$  179.1669 ( $[\text{M}-\text{N}_2]^+$ , requires  $m/z$  179.1674).

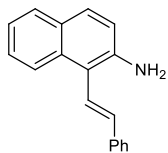

**(E)-1-Styrylnaphthalen-2-amine (S4).** To a 100 mL round bottomed flask was added 1-bromonaphthalen-2-amine (500 mg, 2.25 mmol),<sup>18</sup> *trans*-2-phenylvinylboronic acid (500 mg, 3.38 mmol),  $\text{K}_2\text{CO}_3$  (1245 mg, 9.01 mmol), and  $\text{Pd}(\text{PPh}_3)_4$  (260 mg, 0.225 mmol). The system was equipped with a reflux condenser, evacuated, and purged with  $\text{N}_2$  before adding toluene (23 mL), EtOH (9 mL), and  $\text{H}_2\text{O}$  (4.5 mL). The reaction was heated to 100 °C and refluxed for 72 h.

Thereafter, the reaction was cooled to rt and diluted with  $\text{H}_2\text{O}$  (30 mL) and  $\text{CH}_2\text{Cl}_2$  (30 mL). The organic layer was separated, and the aqueous layer was extracted with  $\text{CH}_2\text{Cl}_2$  (2 x 30 mL). The combined organic layers were washed with  $\text{H}_2\text{O}$  (1 x 30 mL) and brine (1 x 30 mL), dried over  $\text{Na}_2\text{SO}_4$ , filtered, and concentrated *in vacuo*. The crude residue was purified via flash column chromatography on silica using a solvent gradient (20:1 to 10:1 hexanes:EtOAc) to afford the title compound (359 mg, 1.46 mmol, 65% yield) as a bright yellow solid (mp = 74.9–76.5 °C). IR (neat) 3448, 3377, 3055, 3023, 2361, 2339, 1618, 1512, 1394, 1280, 1146  $\text{cm}^{-1}$ .  $^1\text{H}$  NMR: (500.0 MHz,  $\text{CDCl}_3$ )  $\delta$  7.92 (d,  $J = 8.6$  Hz, 1H), 7.71 (d,  $J = 8.0$  Hz, 1H), 7.62 (d,  $J = 8.6$  Hz, 1H), 7.60 (m, 2H), 7.40 (m, 4H), 7.32 (tt,  $J = 7.2, 1.2$  Hz, 1H), 7.25 (td,  $J = 8.1, 1.2$  Hz, 1H), 7.00 (d,  $J = 8.8$  Hz, 1H), 6.97 (d,  $J = 16.8$  Hz, 1H), 4.13 (s, 2H);  $^{13}\text{C}$  NMR: (125.7 MHz,  $\text{CDCl}_3$ )  $\delta$  141.5, 137.4, 135.2, 133.2, 128.8, 128.7, 128.3, 128.2, 127.8, 126.5, 126.3, 123.7, 123.4, 122.4, 118.4, 115.3; HRMS (EI) calculated for  $[\text{C}_{18}\text{H}_{16}\text{N}_3]^+$  requires  $m/z$  246.1278, found  $m/z$  246.1282.

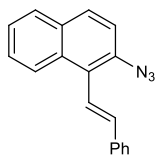

**(E)-2-Azido-1-styrylnaphthalene (5m).** To a 100 mL round bottomed flask was added (*E*)-1-styrylnaphthalen-2-amine (S4) (200 mg, 0.815 mmol) followed by  $\text{H}_2\text{O}$  (4.5 mL) and glacial AcOH (4.5 mL). The heterogeneous mixture was cooled to 0 °C and allowed to stir for 10 min before adding  $\text{NaNO}_2$  (78.8 mg, 1.14 mmol) in a single portion. The resulting dark orange mixture was stirred at 0 °C for 1 h. Subsequently,  $\text{NaN}_3$  (79.4 mg, 1.22 mmol) was added portionwise over 3 min and the resulting yellow solution was warmed to rt and stirred for 45 min. The reaction was diluted with  $\text{H}_2\text{O}$  (30 mL) and  $\text{Et}_2\text{O}$  (30 mL) and transferred to a 250 mL Erlenmeyer flask with a large stir bar. The solution was vigorously stirred while solid  $\text{Na}_2\text{CO}_3$  was added until pH ~ 7. The organic layer was separated and the aqueous layer was extracted with  $\text{Et}_2\text{O}$  (2 x 30 mL). The organic layers were combined and washed with  $\text{H}_2\text{O}$  (2 x 20 mL) and brine (1 x 20 mL) before being dried over  $\text{Na}_2\text{SO}_4$ . The volatiles were removed *in vacuo* and the residue was purified via flash column chromatography on silica using a solvent gradient (50:1 to 25:1 hexanes:EtOAc) to afford the title compound (139 mg, 0.512 mmol, 63% yield) as an off-white solid (mp = 95.5–96.1 °C). IR (thin film) 3081, 3061, 2953, 2327, 2111, 2051, 1640, 1619, 1598, 1299  $\text{cm}^{-1}$ .  $^1\text{H}$  NMR: (500.0 MHz,  $\text{CDCl}_3$ )  $\delta$  8.21 (d,  $J = 8.7$  Hz, 1H), 7.83 (d,  $J = 7.8$  Hz, 1H), 7.82 (d,  $J = 8.7$  Hz, 1H), 7.60 (d,  $J = 7.5$  Hz, 2H), 7.51 (td,  $J = 6.9, 1.3$  Hz, 1H), 7.43 (m, 4H), 7.37 (d,  $J = 8.8$  Hz, 1H), 7.31 (tt,  $J = 7.1, 1.3$  Hz, 1H), 7.04 (d,  $J = 16.8$  Hz, 1H);  $^{13}\text{C}$  NMR: (125.7 MHz,  $\text{CDCl}_3$ )  $\delta$  137.3, 136.4, 134.3, 132.5, 131.3, 129.1, 128.8, 128.5, 128.0, 127.1, 126.6, 125.3, 125.2, 125.1, 121.9, 117.2, HRMS (EI) calculated for  $[\text{C}_{18}\text{H}_{13}\text{N}_3]^+$  requires  $m/z$  271.1109, found  $m/z$  243.1044 ( $[\text{M}-\text{N}_2]^+$ , requires  $m/z$  243.1043).

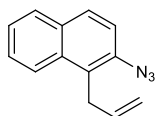

**1-Allyl-2-azidonaphthalene (15).** To a flame-dried 25 mL round bottomed flask was added 1-bromonaphthalen-2-amine (290 mg, 1.31 mmol).<sup>18</sup> The flask was equipped with a reflux condenser and the system was evacuated and purged with  $\text{N}_2$  before adding DMF (3.3 mL), allyltributylstannane (519 mg, 1.56 mmol), and  $\text{Pd}(\text{PPh}_3)_4$  (151 mg, 0.131 mmol). The mixture was heated to 85 °C and stirred for 40 h. Thereafter, the reaction was cooled to rt and diluted with  $\text{H}_2\text{O}$  (5 mL) and  $\text{Et}_2\text{O}$  (10 mL). The organic layer was separated, and the aqueous layer was extracted with  $\text{Et}_2\text{O}$  (4 x 5 mL). The combined organic layers were washed with  $\text{H}_2\text{O}$  (4 x 5 mL) and subsequently dried over  $\text{Na}_2\text{SO}_4$ . The volatiles were removed *in vacuo* and the residue was purified via flash column chromatography on silica (9:1 hexanes:EtOAc) to afford 1-allylnaphthalen-2-amine (176 mg, 0.960 mmol, 73% yield) as a pale yellow oil. To a

100 mL round bottomed flask was added 1-allylnaphthalen-2-amine (171 mg, 0.933 mmol) followed by H<sub>2</sub>O (5.2 mL) and glacial AcOH (5.2 mL). The heterogeneous mixture was cooled to 0 °C and allowed to stir for 10 min before adding NaNO<sub>2</sub> (90.1 mg, 1.31 mmol) in a single portion. The resulting dark orange mixture was stirred at 0 °C for 1 h. Subsequently, NaN<sub>3</sub> (91 mg, 1.40 mmol) was added portionwise over 3 min and the resulting yellow solution was warmed to rt and stirred for 1 h. The reaction was diluted with H<sub>2</sub>O (30 mL) and Et<sub>2</sub>O (30 mL) and transferred to a 250 mL Erlenmeyer flask with a large stir bar. The solution was vigorously stirred while solid Na<sub>2</sub>CO<sub>3</sub> was added until pH ~ 7. The organic layer was separated and the aqueous layer was extracted with Et<sub>2</sub>O (2 x 30 mL). The organic layers were combined and washed with H<sub>2</sub>O (2 x 20 mL) and brine (1 x 20 mL) before being dried over Na<sub>2</sub>SO<sub>4</sub>. The volatiles were removed *in vacuo* and the residue was purified via flash column chromatography on silica (50:1 hexanes:EtOAc) to afford the title compound (151 mg, 0.722 mmol, 77% yield) as a pale yellow oil. IR (thin film) 3081, 3061, 2953, 2327, 2111, 2051, 1640, 1619, 1598, 1299 cm<sup>-1</sup>. <sup>1</sup>H NMR: (500.0 MHz, CDCl<sub>3</sub>) δ 7.94 (d, *J* = 8.6 Hz, 1H), 7.81 (m, 2H), 7.52 (td, *J* = 6.8, 1.2 Hz, 1H), 7.43 (t, *J* = 7.8 Hz, 1H), 7.35 (d, *J* = 8.7 Hz, 1H), 6.00 (ddt, *J* = 17.3, 10.6, 6.2 Hz, 1H), 5.02 (dd, *J* = 10.3, 1.6 Hz, 1H), 4.96 (dd, *J* = 17.3, 1.6 Hz, 1H), 3.82 (d, *J* = 6.0 Hz, 2H); <sup>13</sup>C NMR: (125.7 MHz, CDCl<sub>3</sub>) δ 135.9, 134.6, 132.9, 131.2, 128.7, 128.7, 127.0, 125.2, 125.0, 124.2, 116.9, 115.7, 30.7, HRMS (EI) calculated for [C<sub>13</sub>H<sub>11</sub>N<sub>3</sub>]<sup>+</sup> requires *m/z* 209.0948, found *m/z* 209.0944.

### III. Cyclizations of vinyl and aryl azides

**General procedure for visible light sensitization of azides:** To an oven-dried 25 mL Schlenk tube with a stir bar was added the azide (0.75 mmol, 1 equiv.), Ru(dtbbpy)<sub>3</sub>(PF<sub>6</sub>)<sub>2</sub> or [Ir(dF(CF<sub>3</sub>)ppy)<sub>2</sub>(dtbbpy)](PF<sub>6</sub>) (0.0075 mmol, 0.01 equiv.), and freshly distilled CHCl<sub>3</sub> (7.5 mL, 0.1 M). The solution was submitted to three freeze-pump-thaw cycles, purged with N<sub>2</sub>, and irradiated at rt with a 1 W blue light-emitting diode (LED) strip (λ = 465–470 nm). Upon completion of the reaction, the mixture was concentrated *in vacuo*, and the crude residue was purified by flash column chromatography to afford the pure pyrrole.

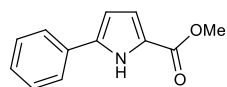

**Methyl 5-phenyl-1H-pyrrole-2-carboxylate (6a)** (Table 2, entry 1). Experiment 1: Prepared according to the General Procedure using 172 mg (0.75 mmol) of (2*Z*,4*E*)-methyl 2-azido-5-phenylpenta-2,4-dienoate **5a**,<sup>7</sup> 9.0 mg (0.0075 mmol) of Ru(dtbbpy)<sub>3</sub>(PF<sub>6</sub>)<sub>2</sub>, 7.5 mL of chloroform, and an irradiation time of 3 h. Purified by flash column chromatography on silica using a solvent gradient (7:1 to 5:1 hexanes:EtOAc) to afford 148 mg (0.74 mmol, 98% yield) of the pyrrole as a white solid. Experiment 2: 172 mg (0.75 mmol) of dienyl azide, 9.2 mg (0.0077 mmol) of Ru(dtbbpy)<sub>3</sub>(PF<sub>6</sub>)<sub>2</sub>, and 7.5 mL of chloroform. Isolated 150 mg (0.75 mmol, 99% yield). All spectral data were in complete agreement with previously reported values.<sup>7</sup>

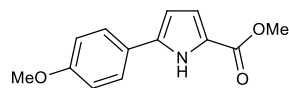

**Methyl 5-(4-methoxyphenyl)-1H-pyrrole-2-carboxylate (6b)** (Table 2, entry 2). Experiment 1: Prepared according to the General Procedure using 195 mg (0.75 mmol) of (2*Z*,4*E*)-methyl 2-azido-5-(4-methoxyphenyl)penta-2,4-dienoate **5b**,<sup>7</sup> 9.1 mg (0.0076 mmol) of Ru(dtbbpy)<sub>3</sub>(PF<sub>6</sub>)<sub>2</sub>, 7.5 mL of chloroform, and an irradiation time of 4 h. Purified by flash column chromatography on silica using a solvent gradient (4:1 to 3:1 hexanes:EtOAc) to afford 171 mg (0.74 mmol, 98% yield) of the pyrrole as a white solid. Experiment 2: 194 mg (0.75 mmol) of dienyl azide, 9.0 mg (0.0075 mmol) of Ru(dtbbpy)<sub>3</sub>(PF<sub>6</sub>)<sub>2</sub>, and 7.5 mL of chloroform. Isolated 172 mg (0.74 mmol, 99% yield). All spectral data were in complete agreement with previously reported values.<sup>7</sup>

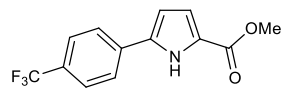

**Methyl 5-(4-(trifluoromethyl)phenyl)-1H-pyrrole-2-carboxylate (6c)** (Table 2, entry 3). Experiment 1: Prepared according to the General Procedure using 224 mg (0.75 mmol) of (2*Z*,4*E*)-methyl 2-azido-5-(4-(trifluoromethyl)phenyl)penta-2,4-dienoate **5c**,<sup>7</sup> 9.0 mg (0.0075 mmol) of Ru(dtbbpy)<sub>3</sub>(PF<sub>6</sub>)<sub>2</sub>, 7.5 mL of chloroform, and an irradiation time of 2.5 h. Purified by flash column chromatography on silica using a solvent gradient (8:1 to 6:1 hexanes:EtOAc) to afford 194 mg (0.72 mmol, 96% yield) of the pyrrole as a white solid. Experiment 2: 223 mg (0.75 mmol) of dienyl azide, 9.1 mg

(0.0076 mmol) of Ru(dtbbpy)<sub>3</sub>(PF<sub>6</sub>)<sub>2</sub>, and 7.5 mL of chloroform. Isolated 190 mg (0.71 mmol, 95% yield). All spectral data were in complete agreement with previously reported values.<sup>7</sup>

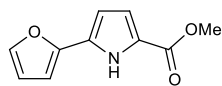

**Methyl 5-(furan-2-yl)-1H-pyrrole-2-carboxylate (6d)** (Table 2, entry 4). Experiment 1: Prepared according to the General Procedure using 164 mg (0.75 mmol) of (2*Z*,4*E*)-methyl 2-azido-5-(furan-2-yl)penta-2,4-dienoate **5d**,<sup>7</sup> 9.1 mg (0.0076 mmol) of Ru(dtbbpy)<sub>3</sub>(PF<sub>6</sub>)<sub>2</sub>, 7.5 mL of chloroform, and an irradiation time of 4 h. Purified by flash column chromatography on silica using a solvent gradient (4:1 to 3:1 hexanes:EtOAc) to afford 142 mg (0.74 mmol, 99% yield) of the pyrrole as a white solid. Experiment 2: 164 mg (0.75 mmol) of dienyl azide, 9.0 mg (0.0075 mmol) of Ru(dtbbpy)<sub>3</sub>(PF<sub>6</sub>)<sub>2</sub>, and 7.5 mL of chloroform. Isolated 138 mg (0.72 mmol, 96% yield). All spectral data were in complete agreement with previously reported values.<sup>7</sup>

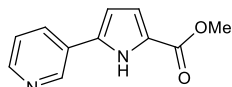

**Methyl 5-(pyridin-3-yl)-1H-pyrrole-2-carboxylate (6e)** (Table 2, entry 5). Experiment 1: Prepared according to the General Procedure using 173 mg (0.75 mmol) of (2*Z*,4*E*)-methyl 2-azido-5-(pyridin-3-yl)penta-2,4-dienoate **5e**, 9.2 mg (0.0077 mmol) of Ru(dtbbpy)<sub>3</sub>(PF<sub>6</sub>)<sub>2</sub>, 7.5 mL of chloroform, and an irradiation time of 3 h. Purified by flash column chromatography on silica using a solvent gradient (1:1 to 1:2 hexanes:EtOAc) to afford 132 mg (0.65 mmol, 87% yield) of the pyrrole as a white solid (mp = 147.9–149.4 °C). Experiment 2: 173 mg (0.75 mmol) of dienyl azide, 9.0 mg (0.0075 mmol) of Ru(dtbbpy)<sub>3</sub>(PF<sub>6</sub>)<sub>2</sub>, and 7.5 mL of chloroform. Isolated 132 mg (0.65 mmol, 86% yield). IR (neat) 3321, 2952, 1689, 1645, 1436, 1283, 1156 cm<sup>-1</sup>. <sup>1</sup>H NMR: (500.2 MHz, CDCl<sub>3</sub>) δ 9.96 (m, 1H), 8.93 (dd, *J* = 2.2, 0.7 Hz, 1H), 8.55 (dd, *J* = 4.8, 1.8 Hz, 1H), 7.89 (app dtd, *J* = 8.0, 2.2, 1.7 Hz, 1H), 7.34 (ddd, *J* = 8.0, 4.9, 0.7 Hz, 1H), 6.99 (dd, *J* = 3.9, 2.5 Hz, 1H), 6.60 (dd, *J* = 3.8, 2.7 Hz, 1H), 3.90 (s, 3H); <sup>13</sup>C NMR: (125.8 MHz, CDCl<sub>3</sub>) δ 161.8, 148.6, 146.4, 133.7, 132.0, 127.5, 124.1, 123.6, 117.0, 108.9, 51.8; HRMS (EI) calculated for [C<sub>11</sub>H<sub>10</sub>N<sub>2</sub>O<sub>2</sub>]<sup>+</sup> requires *m/z* 202.0742, found *m/z* 202.0740.

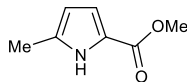

**Methyl 5-methyl-1H-pyrrole-2-carboxylate (2)** (Table 2, entry 6). Experiment 1: Prepared according to the General Procedure using 126 mg (0.75 mmol) of (2*Z*,4*E*)-methyl 2-azidohexa-2,4-dienoate **1**, 9.0 mg (0.0075 mmol) of Ru(dtbbpy)<sub>3</sub>(PF<sub>6</sub>)<sub>2</sub>, 7.5 mL of chloroform, and an irradiation time of 8 h. Purified by flash column chromatography on silica using a solvent gradient (9:1 to 7:1 hexanes:EtOAc) to afford 96 mg (0.69 mmol, 92% yield) of the pyrrole as a white solid. Experiment 2: 126 mg (0.75 mmol) of dienyl azide, 9.0 mg (0.0075 mmol) of Ru(dtbbpy)<sub>3</sub>(PF<sub>6</sub>)<sub>2</sub>, and 7.5 mL of chloroform. Isolated 99 mg (0.71 mmol, 95% yield). All spectral data were in complete agreement with previously reported values.<sup>7,19</sup>

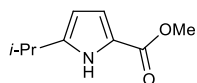

**Methyl 5-isopropyl-1H-pyrrole-2-carboxylate (6f)** (Table 2, entry 7). Experiment 1: Prepared according to the General Procedure using 146 mg (0.75 mmol) of (2*Z*,4*E*)-methyl 2-azido-6-methylhepta-2,4-dienoate **5f**, 9.0 mg (0.0075 mmol) of Ru(dtbbpy)<sub>3</sub>(PF<sub>6</sub>)<sub>2</sub>, 7.5 mL of chloroform, and an irradiation time of 11 h. Purified by flash column chromatography on silica using a solvent gradient (9:1 to 7:1 hexanes:EtOAc) to afford 111 mg (0.66 mmol, 89% yield) of the pyrrole as a white solid (mp = 59.8–61.8 °C). Experiment 2: 147 mg (0.75 mmol) of dienyl azide, 9.0 mg (0.0075 mmol) of Ru(dtbbpy)<sub>3</sub>(PF<sub>6</sub>)<sub>2</sub>, and 7.5 mL of chloroform. Isolated 112 mg (0.67 mmol, 89% yield). IR (neat) 3311, 2956, 1682, 1496, 1221, 1158 cm<sup>-1</sup>. <sup>1</sup>H NMR: (500.2 MHz, CDCl<sub>3</sub>) δ 9.10 (br s, 1H), 6.83 (dd, *J* = 3.6, 2.5 Hz, 1H), 5.98 (m, 1H), 3.83 (s, 3H), 2.96 (septet, *J* = 6.8 Hz, 1H), 1.28 (d, *J* = 6.8 Hz, 6H); <sup>13</sup>C NMR: (125.8 MHz, CDCl<sub>3</sub>) δ 161.9, 144.8, 120.8, 115.9, 106.1, 51.3, 27.4, 22.3; HRMS (EI) calculated for [C<sub>9</sub>H<sub>13</sub>NO<sub>2</sub>]<sup>+</sup> requires *m/z* 167.0946, found *m/z* 167.0938.

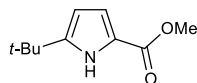

**Methyl 5-(tert-butyl)-1H-pyrrole-2-carboxylate (6g)** (Table 2, entry 8). Experiment 1: Prepared according to the General Procedure using 157 mg (0.75 mmol) of (2*Z*,4*E*)-methyl 2-azido-6,6-dimethylhepta-2,4-dienoate **5g**, 9.0 mg (0.0075 mmol) of Ru(dtbbpy)<sub>3</sub>(PF<sub>6</sub>)<sub>2</sub>, 7.5 mL of chloroform, and an irradiation time of 14 h. Purified by flash column chromatography on silica using a solvent gradient (9:1 to 7:1 hexanes:EtOAc) to afford 115 mg (0.63 mmol, 85% yield) of the pyrrole as a white solid (mp = 125.0–126.8 °C). Experiment 2: 157 mg (0.75 mmol) of dienyl azide, 9.0 mg (0.0075 mmol) of Ru(dtbbpy)<sub>3</sub>(PF<sub>6</sub>)<sub>2</sub>,

and 7.5 mL of chloroform. Isolated 119 mg (0.66 mmol, 88% yield). IR (neat) 3333, 2952, 1689, 1492, 1274, 1171  $\text{cm}^{-1}$ .  $^1\text{H}$  NMR: (500.2 MHz,  $\text{CDCl}_3$ )  $\delta$  8.98 (br s, 1H), 6.82 (dd,  $J = 3.7, 2.5$  Hz, 1H), 6.00 (dd,  $J = 3.7, 2.7$  Hz, 1H), 3.83 (s, 3H), 1.32 (s, 9H);  $^{13}\text{C}$  NMR: (125.8 MHz,  $\text{CDCl}_3$ )  $\delta$  161.9, 147.8, 120.8, 115.7, 105.7, 51.4, 31.8, 30.3; HRMS (EI) calculated for  $[\text{C}_{10}\text{H}_{15}\text{NO}_2]^+$  requires  $m/z$  181.1103, found  $m/z$  181.1100.

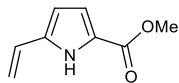

**Methyl 5-vinyl-1H-pyrrole-2-carboxylate (6h)** (Table 2, entry 9). Experiment 1: Prepared according to the General Procedure using 134 mg (0.75 mmol) of (2*Z*,4*E*)-methyl 2-azidohepta-2,4,6-trienoate **5h**, 9.1 mg (0.0076 mmol) of  $\text{Ru}(\text{dtbbpy})_3(\text{PF}_6)_2$ , 7.5 mL of chloroform, and an irradiation time of 2 h. Purified by flash column chromatography on silica using a solvent gradient (8:1 to 7:1 hexanes:EtOAc) to afford 99 mg (0.65 mmol, 87% yield) of the pyrrole as a white solid (mp = 100.3–101.4 °C). Experiment 2: 134 mg (0.75 mmol) of dienyl azide, 9.1 mg (0.0076 mmol) of  $\text{Ru}(\text{dtbbpy})_3(\text{PF}_6)_2$ , and 7.5 mL of chloroform. Isolated 102 mg (0.67 mmol, 90% yield). IR (neat) 3285, 1682, 1483, 1439, 1331, 1257, 1149, 1052  $\text{cm}^{-1}$ .  $^1\text{H}$  NMR: (500.2 MHz,  $\text{CDCl}_3$ )  $\delta$  9.26 (m, 1H), 6.86 (dd,  $J = 3.8, 2.4$  Hz, 1H), 6.55 (dd,  $J = 17.8, 11.2$  Hz, 1H), 6.27 (dd,  $J = 3.7, 2.7$  Hz, 1H), 5.57 (d,  $J = 17.9$  Hz, 1H), 5.22 (d,  $J = 11.4$  Hz, 1H), 3.86 (s, 1H);  $^{13}\text{C}$  NMR: (125.8 MHz,  $\text{CDCl}_3$ )  $\delta$  161.6, 135.3, 126.3, 122.5, 116.3, 113.1, 109.7, 51.5; HRMS (EI) calculated for  $[\text{C}_8\text{H}_9\text{NO}_2]^+$  requires  $m/z$  151.0633, found  $m/z$  151.0628.

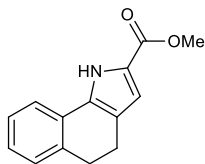

**Methyl 4,5-dihydro-1H-benzo[g]indole-2-carboxylate (6i)** (Table 2, entry 10). Experiment 1: Prepared according to the General Procedure using 191 mg (0.75 mmol) of (*Z*)-methyl 2-azido-3-(3,4-dihydronaphthalen-2-yl)acrylate **5i**, 9.1 mg (0.0076 mmol) of  $\text{Ru}(\text{dtbbpy})_3(\text{PF}_6)_2$ , 7.5 mL of chloroform, and an irradiation time of 4 h. Purified by flash column chromatography on silica using a solvent gradient (6:1 to 4:1 hexanes:EtOAc) to afford 164 mg (0.72 mmol, 96% yield) of the pyrrole as a white solid (mp = 145.3–147.0 °C). Experiment 2: 191 mg (0.75 mmol) of dienyl azide, 9.0 mg (0.0075 mmol) of  $\text{Ru}(\text{dtbbpy})_3(\text{PF}_6)_2$ , and 7.5 mL of chloroform. Isolated 165 mg (0.73 mmol, 97% yield). IR (neat) 3303, 2844, 1686, 1448, 1300, 766  $\text{cm}^{-1}$ .  $^1\text{H}$  NMR: (499.8 MHz,  $\text{CDCl}_3$ )  $\delta$  9.75 (br s, 1H), 7.47 (m, 1H), 7.19 (m, 3H), 6.78 (d,  $J = 2.2$  Hz, 1H), 3.90 (s, 3H), 2.94 (t,  $J = 7.1$  Hz, 1H), 2.75 (t,  $J = 7.1$  Hz, 1H);  $^{13}\text{C}$  NMR: (125.7 MHz,  $\text{CDCl}_3$ )  $\delta$  162.2, 136.4, 133.0, 128.6, 128.1, 127.0, 126.7, 121.9, 121.8, 120.4, 114.4, 51.7, 29.8, 21.5; HRMS (EI) calculated for  $[\text{C}_{14}\text{H}_{13}\text{NO}_2]^+$  requires  $m/z$  227.0946, found  $m/z$  227.0950.

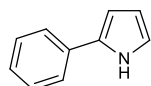

**2-Phenyl-1H-pyrrole (6j)** (Table 2, entry 11). Experiment 1: Prepared according to the General Procedure using 129 mg (0.75 mmol) of ((1*E*,3*E*)-4-azidobuta-1,3-dien-1-yl)benzene **5j**, 9.1 mg (0.0076 mmol) of  $\text{Ru}(\text{dtbbpy})_3(\text{PF}_6)_2$ , 7.5 mL of chloroform, and an irradiation time of 3 h. Purified by flash column chromatography on silica using a solvent gradient (7:1 to 6:1 hexanes:EtOAc) to afford 100 mg (0.70 mmol, 93% yield) of the pyrrole as a white solid. Experiment 2: 128 mg (0.75 mmol) of dienyl azide, 9.0 mg (0.0075 mmol) of  $\text{Ru}(\text{dtbbpy})_3(\text{PF}_6)_2$ , and 7.5 mL of chloroform. Isolated 97 mg (0.68 mmol, 90% yield). All spectral data were in complete agreement with a sample of commercially available material.

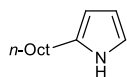

**2-Octyl-1H-pyrrole (6k)** (Table 2, entries 12-13). Experiment 1: Prepared according to the General Procedure using 156 mg (0.75 mmol) of (1*E*,3*E*)-1-azidododeca-1,3-diene **5k**, 9.0 mg (0.0075 mmol) of  $\text{Ru}(\text{dtbbpy})_3(\text{PF}_6)_2$ , 7.5 mL of chloroform, and an irradiation time of 36 h. Purified by flash column chromatography on silica using a solvent gradient (10:1 to 8:1 hexanes:EtOAc) to afford 61 mg (0.34 mmol, 45% yield) of the pyrrole as a clear oil that turned yellow upon standing. Experiment 2: 156 mg (0.75 mmol) of dienyl azide, 9.2 mg (0.0077 mmol) of  $\text{Ru}(\text{dtbbpy})_3(\text{PF}_6)_2$ , and 7.5 mL of chloroform. Isolated 66 mg (0.37 mmol, 49% yield). Experiment 3: Prepared according to the General Procedure using 156 mg (0.75 mmol) of (1*E*,3*E*)-1-azidododeca-1,3-diene **5k**, 8.4 mg (0.0075 mmol) of  $[\text{Ir}(\text{dF}(\text{CF}_3)\text{ppy})_2(\text{dtbbpy})](\text{PF}_6)$ , 7.5 mL of chloroform, and an irradiation time of 12 h. Purified by flash column chromatography on silica using a solvent gradient (10:1 to 8:1 hexanes:EtOAc) to afford 91 mg (0.51 mmol, 68% yield) of the pyrrole. Experiment 4: 156 mg (0.75 mmol) of dienyl azide, 8.3 mg (0.0074 mmol) of  $[\text{Ir}(\text{dF}(\text{CF}_3)\text{ppy})_2(\text{dtbbpy})](\text{PF}_6)$ , and 7.5 mL of chloroform. Isolated 95 mg (0.53 mmol, 71% yield). IR (neat) 3383, 2952, 2931, 2856, 1567, 1467, 1093  $\text{cm}^{-1}$ .  $^1\text{H}$  NMR: (500.2 MHz,  $\text{CDCl}_3$ )



$\delta$  7.89 (br s, 1H), 6.66 (dd,  $J = 2.7, 1.6$  Hz, 1H), 6.13 (app dt,  $J = 3.0, 2.6$  Hz, 1H), 5.91 (m, 1H), 2.59 (m, 2H), 1.62 (tt,  $J = 7.9, 6.7$  Hz, 2H), 1.30 (m, 10H), 0.88 (t,  $J = 6.7$  Hz, 3H);  $^{13}\text{C}$  NMR: (125.7 MHz,  $\text{CDCl}_3$ )  $\delta$  133.0, 116.0, 108.3, 104.9, 32.0, 29.8, 29.5, 29.5, 29.3, 27.8, 22.8, 14.2; HRMS (EI) calculated for  $[\text{C}_{12}\text{H}_{21}\text{N}]^+$  requires  $m/z$  179.1674, found  $m/z$  179.1669.

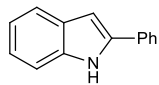

**2-Phenyl-1H-indole (6l)** (Table 2, entry 14). Experiment 1: Prepared according to the General Procedure using 166 mg (0.75 mmol) of (*E*)-1-azido-2-styrylbenzene **5l**, 9.0 mg (0.0075 mmol) of  $\text{Ru}(\text{dtbbpy})_3(\text{PF}_6)_2$ , 7.5 mL of chloroform, and an irradiation time of 20 h. Purified by flash column chromatography on silica (20:1 hexanes:EtOAc) to afford 107 mg (0.55 mmol, 74% yield) of the pyrrole as a white solid. Experiment 2: 166 mg (0.75 mmol) of dienyli azide, 9.0 mg (0.0075 mmol) of  $\text{Ru}(\text{dtbbpy})_3(\text{PF}_6)_2$ , and 7.5 mL of chloroform. Isolated 110 mg (0.57 mmol, 76% yield). All spectral data were in complete agreement with previously reported values.<sup>2</sup>

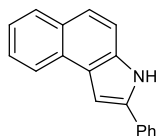

**2-Phenyl-3H-benzo[e]indole (6m)** (Table 2, entry 15). Experiment 1: Prepared according to the General Procedure using 204 mg (0.75 mmol) of (*E*)-2-azido-1-styrylnaphthalene **5m**, 9.1 mg (0.0076 mmol) of  $\text{Ru}(\text{dtbbpy})_3(\text{PF}_6)_2$ , 7.5 mL of chloroform, and an irradiation time of 6 h. Purified by flash column chromatography on silica (9:1 hexanes:EtOAc) to afford 169 mg (0.69 mmol, 93% yield) of the pyrrole as a white solid (mp = 136.6–137.1 °C). Experiment 2: 204 mg (0.75 mmol) of dienyli azide, 9.0 mg (0.0075 mmol) of  $\text{Ru}(\text{dtbbpy})_3(\text{PF}_6)_2$ , and 7.5 mL of chloroform. Isolated 167 mg (0.69 mmol, 92% yield). IR (neat) 3427, 3048, 1621, 1603, 1484, 1455, 1333, 1181, 1026  $\text{cm}^{-1}$ .  $^1\text{H}$  NMR: (500.0 MHz,  $\text{CDCl}_3$ )  $\delta$  8.65 (br s, 1H), 8.27 (d,  $J = 8.1$  Hz, 1H), 7.90 (d,  $J = 8.1$  Hz, 1H), 7.72 (m, 2H), 7.61 (d,  $J = 8.8$  Hz, 1H), 7.56 (m, 2H), 7.47 (m, 2H), 7.43 (td,  $J = 6.9, 1.0$  Hz, 1H), 7.38 (d,  $J = 1.9$  Hz, 1H), 7.32 (tt,  $J = 7.2, 1.2$  Hz, 1H);  $^{13}\text{C}$  NMR: (125.7 MHz,  $\text{CDCl}_3$ )  $\delta$  136.1, 133.2, 132.5, 129.4, 129.1, 128.6, 128.1, 127.4, 125.9, 124.9, 124.3, 123.6, 123.4, 123.0, 112.5, 99.3; HRMS (EI) calculated for  $[\text{C}_{18}\text{H}_{14}\text{N}]^+$  requires  $m/z$  244.1121, found  $m/z$  244.1116.

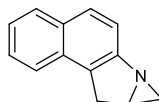

**8a,9-Dihydro-8H-azirino[1,2-a]benzo[e]indole (16)**. Prepared according to the General Procedure using 103 mg (0.49 mmol) of 1-allyl-2-azidonaphthalene (**15**), 5.5 mg (0.0049 mmol) of  $[\text{Ir}(\text{dF}(\text{CF}_3)\text{ppy})_2(\text{dtbbpy})](\text{PF}_6)$ , 4.9 mL of chloroform, and an irradiation time of 5 h. Purified by flash column chromatography on silica (3:2 hexanes:EtOAc) to afford 71 mg (0.39 mmol, 81% yield) of the aziridine as an off-white solid (mp = 78.4–80.8 °C). IR (neat) 3060, 3024, 2988, 2904, 2850, 1625, 1586, 1517, 1460, 1257, 1157  $\text{cm}^{-1}$ .  $^1\text{H}$  NMR: (500.0 MHz,  $\text{CDCl}_3$ )  $\delta$  7.84 (d,  $J = 8.3$  Hz, 1H), 7.68 (d,  $J = 8.7$  Hz, 1H), 7.64 (d,  $J = 8.4$  Hz, 1H), 7.49 (d,  $J = 8.6$  Hz, 1H), 7.47 (m, 1H), 7.39 (m, 1H), 3.69 (d,  $J = 16.8$  Hz, 1H), 3.56 (dd,  $J = 16.8, 7.4$  Hz, 1H), 3.18 (m, 1H), 2.46 (d,  $J = 5.3$  Hz, 1H), 1.41 (d,  $J = 3.9$  Hz, 1H);  $^{13}\text{C}$  NMR: (125.7 MHz,  $\text{CDCl}_3$ )  $\delta$  155.7, 131.5, 131.3, 130.0, 128.6, 128.0, 126.3, 124.4, 123.5, 119.5, 41.2, 39.4, 31.7; HRMS (EI) calculated for  $[\text{C}_{13}\text{H}_{11}\text{N}]^+$  requires  $m/z$  181.0886, found  $m/z$  181.0884.

#### IV. Azirine trapping experiments

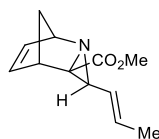

**Methyl 3-((*E*)-prop-1-en-1-yl)-2-azatricyclo[3.2.1.0<sup>2,4</sup>]oct-6-ene-4-carboxylate (7)**. To an oven-dried 25 mL Schlenk tube with a stir bar was added 41.8 mg (0.25 mmol) of (*Z,Z*,4*E*)-methyl 2-azidohexa-2,4-dienoate **1**, 16.5 mg (0.25 mmol) of freshly cracked cyclopentadiene, 3.0 mg (0.0025 mmol) of  $\text{Ru}(\text{dtbbpy})_3(\text{PF}_6)_2$ , and 2.5 mL of  $\text{CH}_3\text{CN}$ . The solution was submitted to three freeze-pump-thaw cycles, purged with  $\text{N}_2$ , and irradiated at rt with a 1 W blue light-emitting diode (LED) strip ( $\lambda = 465\text{--}470$  nm) for 150 min. Thereafter, the reaction was diluted with 1:1 hexanes:EtOAc (1 mL) and eluted through a short silica plug. The volatiles were removed *in vacuo*, and the residue was purified via flash column chromatography on silica (3:2 hexanes:EtOAc) to afford the title compound (36.1 mg, 0.176 mmol, 71% yield) as a clear oil. IR (neat) 3060, 3024, 2988, 2904, 2850, 1625, 1586, 1517, 1460, 1257, 1157  $\text{cm}^{-1}$ .  $^1\text{H}$  NMR: (500.0 MHz,  $\text{CDCl}_3$ )  $\delta$  6.19 (dd,  $J = 5.4, 2.4$  Hz, 1H), 5.73 (m, 1H), 5.72 (dq,  $J = 16.0, 6.6$  Hz, 1H), 5.47 (ddq,  $J = 16.0, 8.0, 1.6$

Hz, 1H), 4.20 (s, 1H), 3.78 (s, 3H), 3.53 (s, 1H), 2.09 (d,  $J = 8.1$  Hz, 1H), 2.02 (dt,  $J = 8.1, 1.8$  Hz, 1H), 1.69 (d,  $J = 8.1$  Hz, 1H), 1.67 (dd,  $J = 6.6, 1.5$  Hz, 1H);  $^{13}\text{C}$  NMR: (125.7 MHz,  $\text{CDCl}_3$ )  $\delta$  172.3, 132.6, 130.4, 128.6, 126.3, 66.8, 58.9, 54.6, 52.4, 49.6, 47.4, 18.0; HRMS (EI) calculated for  $[\text{C}_{12}\text{H}_{16}\text{NO}_2]^+$  requires  $m/z$  206.1176, found  $m/z$  206.1173.

The relative stereochemistry of **7** was determined using NOESY1D spectra – Varian’s standard NOESY1D Chempack sequence was used with a typical setup as follows: mix=0.7· $T_1$ (shortest) ~ 1 s, d1=3· $T_1$ (longest) ~ 12 s, nt=16, ss=-2, selective pulse using a seduce shape. The numbers shown are % enhancements measured as ratios of integrals, normalized by number of protons involved, of the enhanced to selected protons.

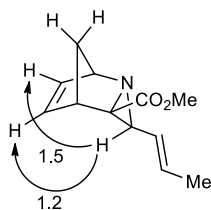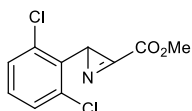

**Methyl 2-(2,6-dichlorophenyl)-2H-azirine-3-carboxylate (9).** Prepared according to the General Procedure using 204 mg (0.75 mmol) of vinyl azide **8**, 8.4 mg (0.0049 mmol) of  $[\text{Ir}(\text{dF}(\text{CF}_3)\text{ppy})_2(\text{dtbbpy})](\text{PF}_6)$ , 7.5 mL of chloroform, and an irradiation time of 8 h. Thereafter, the volatiles were removed *in vacuo* and the resulting residue was recrystallized from benzene/hexanes to afford 165 mg (0.68 mmol, 90% yield) of the azirine as an off-white solid. All spectral data were in complete agreement with previously reported values.<sup>20</sup>

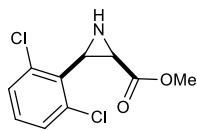

**Methyl 3-(2,6-dichlorophenyl)aziridine-2-carboxylate (10).** To a flame-dried 24 mL vial was added methyl 2-(2,6-dichlorophenyl)-2H-azirine-3-carboxylate **9** (120 mg, 0.492 mmol). The system was evacuated and purged with  $\text{N}_2$  three times before adding  $\text{CH}_2\text{Cl}_2$  (4.9 mL). The homogenous solution was cooled to  $-78$  °C and subsequently a solution of  $\text{Bu}_4\text{NBH}_4$  (127 mg, 0.492 mmol) in  $\text{CH}_2\text{Cl}_2$  (4.9 mL) was added dropwise over 5 min. The reaction was stirred for an additional 30 min, after which  $^1\text{H}$  NMR showed no remaining azirine. The reaction was warmed to 0 °C and  $\text{H}_2\text{O}$  (5 mL) was added to quench the reaction. The organic layer was separated and further extracted with  $\text{H}_2\text{O}$  (2 x 5 mL), washed with brine (1 x 5 mL), dried over  $\text{Na}_2\text{SO}_4$ , filtered, and the volatiles were removed *in vacuo* to afford 198 mg of a viscous yellow oil. The residue was dissolved in  $\text{CH}_2\text{Cl}_2$  (2 mL) and eluted through a short plug of silica gel (4:1 hexanes:EtOAc). The volatiles were removed *in vacuo* and the resulting residue was purified via flash column chromatography on silica (5:1 hexanes:EtOAc) to afford the title compound (72 mg, 0.293 mmol, 58% yield) as a clear oil as a single diastereomer. IR (neat) 3282, 1723, 1546, 1132, 798  $\text{cm}^{-1}$ .  $^1\text{H}$  NMR: (500.0 MHz,  $\text{CDCl}_3$ )  $\delta$  7.29 (d,  $J = 8.0$  Hz, 2H), 7.17 (t,  $J = 8.0$  Hz, 1H), 3.65 (s, 3H), 3.27 (br s, 1H), 3.10 (br s, 1H), 2.02 (br s, 1H);  $^{13}\text{C}$  NMR: (125.7 MHz,  $\text{CDCl}_3$ )  $\delta$  171.1, 136.0, 131.5, 129.4, 128.4, 52.6, 39.1, 36.9; HRMS (EI) calculated for  $[\text{C}_{10}\text{H}_9\text{Cl}_2\text{NO}_2]^+$  requires  $m/z$  245.0010, found  $m/z$  245.0008. The relative stereochemistry was determined by performing a  $\text{D}_2\text{O}$  shake – the broad singlets at  $\delta$  3.27 and  $\delta$  3.10 resolved to  $\delta$  3.27 (dd,  $J = 9.6, 5.8$  Hz, 1H), 3.10 (dd,  $J = 7.8, 5.8$  Hz, 1H). The  $^3J = 5.8$  Hz coupling is consistent with a *cis* relationship of the aziridine ring protons.

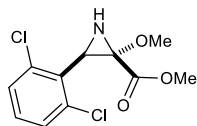

**Methyl 3-(2,6-dichlorophenyl)-2-methoxyaziridine-2-carboxylate (11).** To a flame-dried 12 mL vial was added a solution of NaOMe (freshly prepared from 5.7 mg Na (0.25 mmol) in 1.23 mL MeOH). The solution was cooled to 0 °C and then THF (1.23 mL) was added. The solution was stirred for 5 min before adding methyl 2-(2,6-dichlorophenyl)-2H-azirine-3-carboxylate **9** (30 mg, 0.123 mmol) in a single portion. The reaction immediately turned light yellow and was stirred for 10 min, at which

time TLC analysis indicated complete consumption of the azirine. The reaction was quenched with H<sub>2</sub>O (5 mL) and extracted into EtOAc (2 x 25 mL). The organic layers were combined and washed with brine (1 x 25 mL), dried over Na<sub>2</sub>SO<sub>4</sub>, filtered, and concentrated *in vacuo* to give a clear residue that was purified via flash column chromatography using a solvent gradient (4:1 to 2:1 hexanes:EtOAc) to afford the title product (31 mg, 0.11 mmol, 91% yield) as a clear oil as a single diastereomer. IR (neat) 3277, 1740, 1533, 1121, 777 cm<sup>-1</sup>. <sup>1</sup>H NMR: (500.0 MHz, CDCl<sub>3</sub>) δ 7.29 (d, *J* = 8.0 Hz, 2H), 7.17 (t, *J* = 8.0 Hz, 1H), 3.71 (s, 3H), 3.57 (s, 3H), 3.47 (d, *J* = 9.8 Hz, 1H), 2.61 (d, *J* = 9.7 Hz, 1H); <sup>13</sup>C NMR: (125.7 MHz, CDCl<sub>3</sub>) δ 169.6, 135.6, 130.8, 129.5, 128.5, 73.9, 54.8, 53.3, 46.8; HRMS (EI) calculated for [C<sub>11</sub>H<sub>12</sub>Cl<sub>2</sub>NO<sub>3</sub>]<sup>+</sup> requires *m/z* 276.0189, found *m/z* 276.0194.

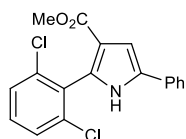

**Methyl 2-(2,6-dichlorophenyl)-5-phenyl-1H-pyrrole-3-carboxylate (14).** To a flame-dried 12 mL vial under N<sub>2</sub> was added methyl 2-(2,6-dichlorophenyl)-2*H*-azirine-3-carboxylate **9** (100 mg, 0.41 mmol) and 1-phenyl-2-(triphenyl-phosphanylidene)-ethanone (156 mg, 0.41 mmol) followed by CH<sub>2</sub>Cl<sub>2</sub> (2.0 mL). The reaction was stirred at rt for 24 h after which the mixture was directly purified via flash column chromatography using a solvent gradient (5:1 to 2:1 hexanes:EtOAc) to afford the title product (82 mg, 0.24 mmol, 58% yield) as a white solid (mp = 161.6–163.1 °C). IR (neat) 3319, 2962, 1689, 1645, 1436, 1137 cm<sup>-1</sup>. <sup>1</sup>H NMR: (500.0 MHz, CDCl<sub>3</sub>) δ 8.54 (br s, 1H), 7.53 (d, *J* = 7.3 Hz, 2H), 7.42 (m, 4H), 7.30 (m, 2H), 7.04 (d, *J* = 3.0 Hz, 1H), 3.71 (s, 3H); <sup>13</sup>C NMR: (125.7 MHz, CDCl<sub>3</sub>) δ 164.4, 136.6, 132.6, 131.4, 131.1, 131.0, 130.6, 129.1, 127.9, 127.3, 124.1, 116.3, 107.4, 51.2; HRMS (EI) calculated for [C<sub>18</sub>H<sub>14</sub>Cl<sub>2</sub>NO<sub>2</sub>]<sup>+</sup> requires *m/z* 346.0397, found *m/z* 346.0409.

## V. References

- Bernhard, S.; Barron, J.A.; Houston, P.L.; Abruña, H.D.; Ruglovsky, J.L.; Gao, X.; Malliaras, G.G. *J. Am. Chem. Soc.* **2002**, *124*, 13624–13628.
- Lowry, M.S.; Goldsmith, J.I.; Slinker, J.D.; Rohl, R.; Pascal, R.A.; Malliaras, G.G.; Bernhard, S. *Chem. Mater.* **2005**, *17*, 5712–5719.
- O'Brien, A.G.; Levesque, F.; Seeberger, P.H. *Chem. Commun.* **2011**, *47*, 2688–2690.
- Shen, M.; Leslie, B.E.; Driver, T.G. *Angew. Chem. Int. Ed.* **2008**, *47*, 5056–5059.
- Alves, M.J.; Fortes, G.; Guimaraes, E.; Lemos, A. *Synlett* **2003**, 1403–1406.
- Alves, M.J.; Gilchrist, T.L. *J. Chem. Soc. Perkin Trans 1* **1998**, 299–303.
- H. Dong, M. Shen, J. Redford, B.J. Stokes, A.L. Pumphrey, T.G. Driver, *Org. Lett.* **2007**, *9*, 5191–5194.
- Piers, E.; Jung, G.L.; Ruediger, E.H. *Can. J. Chem.* **1987**, *65*, 670–682.
- Milton-Fry, M.J.; Cullen, A.J.; Sammakia, T. *Angew. Chem. Int. Ed.* **2007**, *46*(7), 1066–1070.
- Mock, W.L.; Tsou, H-R. *J. Org. Chem.* **1981**, *46*, 2557–2561.
- Dasgupta, R.; Ghatak, R. *Tetrahedron Lett.* **1985**, *26*(12), 1581–1584.
- Thota, N.; Reddy, M.V.; Kumar, A.; Khan, I.A.; Sangwan, P.L.; Kalia, N.P.; Koul, J.L.; Koul, S. *Eur. J. Med. Chem.* **2010**, *45*, 3607–3616.
- Tao, G-Z.; Cui, X.; Li, J.; Liu, A-X.; Liu, L.; Guo, Q-X. *Tetrahedron Lett.* **2007**, *48*, 3525–3529.
- Torrado, A.; López, S.; Alvarez, R.; de Lera, A.R. *Synthesis* **1995**, 285–293.
- Peterson, M.A.; Polt, R. *Synth. Commun.* **1992**, *22*(3), 477–480.
- Negishi, E.; Kotora, M.; Xu, C. *J. Org. Chem.* **1997**, *62*(25), 8957–8960.
- Brown, H.C.; Gupta, S.K. *J. Am. Chem. Soc.* **1972**, *94*, 4370–4371.
- Couzijn, E.P.A.; van den Engel, D.W.F.; Slootweg, J.C.; de Kanter, F.J.J.; Ehlers, A.W.; Schakel, M.; Lammertsma, K. *J. Am. Chem. Soc.* **2002**, *131*, 3741–3751.
- Yoshida, M.; Uchiyama, K.; Narasaka, K. *Heterocycles* **2000**, *52*, 681.
- Henn, L.; Hickey, D.M.B.; Moody, C.J.; Rees, C.W. *J. Chem. Soc. Perkin Trans. 1* **1984**, 2189–2196.

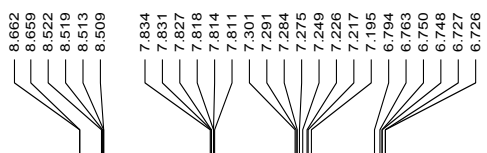

(2*Z*,4*E*)-methyl 2-azido-5-(pyridin-3-yl)penta-2,4-dienoate (**5e**)  
<sup>1</sup>H NMR (500.2 MHz, CDCl<sub>3</sub>)

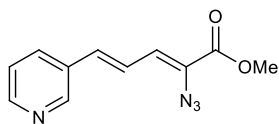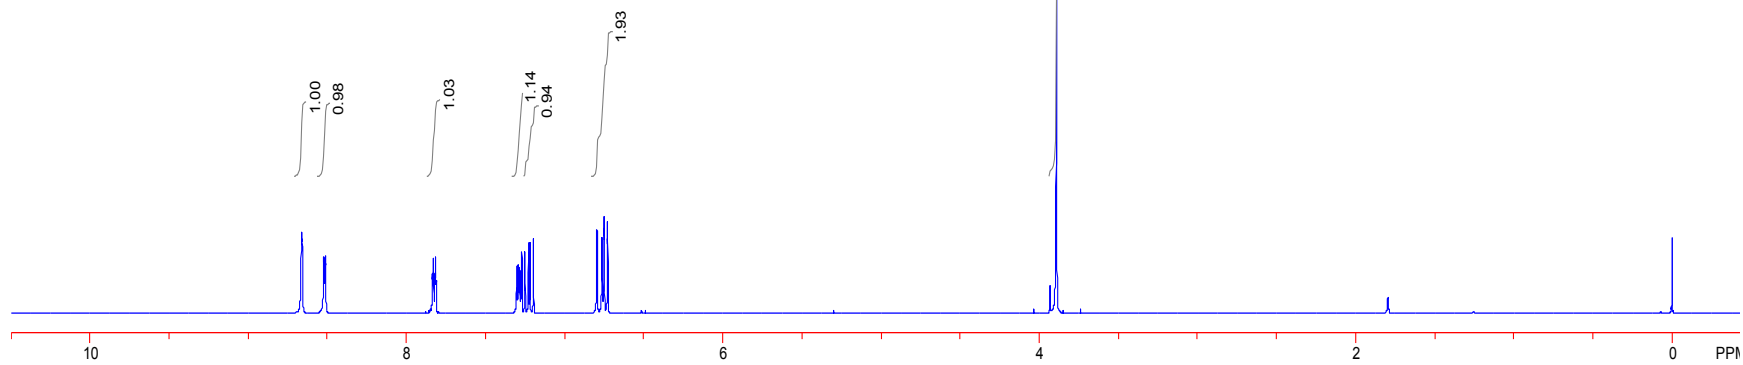

(2*Z*,4*E*)-methyl 2-azido-5-(pyridin-3-yl)penta-2,4-dienoate (**5e**)  
<sup>13</sup>C NMR (125.8 MHz, CDCl<sub>3</sub>)

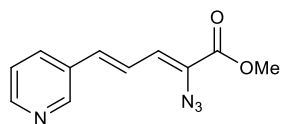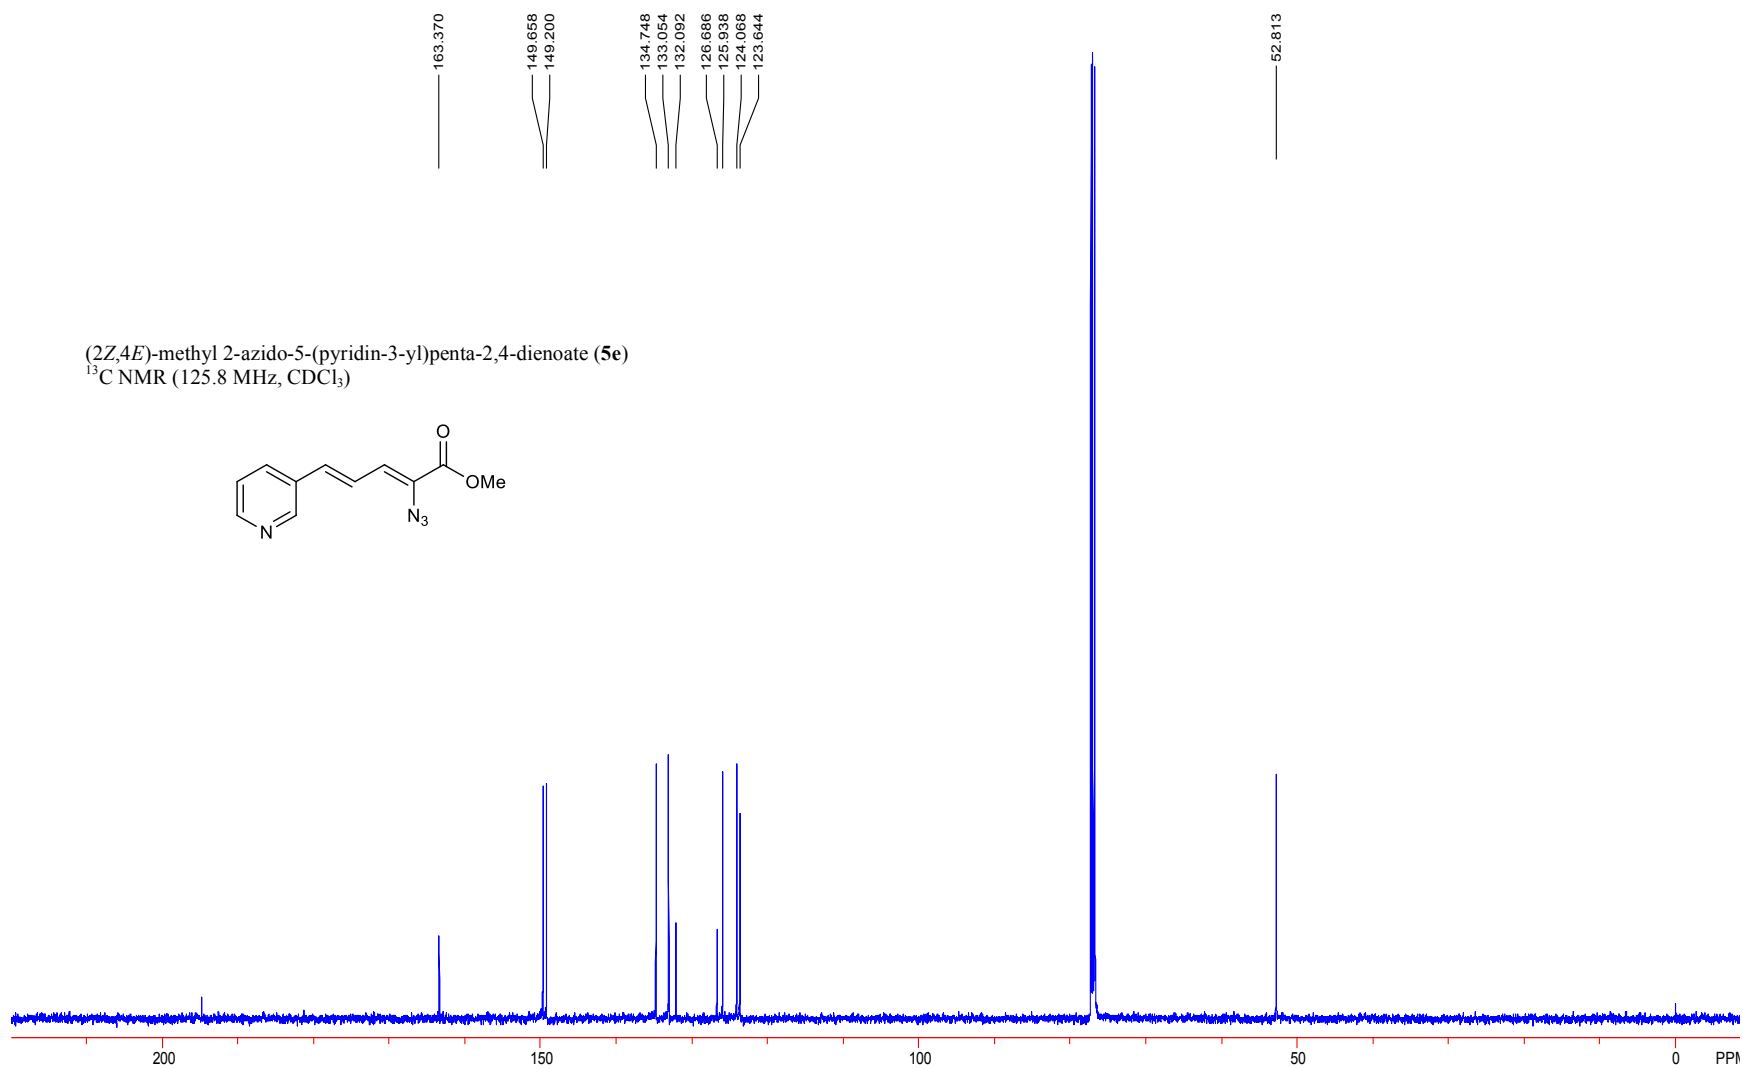

(2*Z*,4*E*)-methyl 2-azido-6-methylhepta-2,4-dienoate (**5f**)  
<sup>1</sup>H NMR (500.2 MHz, CDCl<sub>3</sub>)

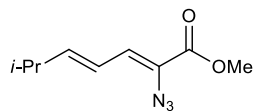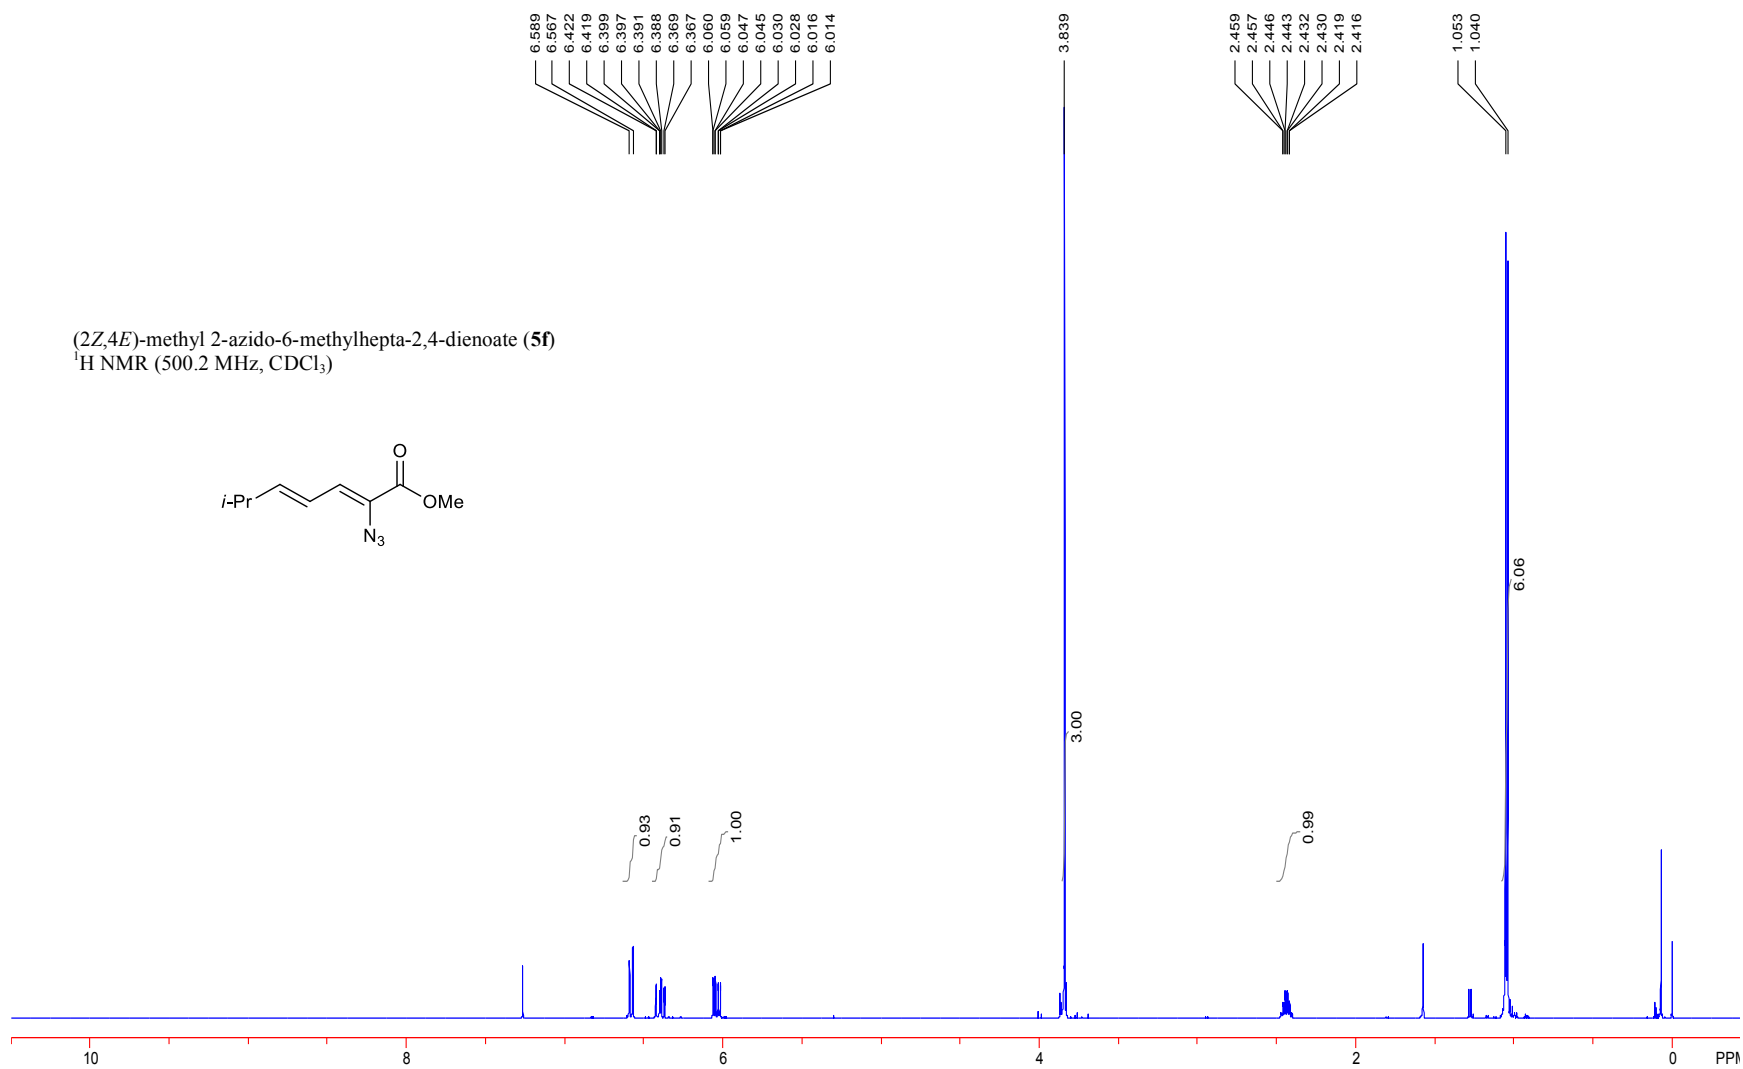

(2*Z*,4*E*)-methyl 2-azido-6-methylhepta-2,4-dienoate (**5f**)  
<sup>13</sup>C NMR (125.8 MHz, CDCl<sub>3</sub>)

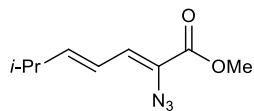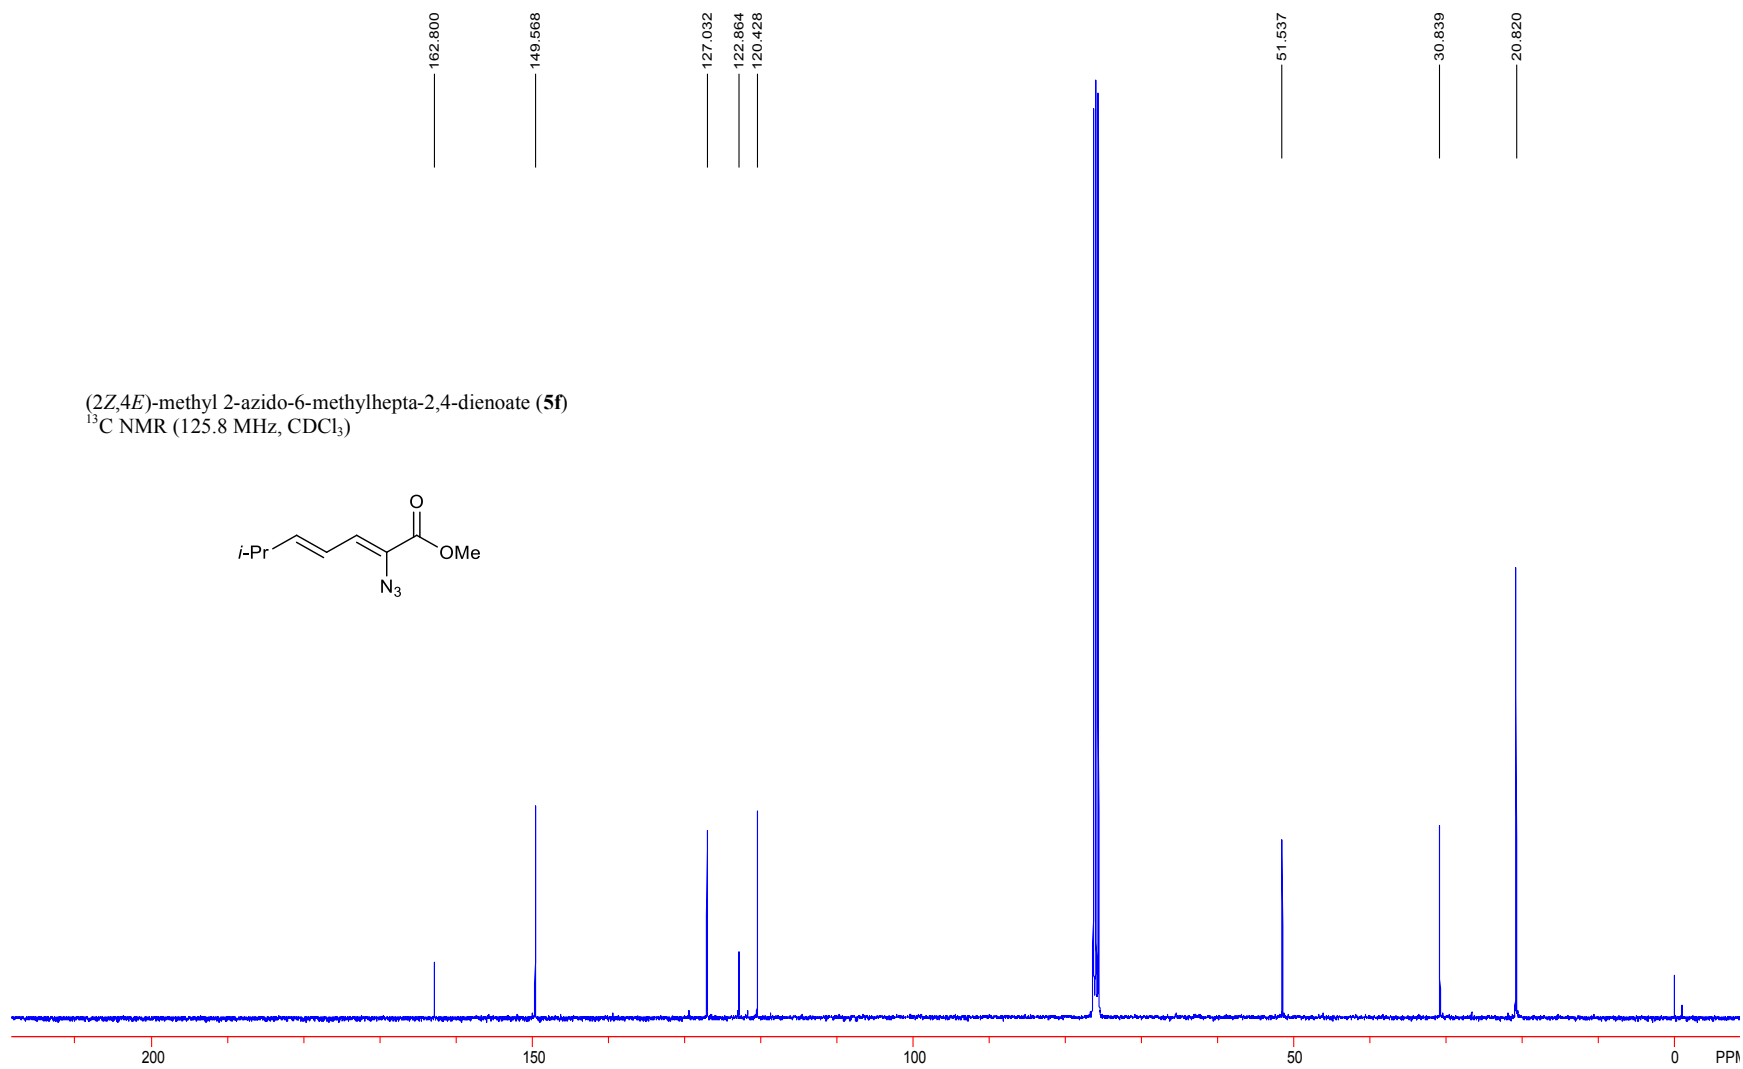

(2*Z*,4*E*)-methyl 2-azido-6,6-dimethylhepta-2,4-dienoate (**5g**)  
<sup>1</sup>H NMR (500.2 MHz, CDCl<sub>3</sub>)

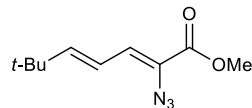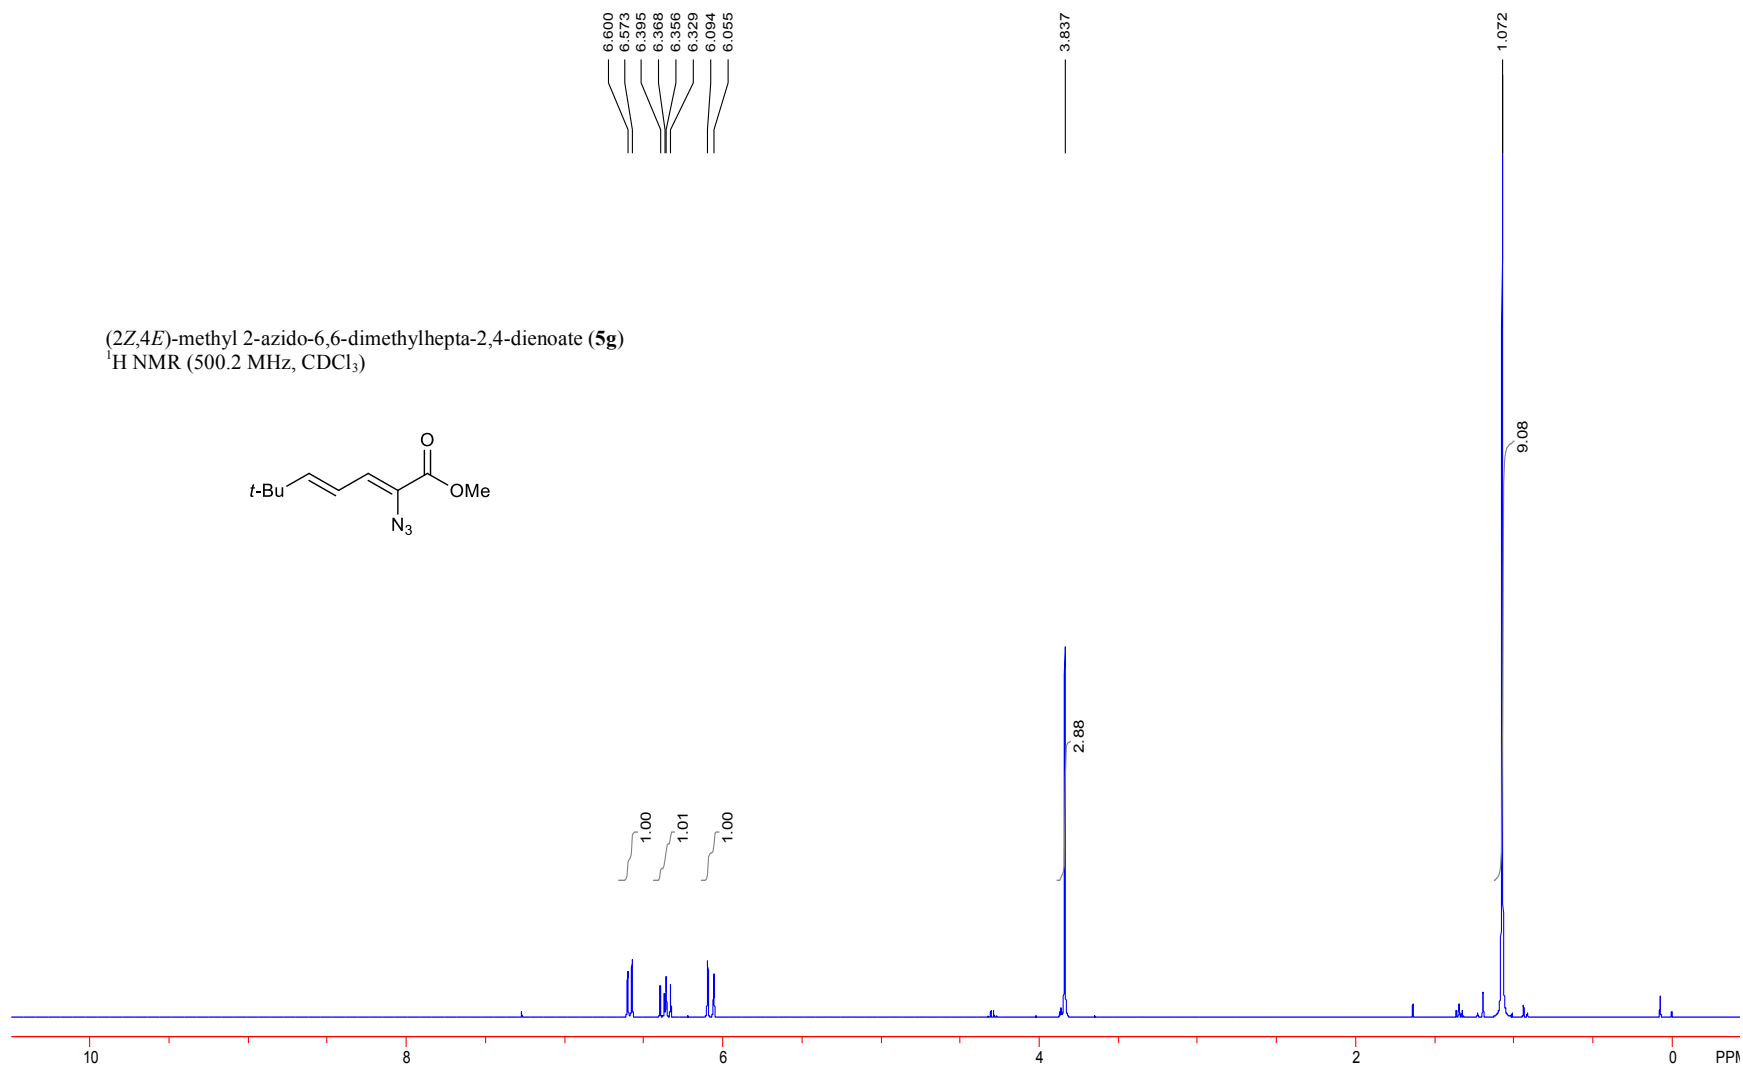



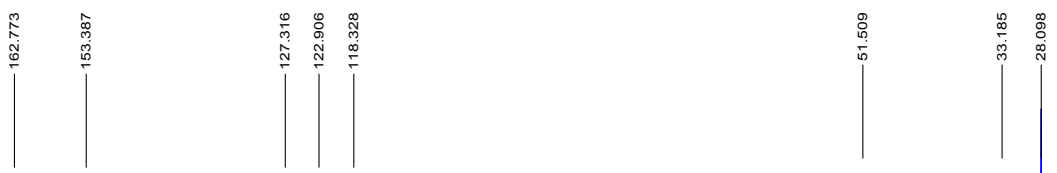

(*Z,Z,E*)-methyl 2-azido-6,6-dimethylhepta-2,4-dienoate (**5g**)  
 $^{13}\text{C}$  NMR (125.8 MHz,  $\text{CDCl}_3$ )

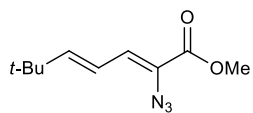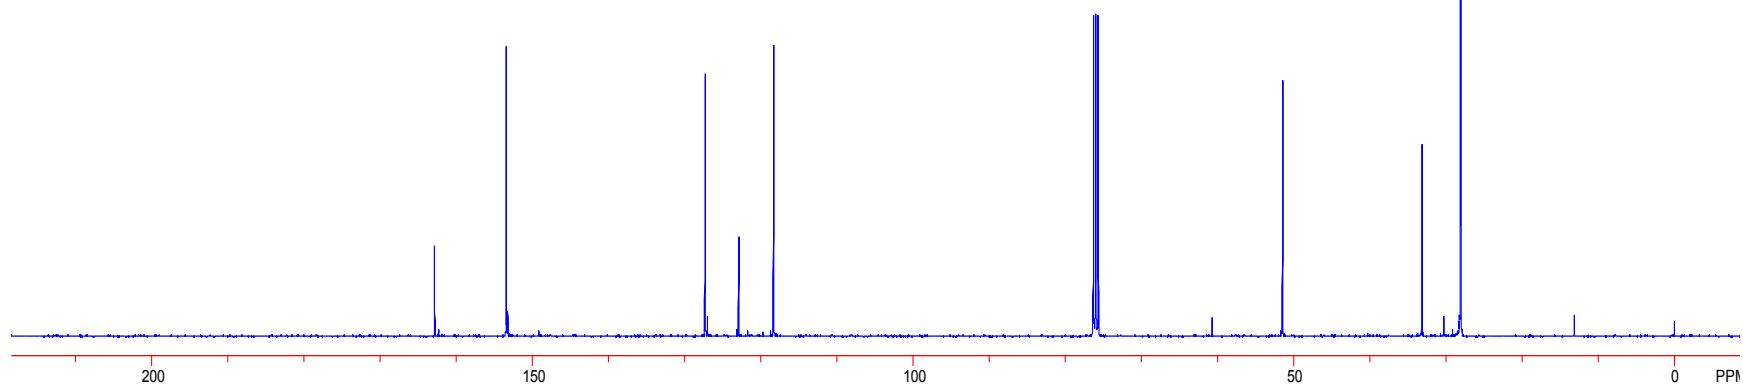

(2*Z*,4*E*)-methyl 2-azidohepta-2,4,6-trienoate (**5h**)  
<sup>1</sup>H NMR (499.8 MHz, C<sub>6</sub>D<sub>6</sub>)

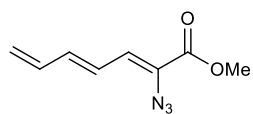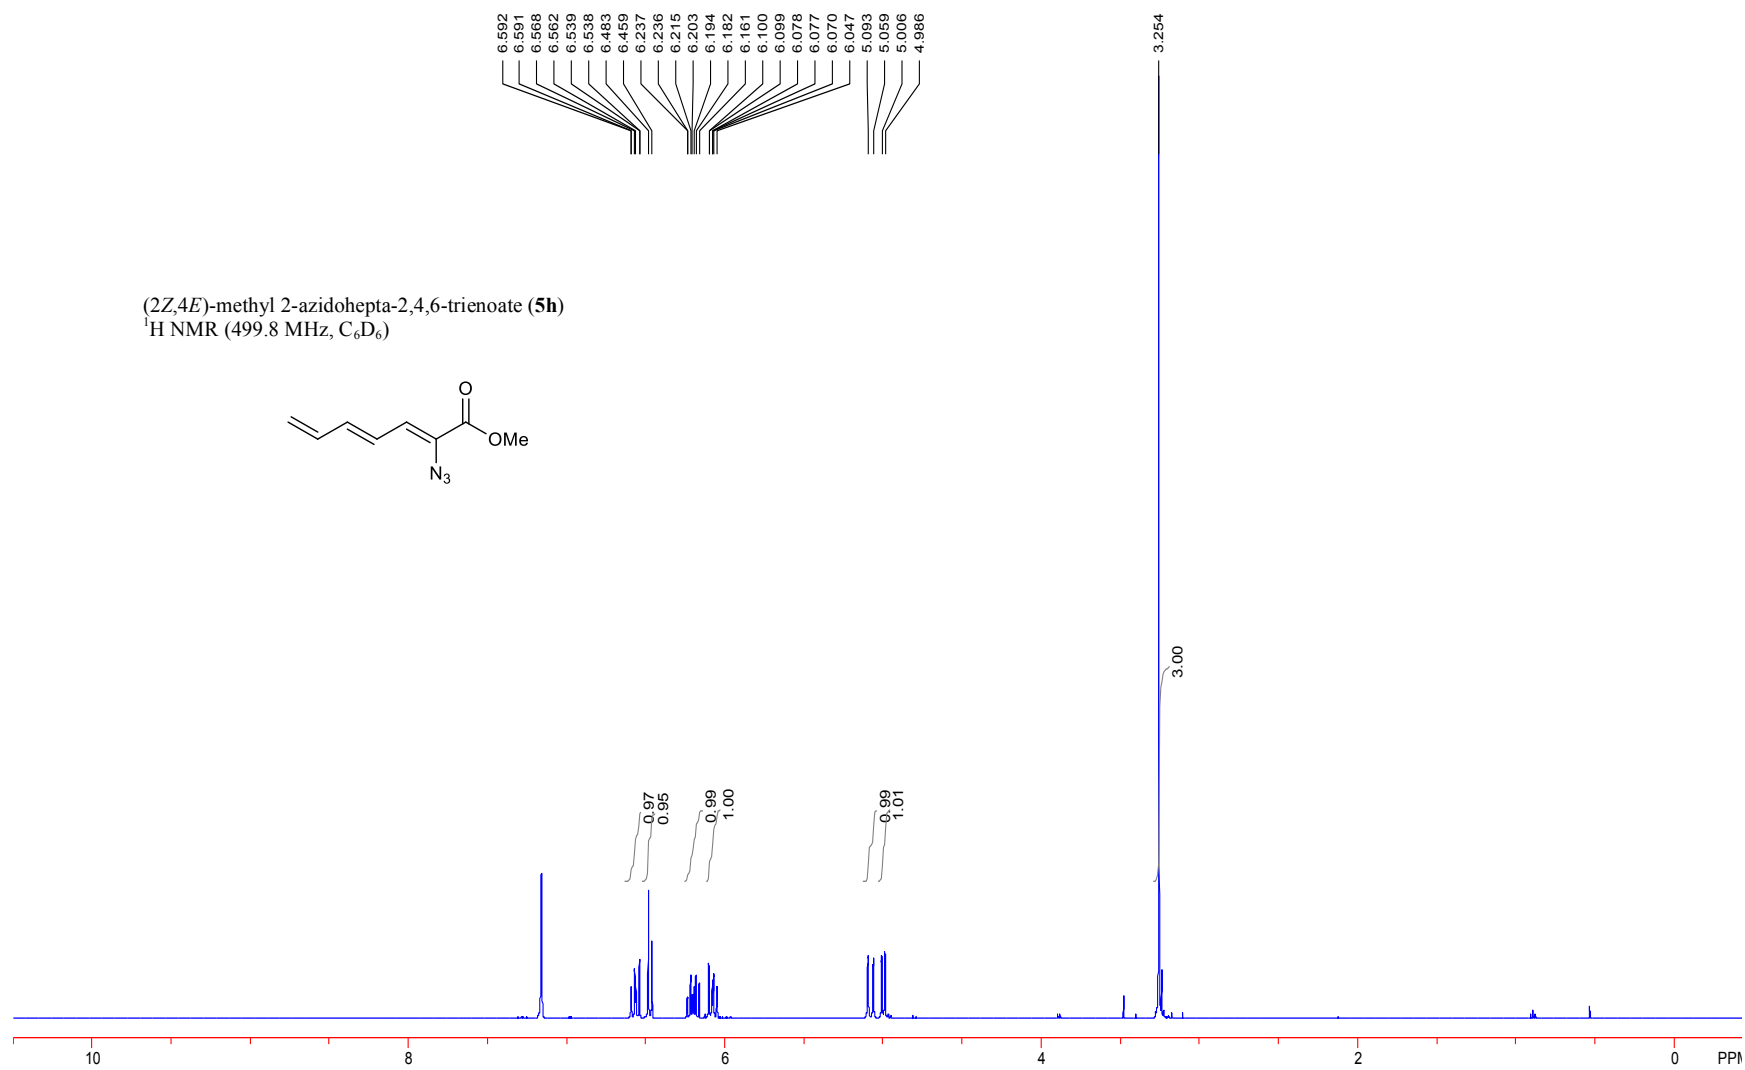

(2*Z*,4*E*)-methyl 2-azidohepta-2,4,6-trienoate (**5h**)  
<sup>13</sup>C NMR (125.7 MHz, C<sub>6</sub>D<sub>6</sub>)

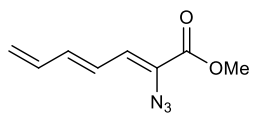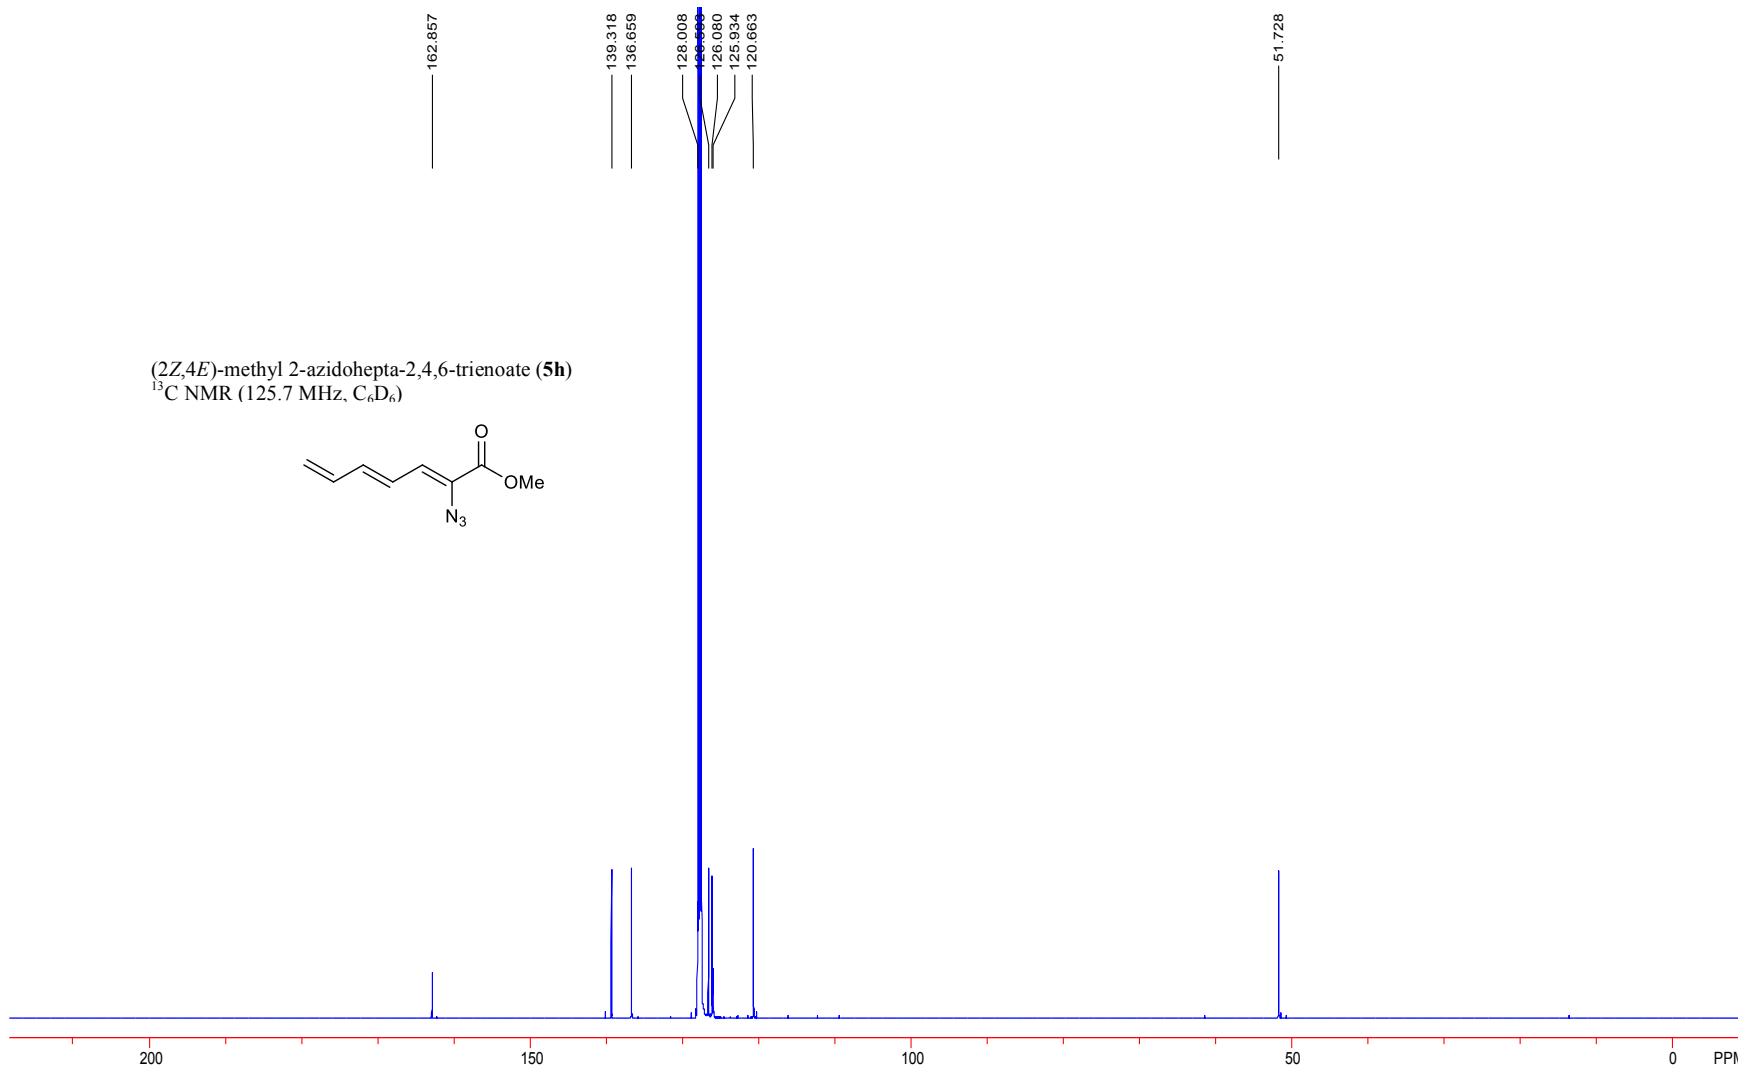

(Z)-methyl 2-azido-3-(3,4-dihydronaphthalen-2-yl)acrylate (**5i**)  
<sup>1</sup>H NMR (499.8 MHz, CDCl<sub>3</sub>)

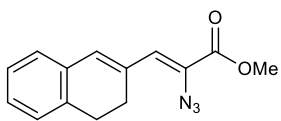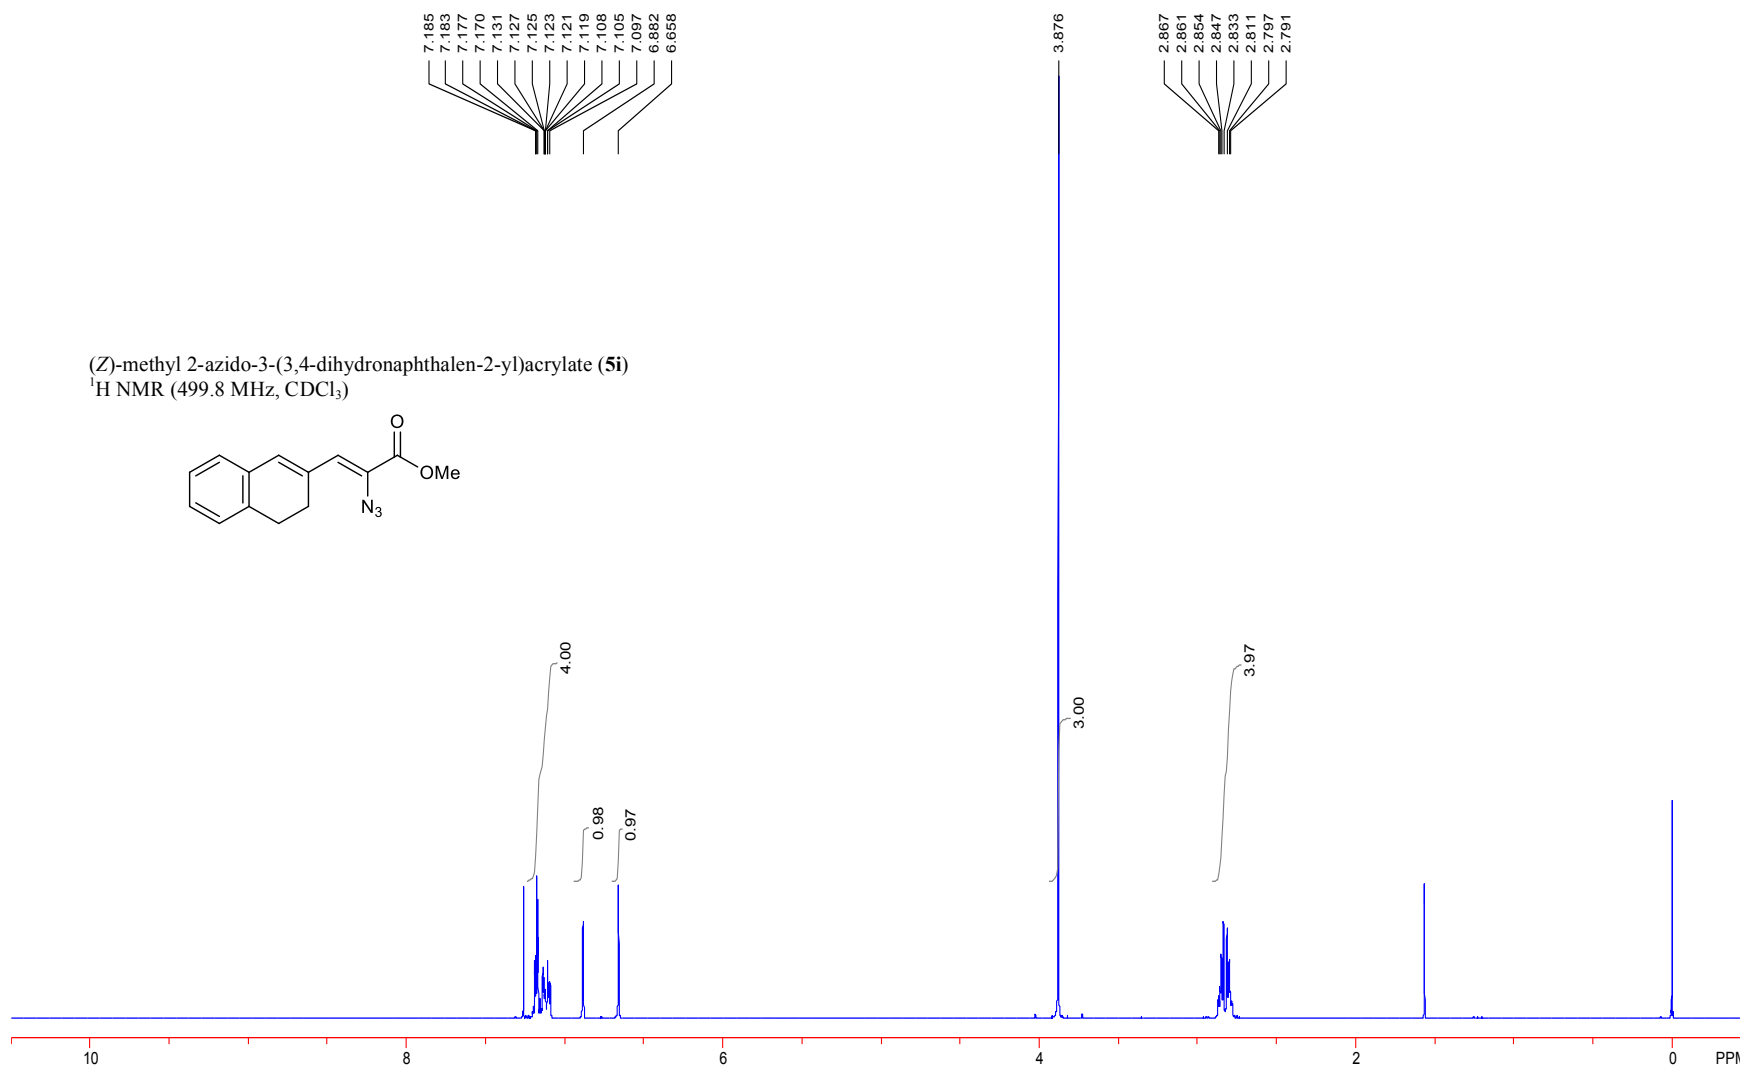

(Z)-methyl 2-azido-3-(3,4-dihydronaphthalen-2-yl)acrylate (**5i**)  
<sup>13</sup>C NMR (125.7 MHz, CDCl<sub>3</sub>)

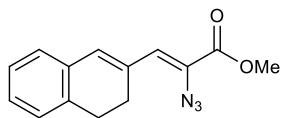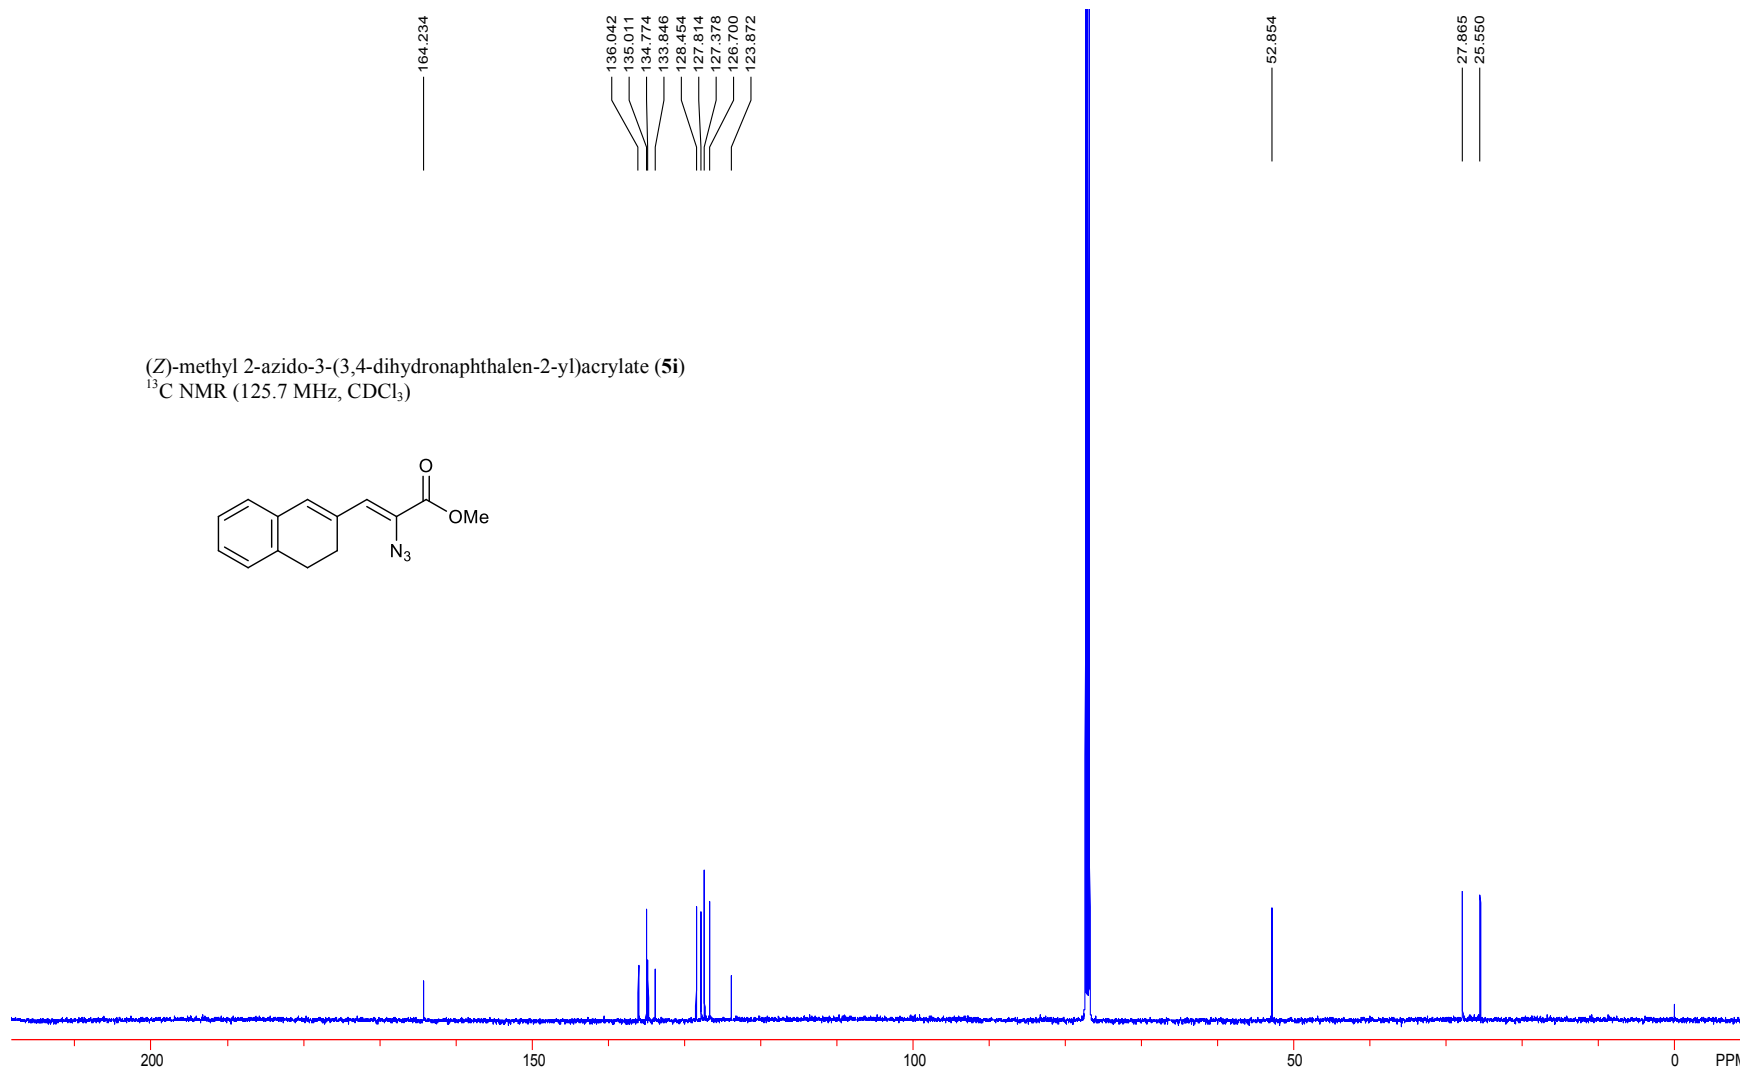

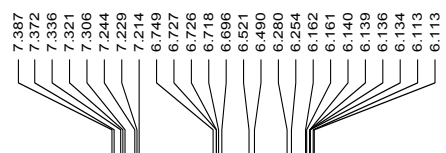

((1*E*,3*E*)-4-azidobuta-1,3-dien-1-yl)benzene (**5j**)  
<sup>1</sup>H NMR (500.2 MHz, CDCl<sub>3</sub>)

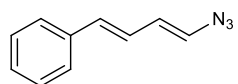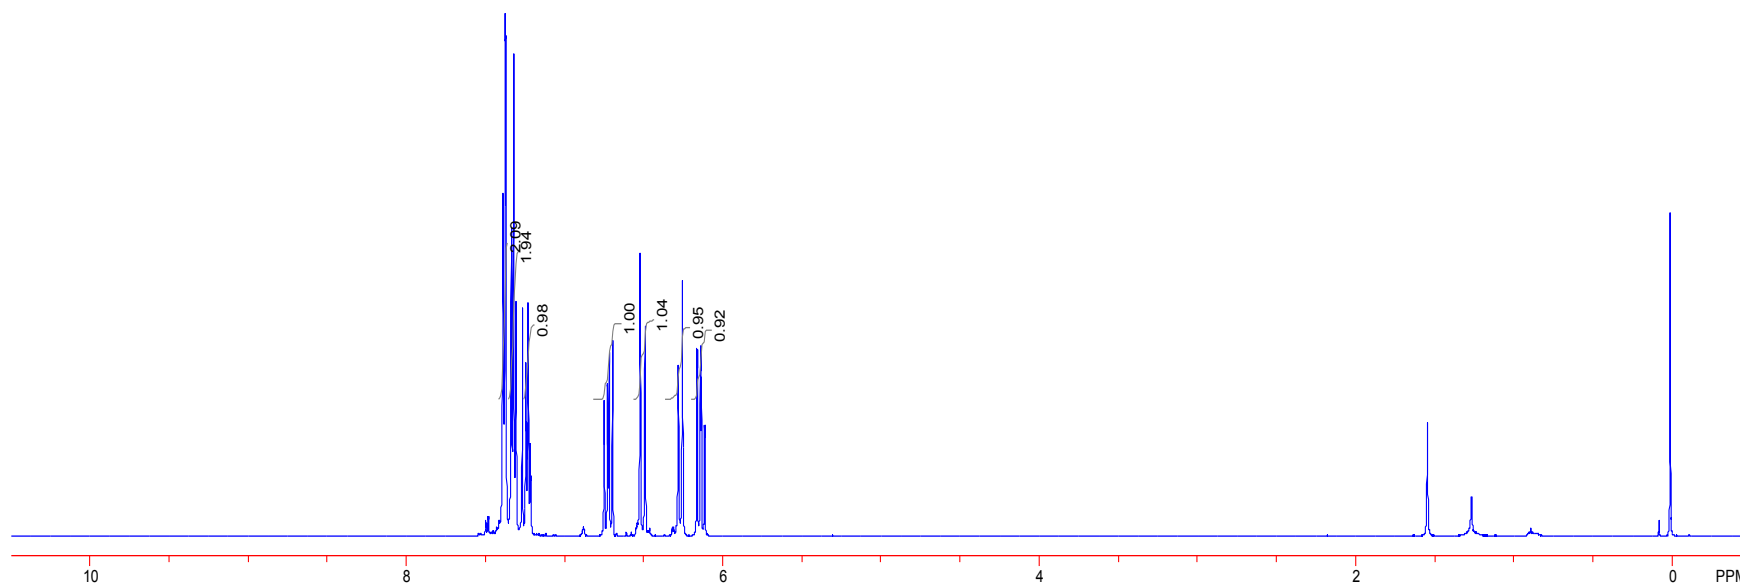

((1*E*,3*E*)-4-azidobuta-1,3-dien-1-yl)benzene (**5j**)  
<sup>13</sup>C NMR (125.8 MHz, CDCl<sub>3</sub>)

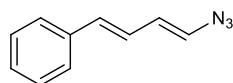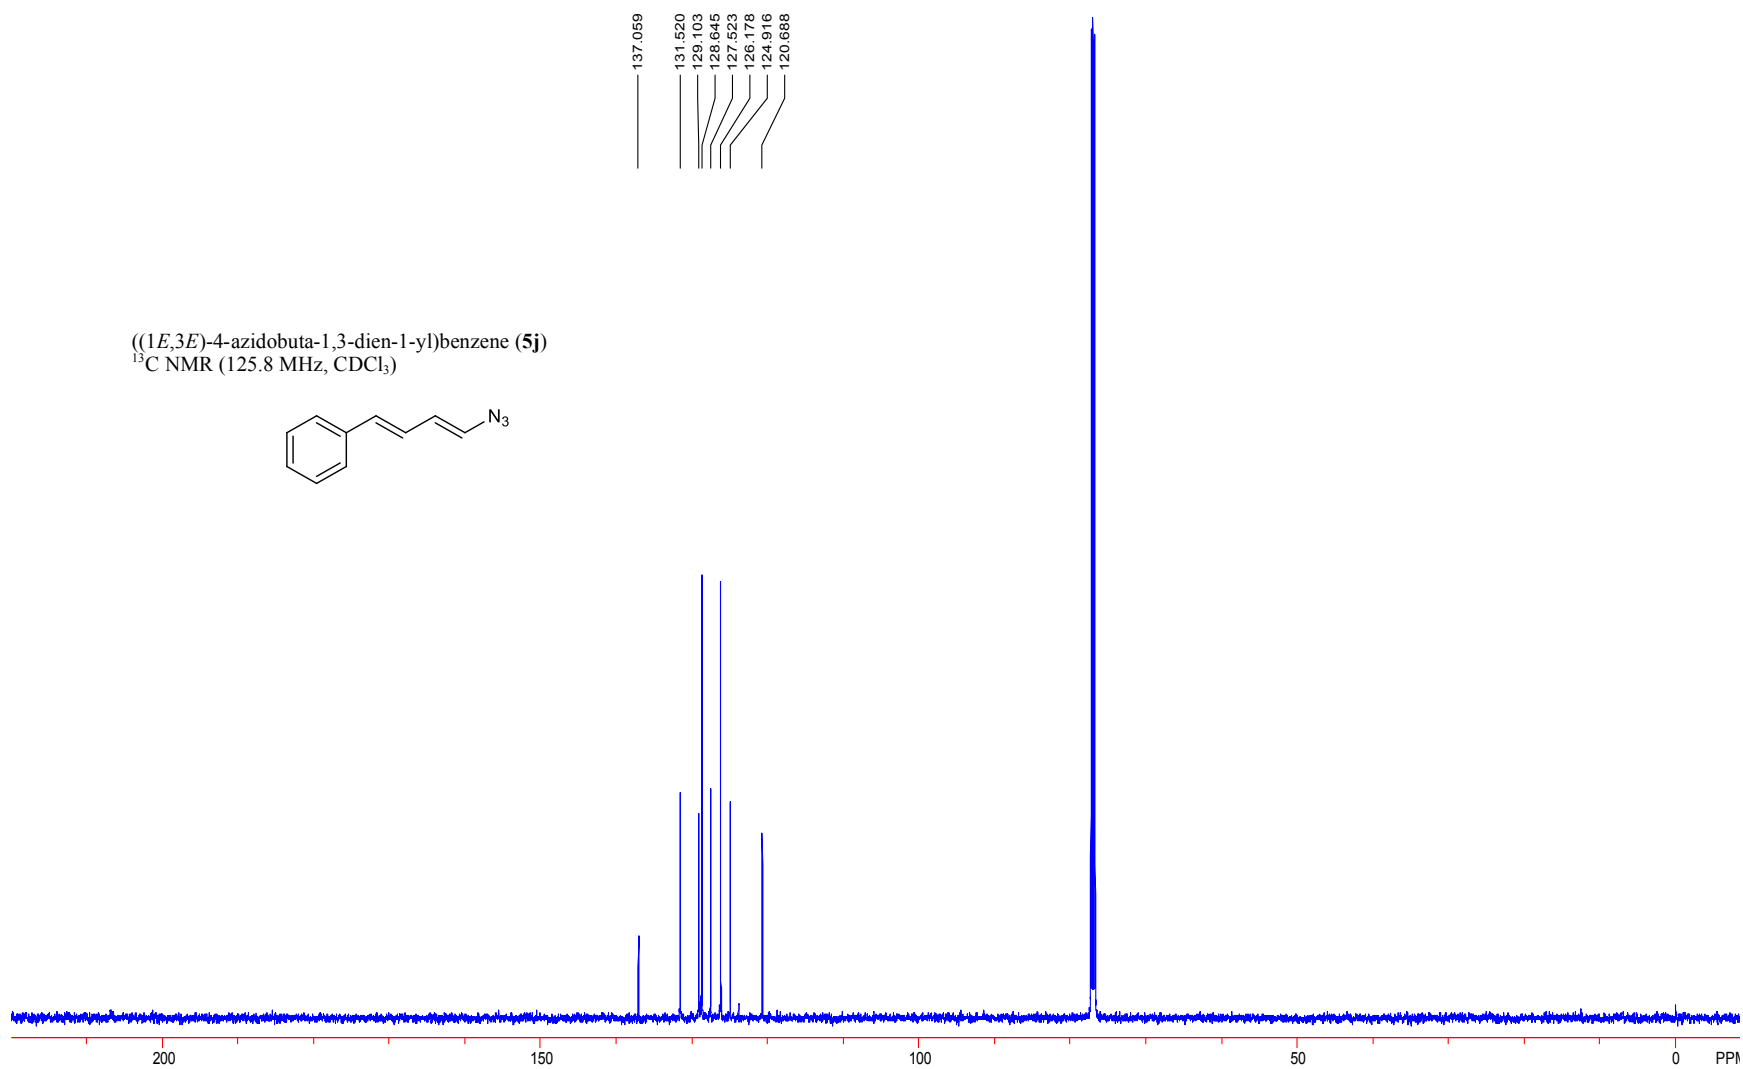

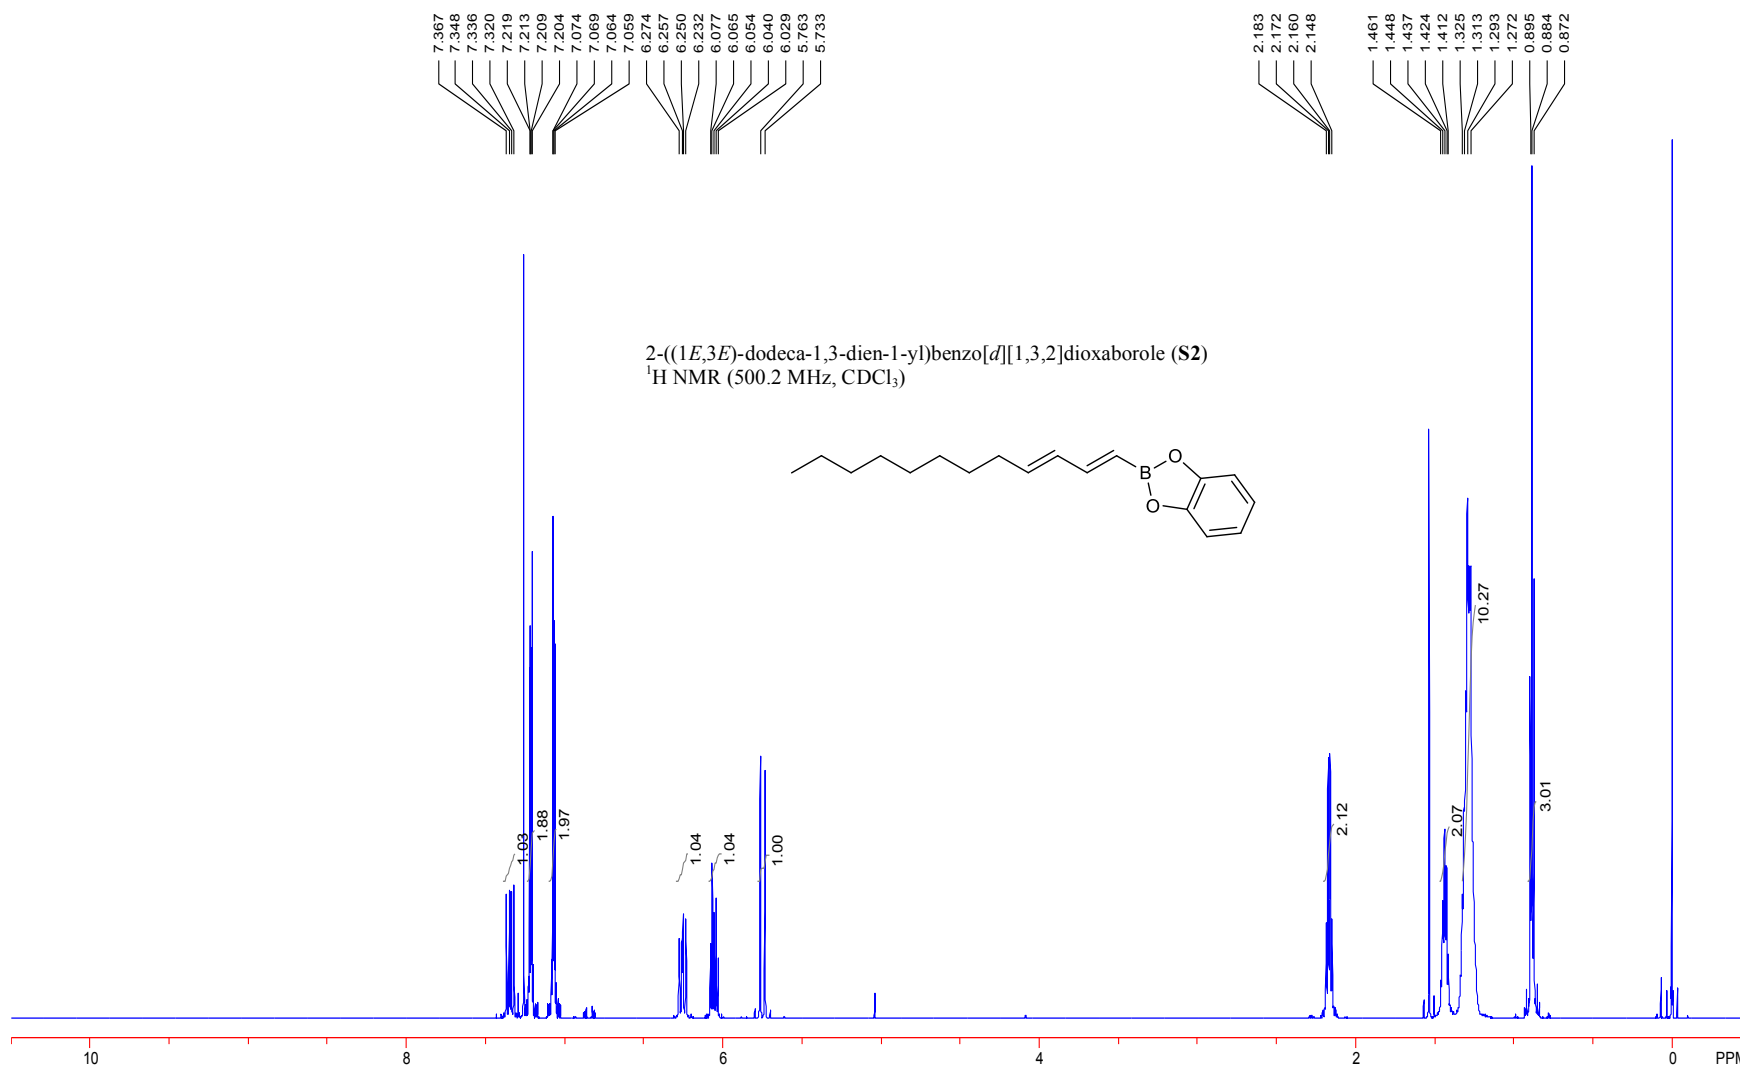



2-((1*E*,3*E*)-dodeca-1,3-dien-1-yl)benzo[*d*][1,3,2]dioxaborole (**S2**)  
<sup>13</sup>C NMR (125.8 MHz, CDCl<sub>3</sub>)

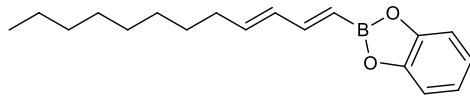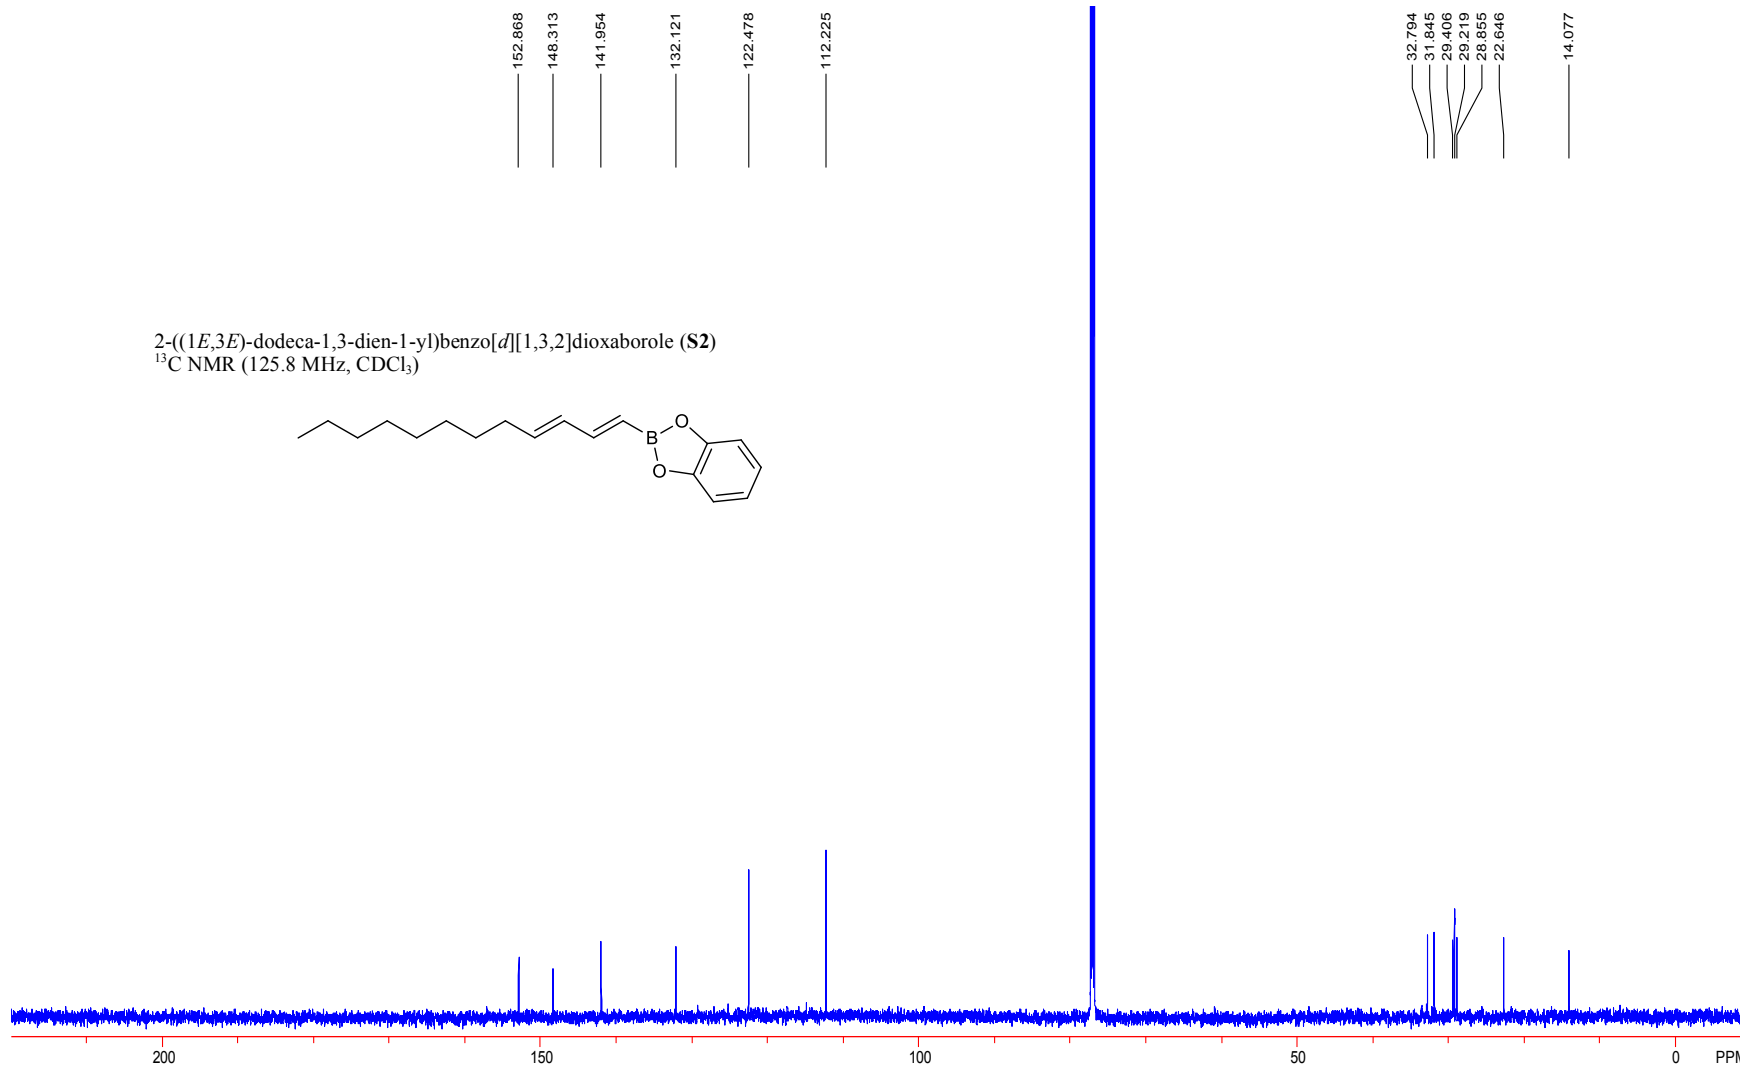

(1*E*,3*E*)-dodeca-1,3-dien-1-ylboronic acid (**S3**)  
<sup>1</sup>H NMR (500.2 MHz, (CD<sub>3</sub>)<sub>2</sub>CO)

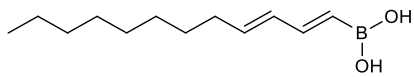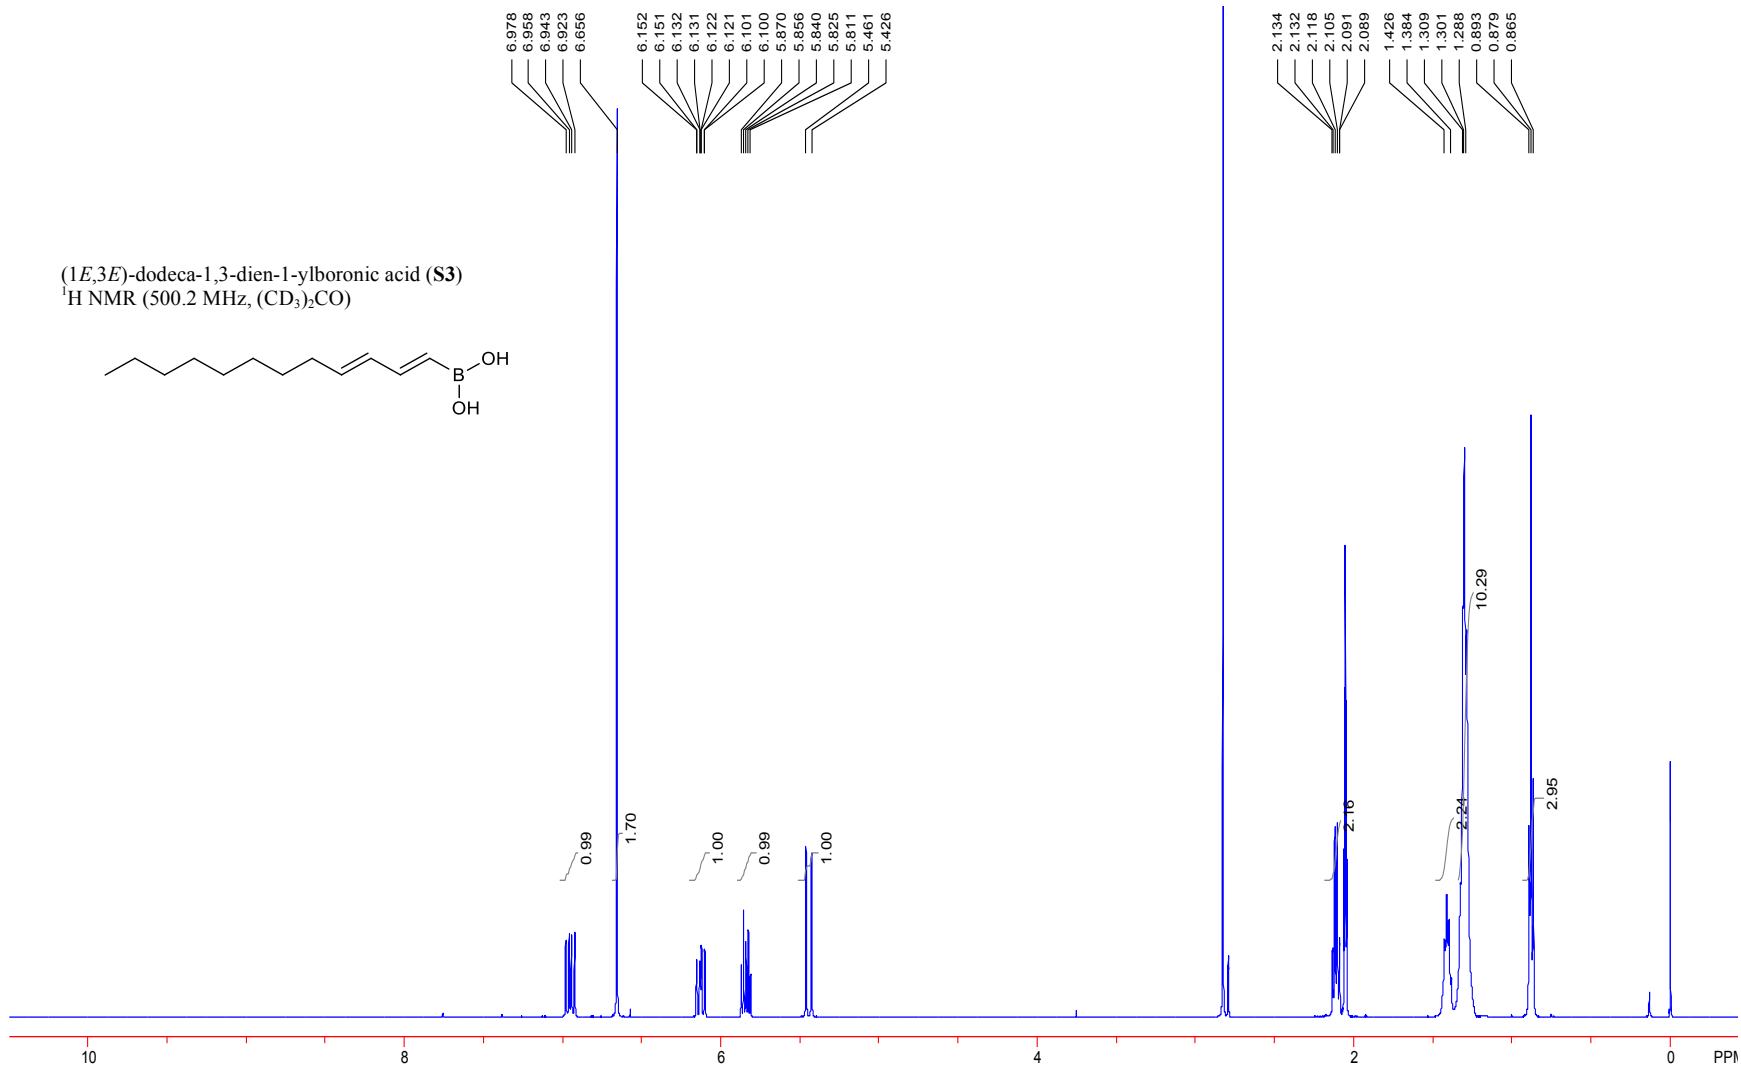

(1*E*,3*E*)-dodeca-1,3-dien-1-ylboronic acid (**S3**)  
<sup>13</sup>C NMR (125.8 MHz, (CD<sub>3</sub>)<sub>2</sub>CO)

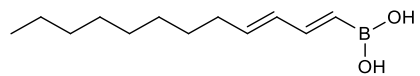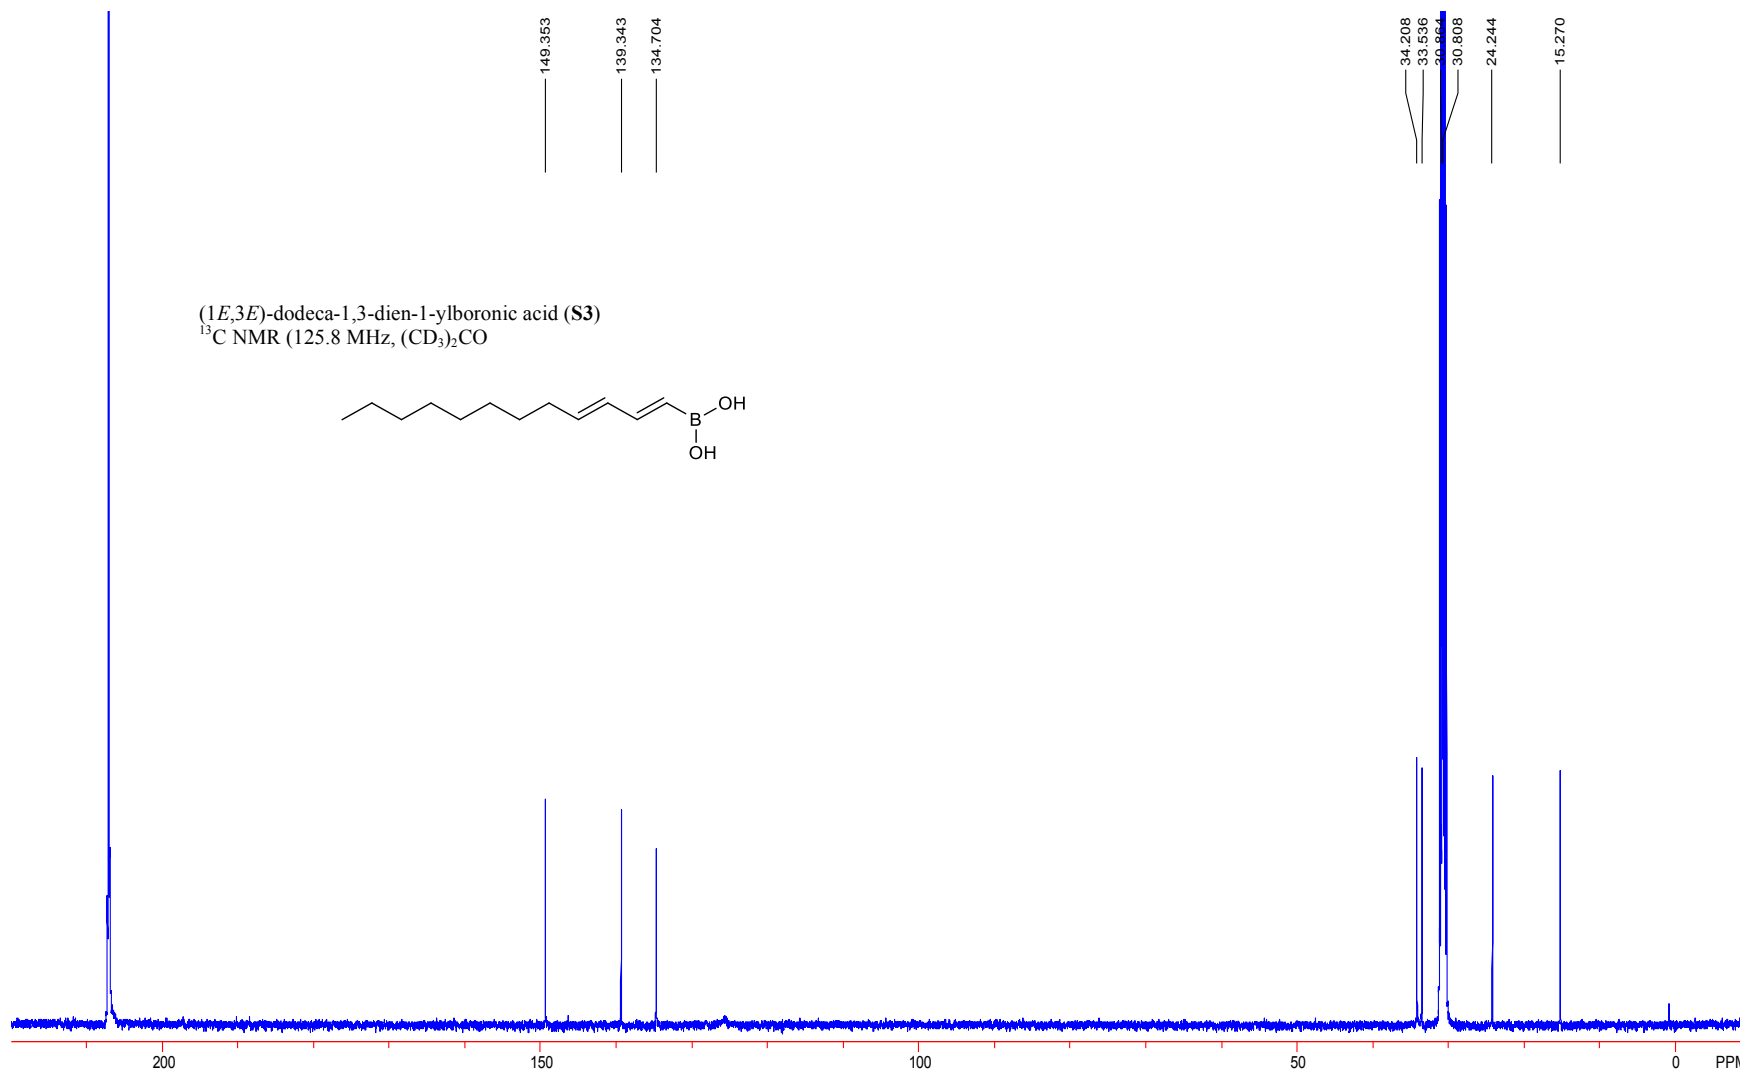

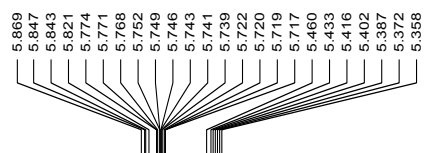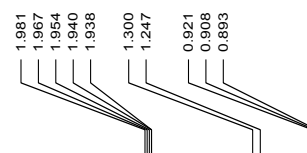

(1*E*,3*E*)-1-azidododeca-1,3-diene (**5k**)  
<sup>1</sup>H NMR (499.8 MHz, C<sub>6</sub>D<sub>6</sub>)

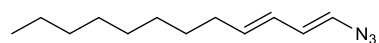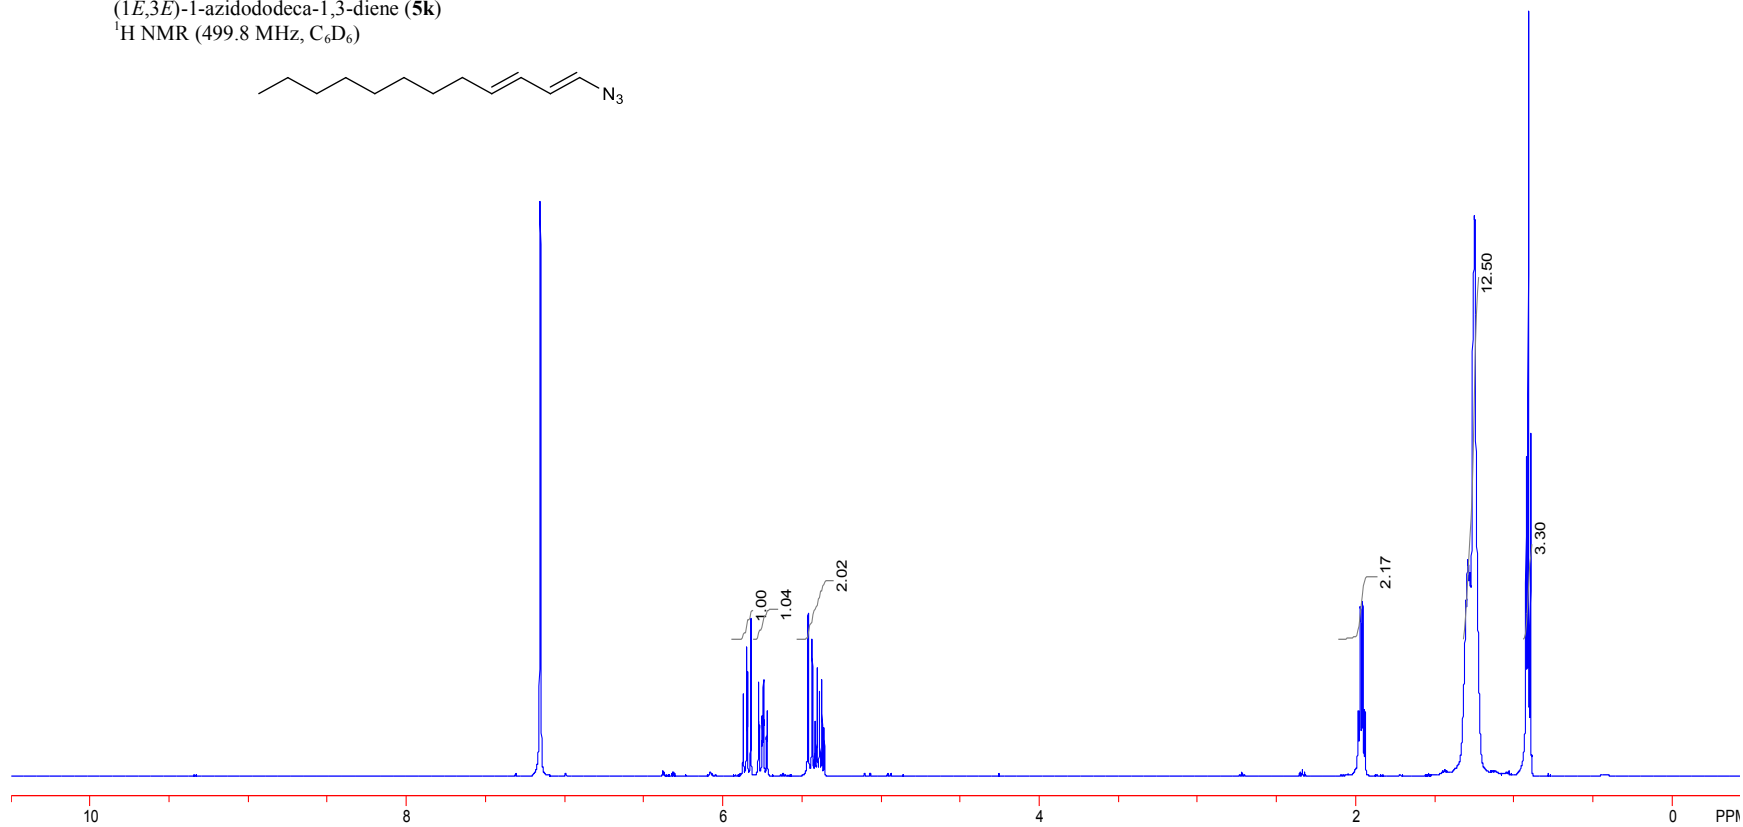

(1*E*,3*E*)-1-azidododeca-1,3-diene (**5k**)  
<sup>13</sup>C NMR (125.7 MHz, C<sub>6</sub>D<sub>6</sub>)

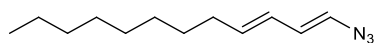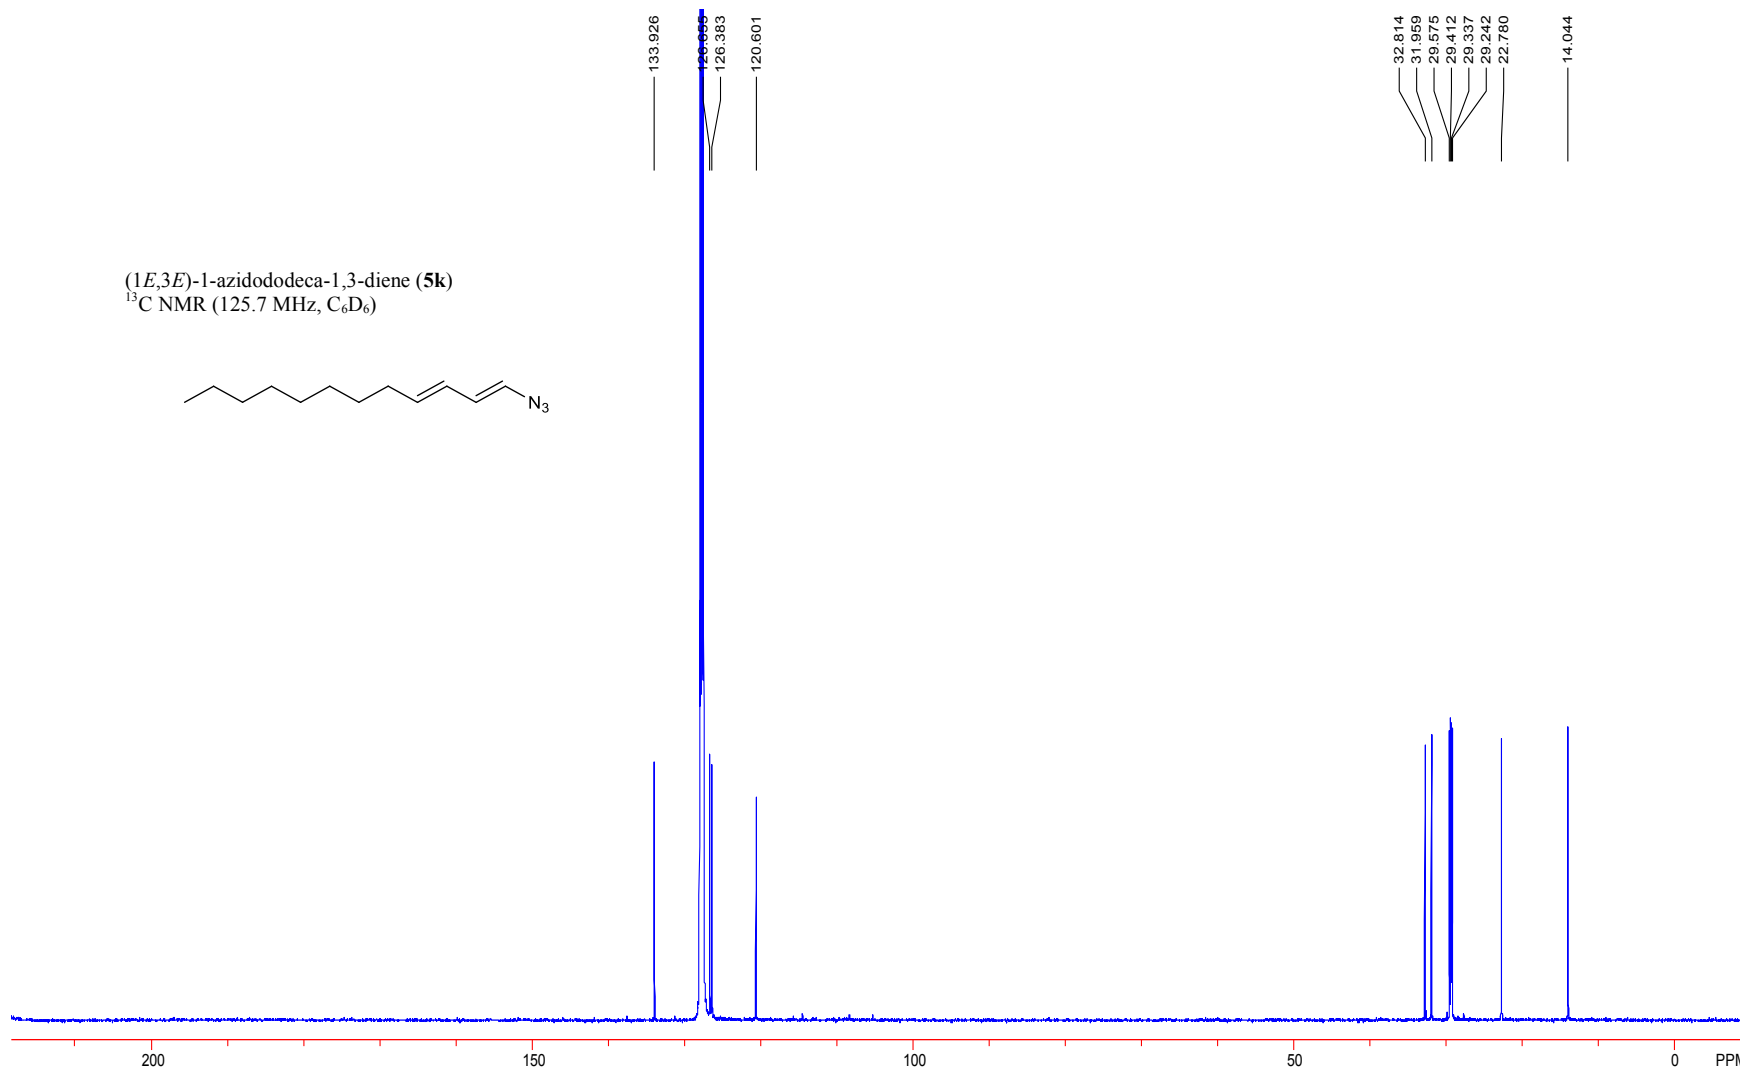

7.930  
7.913  
7.720  
7.704  
7.632  
7.615  
7.601  
7.586  
7.428  
7.413  
7.401  
7.368  
7.331  
7.317  
7.302  
7.273  
7.243  
7.014  
6.997  
6.959

4.134

(*E*)-1-styrylnaphthalen-2-amine (**S4**)  
<sup>1</sup>H NMR (500.0 MHz, CDCl<sub>3</sub>)

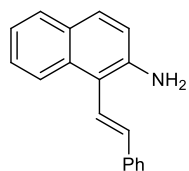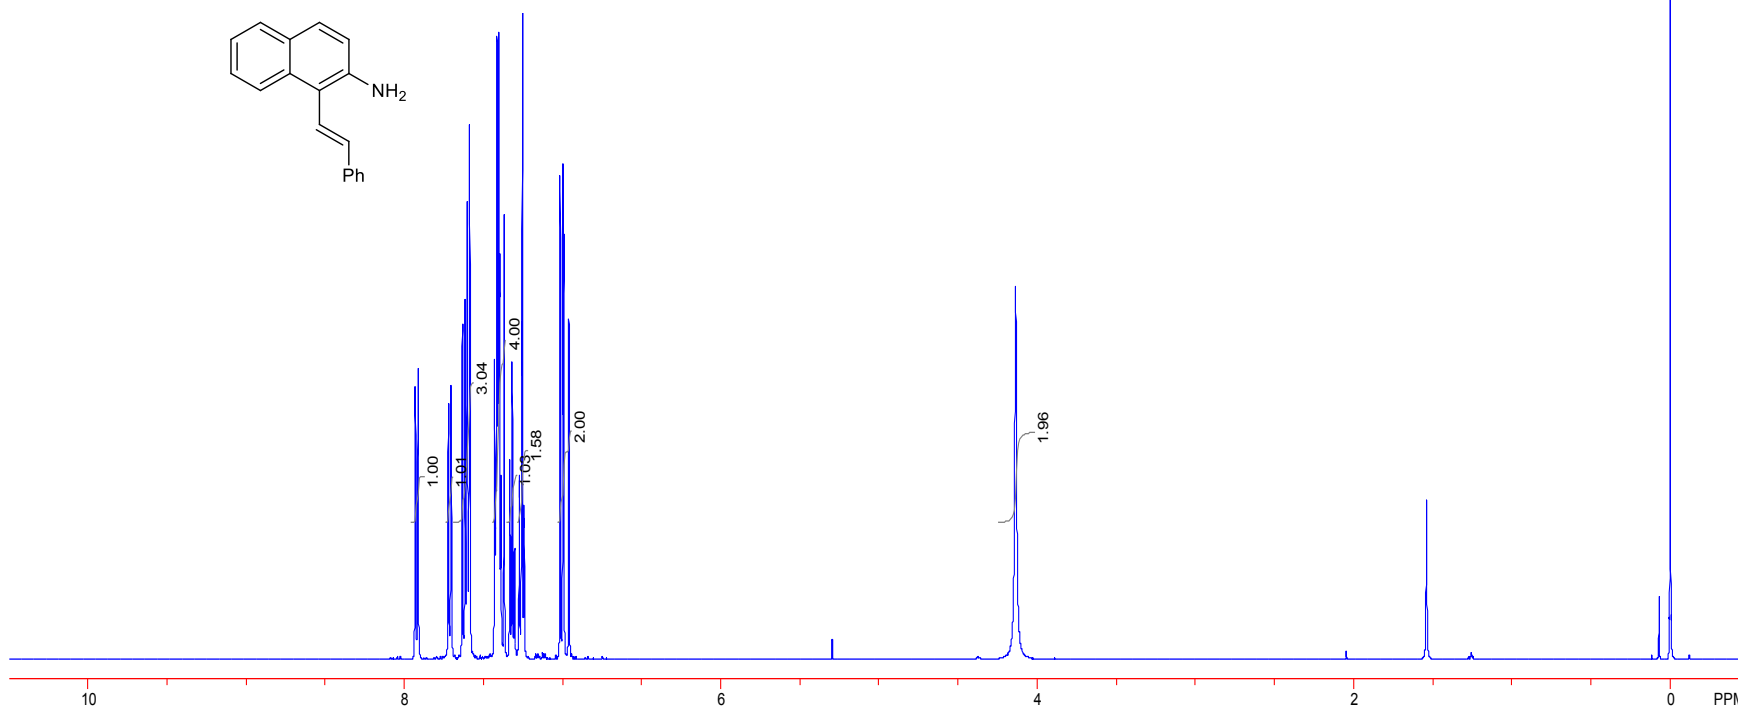

(*E*)-1-styrylnaphthalen-2-amine (**S4**)  
<sup>13</sup>C NMR (125.7 MHz, CDCl<sub>3</sub>)

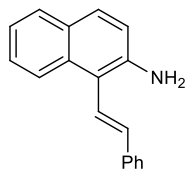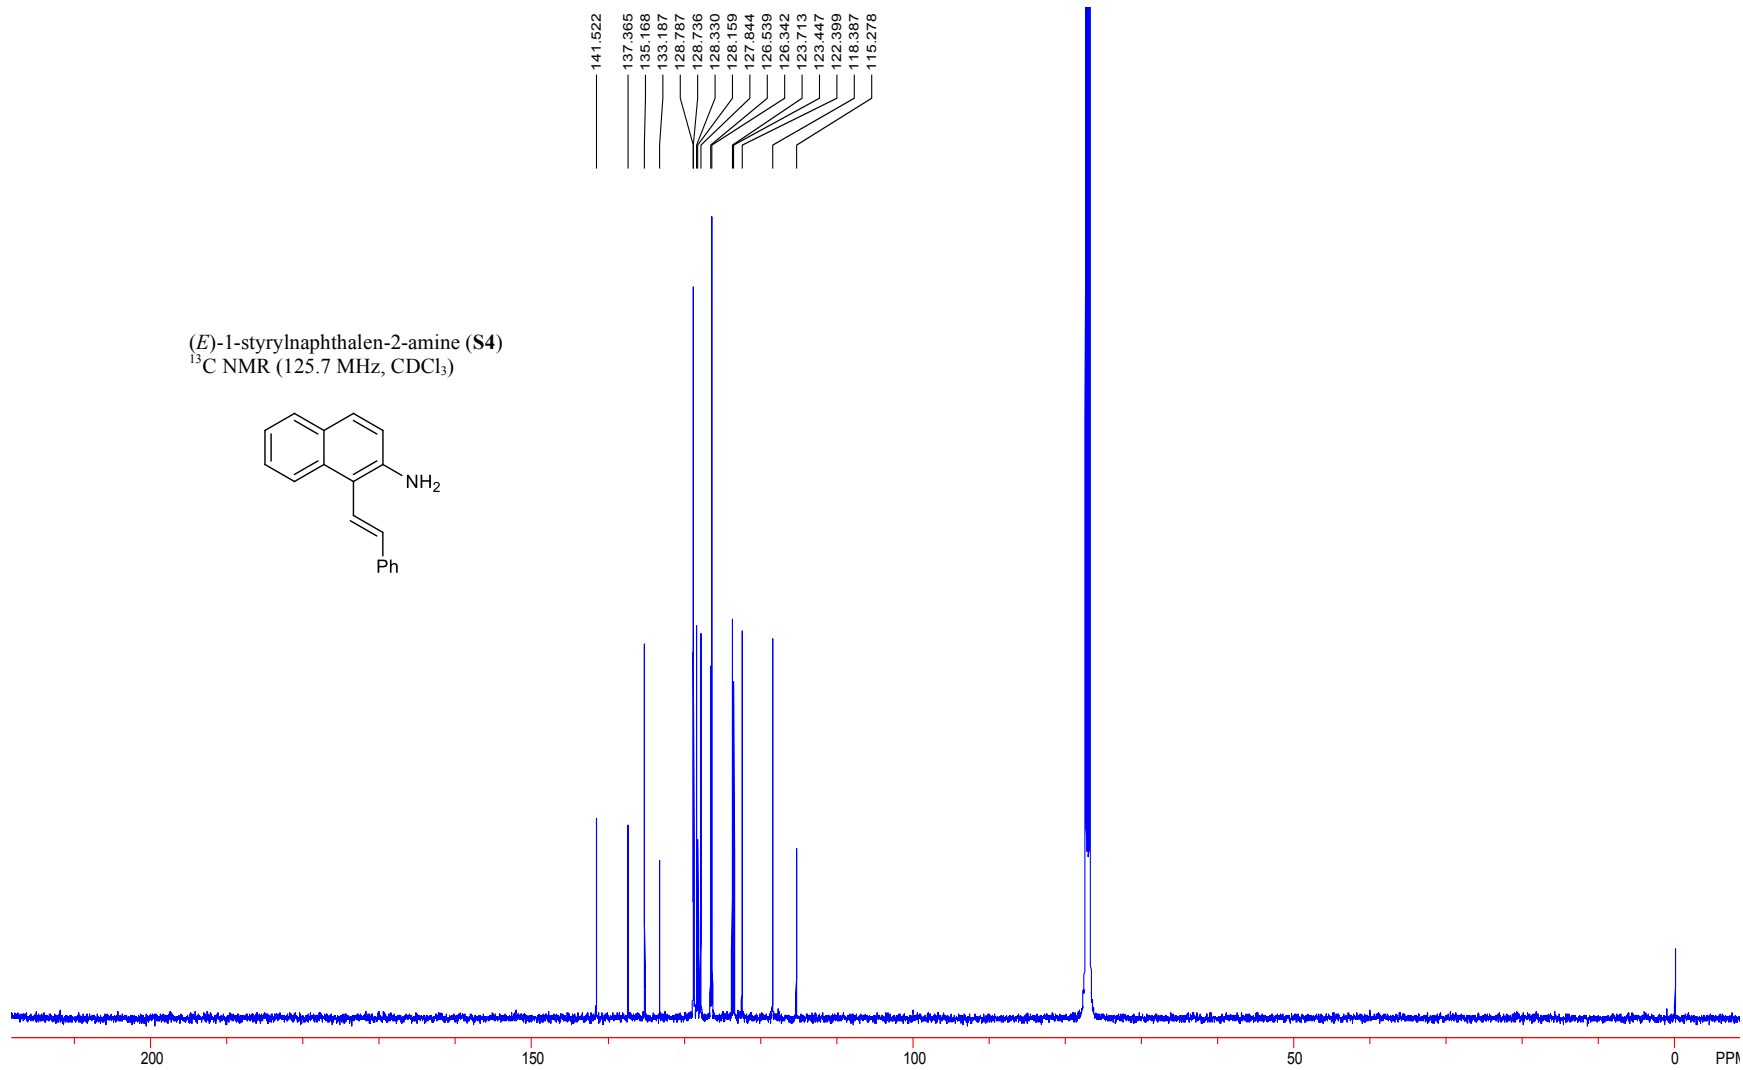

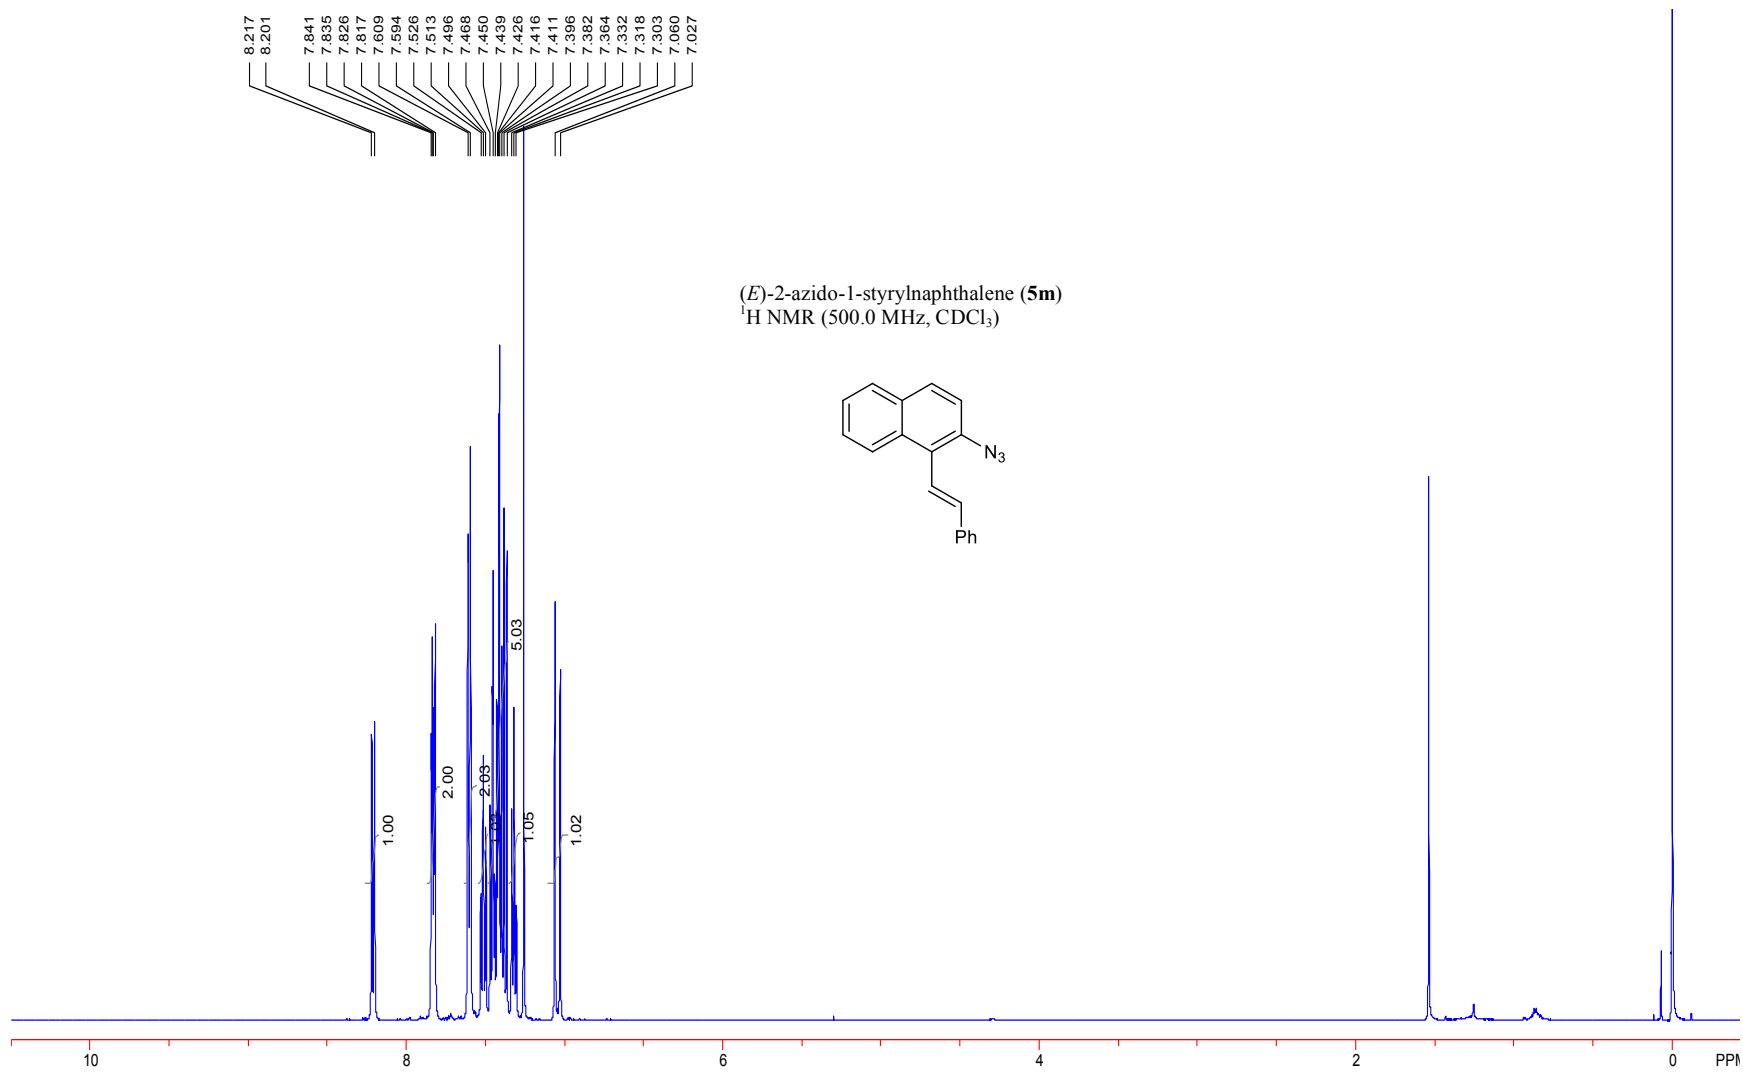



(*E*)-2-azido-1-styrylnaphthalene (**5m**)  
<sup>13</sup>C NMR (125.7 MHz, CDCl<sub>3</sub>)

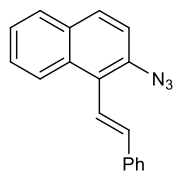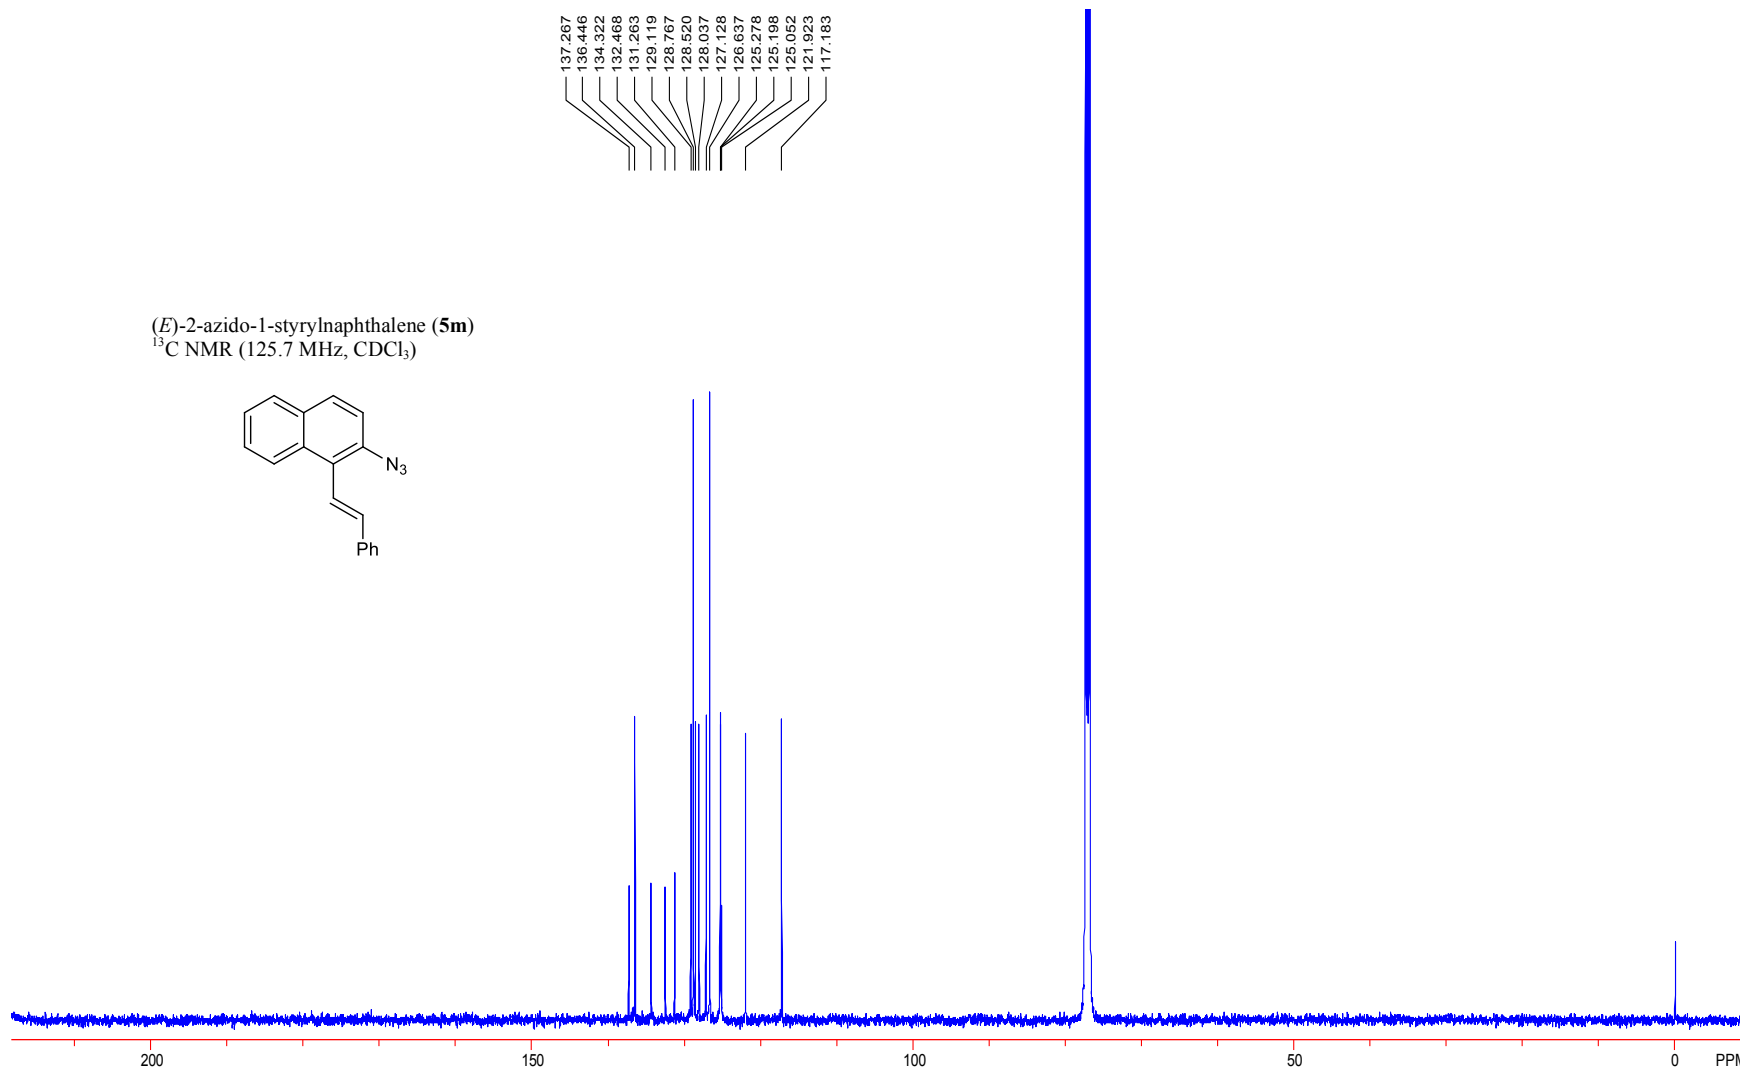

1-allyl-2-azidonaphthalene (**15**)  
<sup>1</sup>H NMR (500.0 MHz, CDCl<sub>3</sub>)

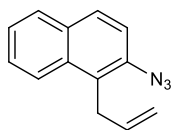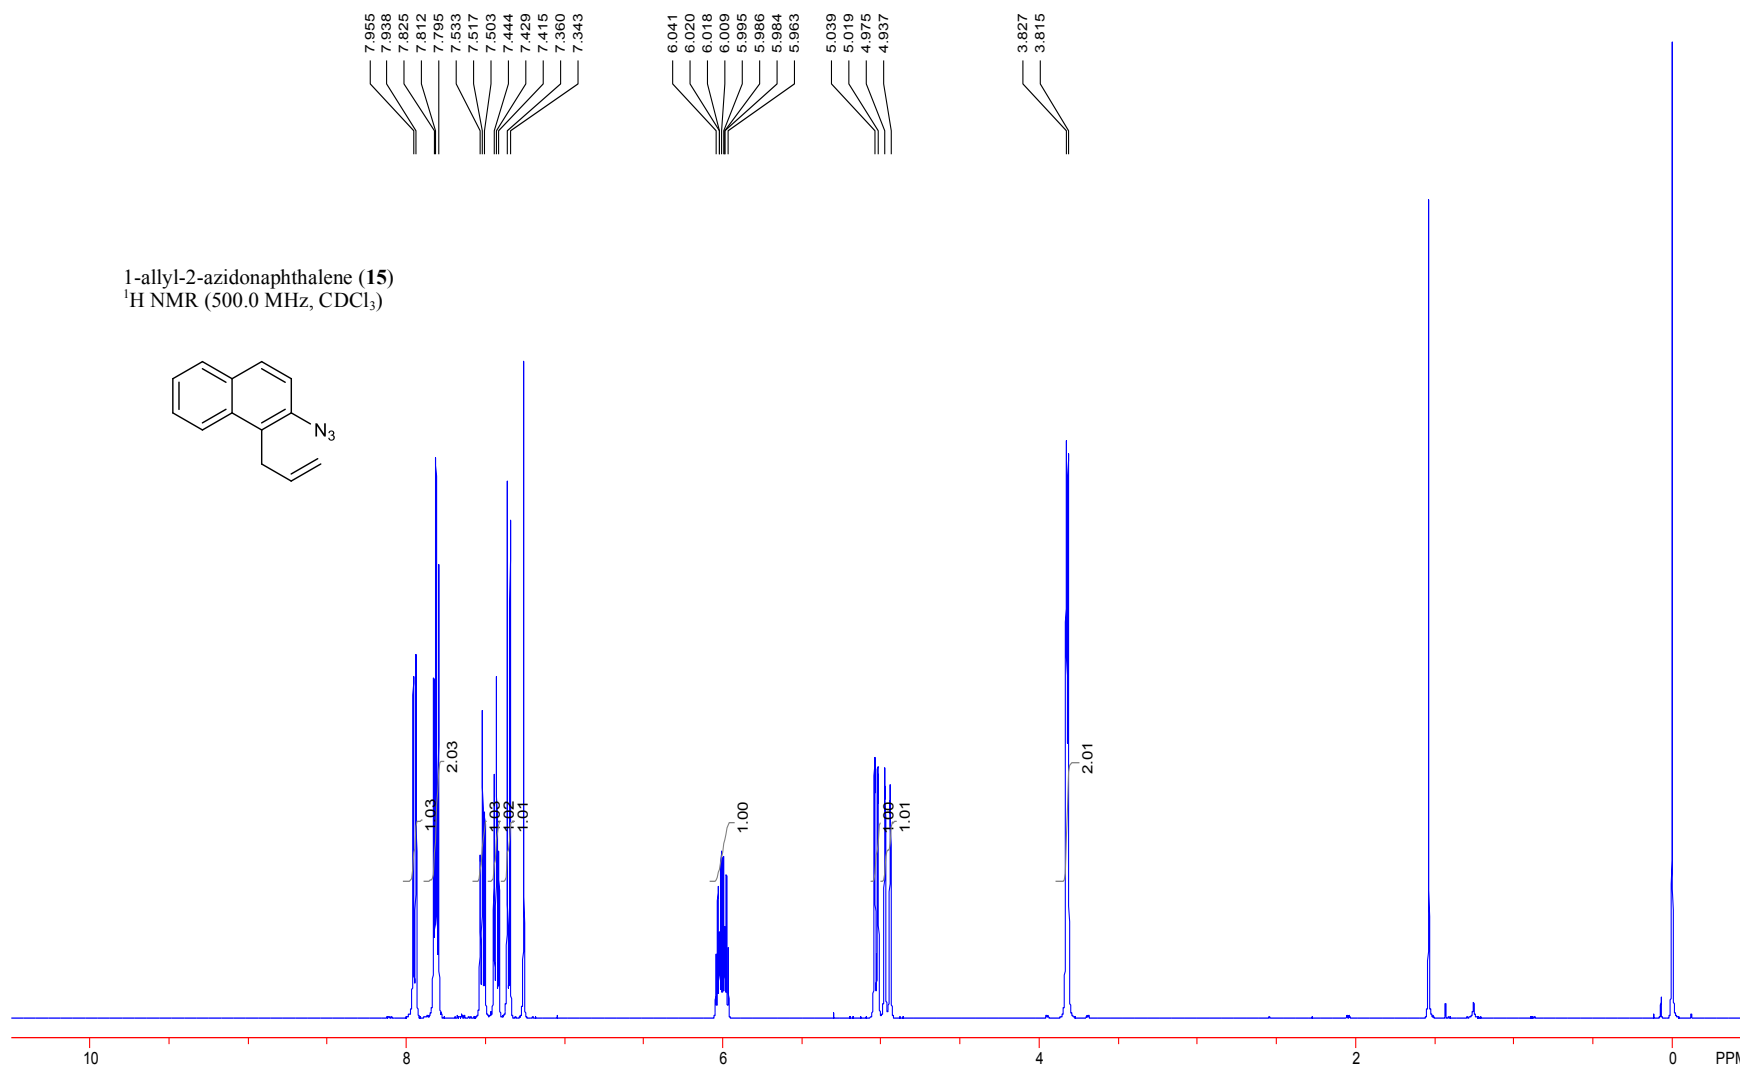

1-allyl-2-azidonaphthalene (**15**)  
<sup>13</sup>C NMR (125.7 MHz, CDCl<sub>3</sub>)

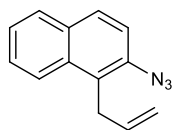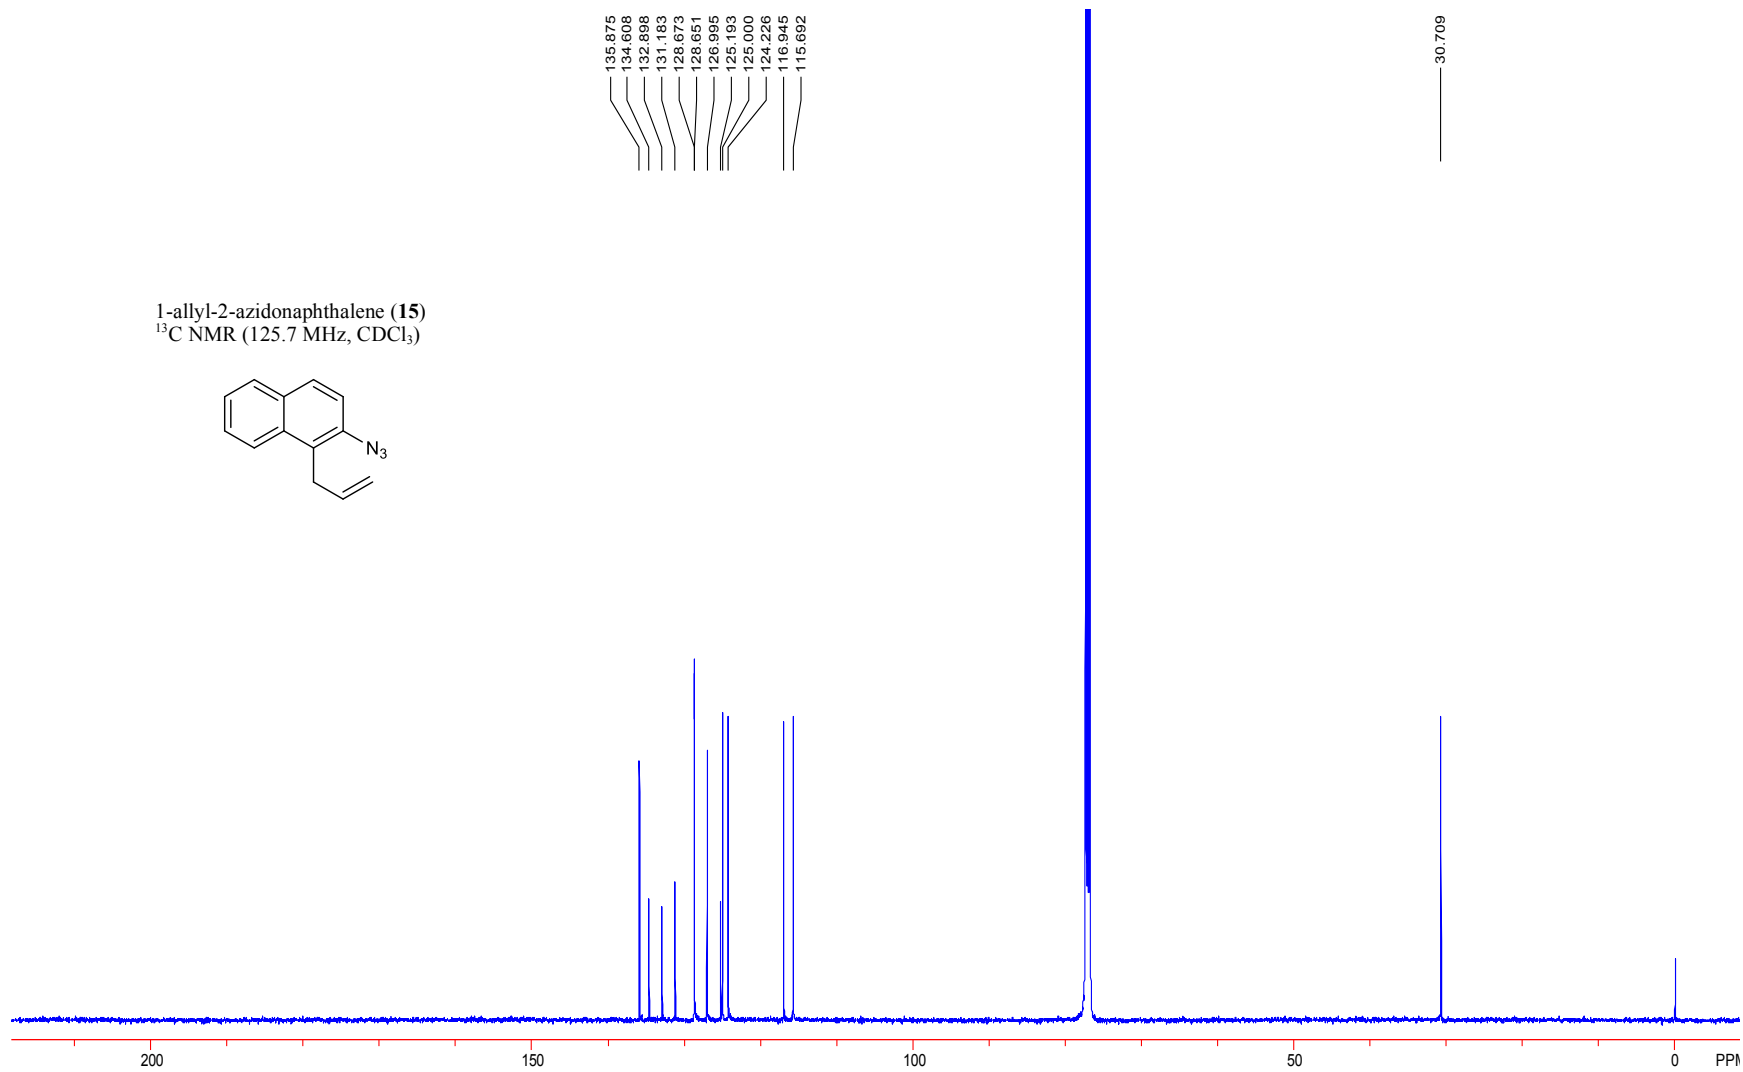

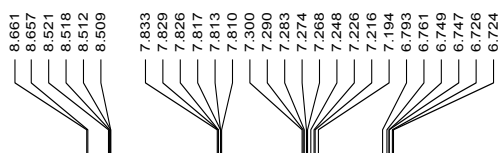

Methyl 5-(pyridin-3-yl)-1H-pyrrole-2-carboxylate (**6e**)  
<sup>1</sup>H NMR (500.2 MHz, CDCl<sub>3</sub>)

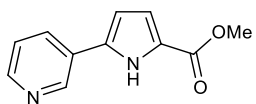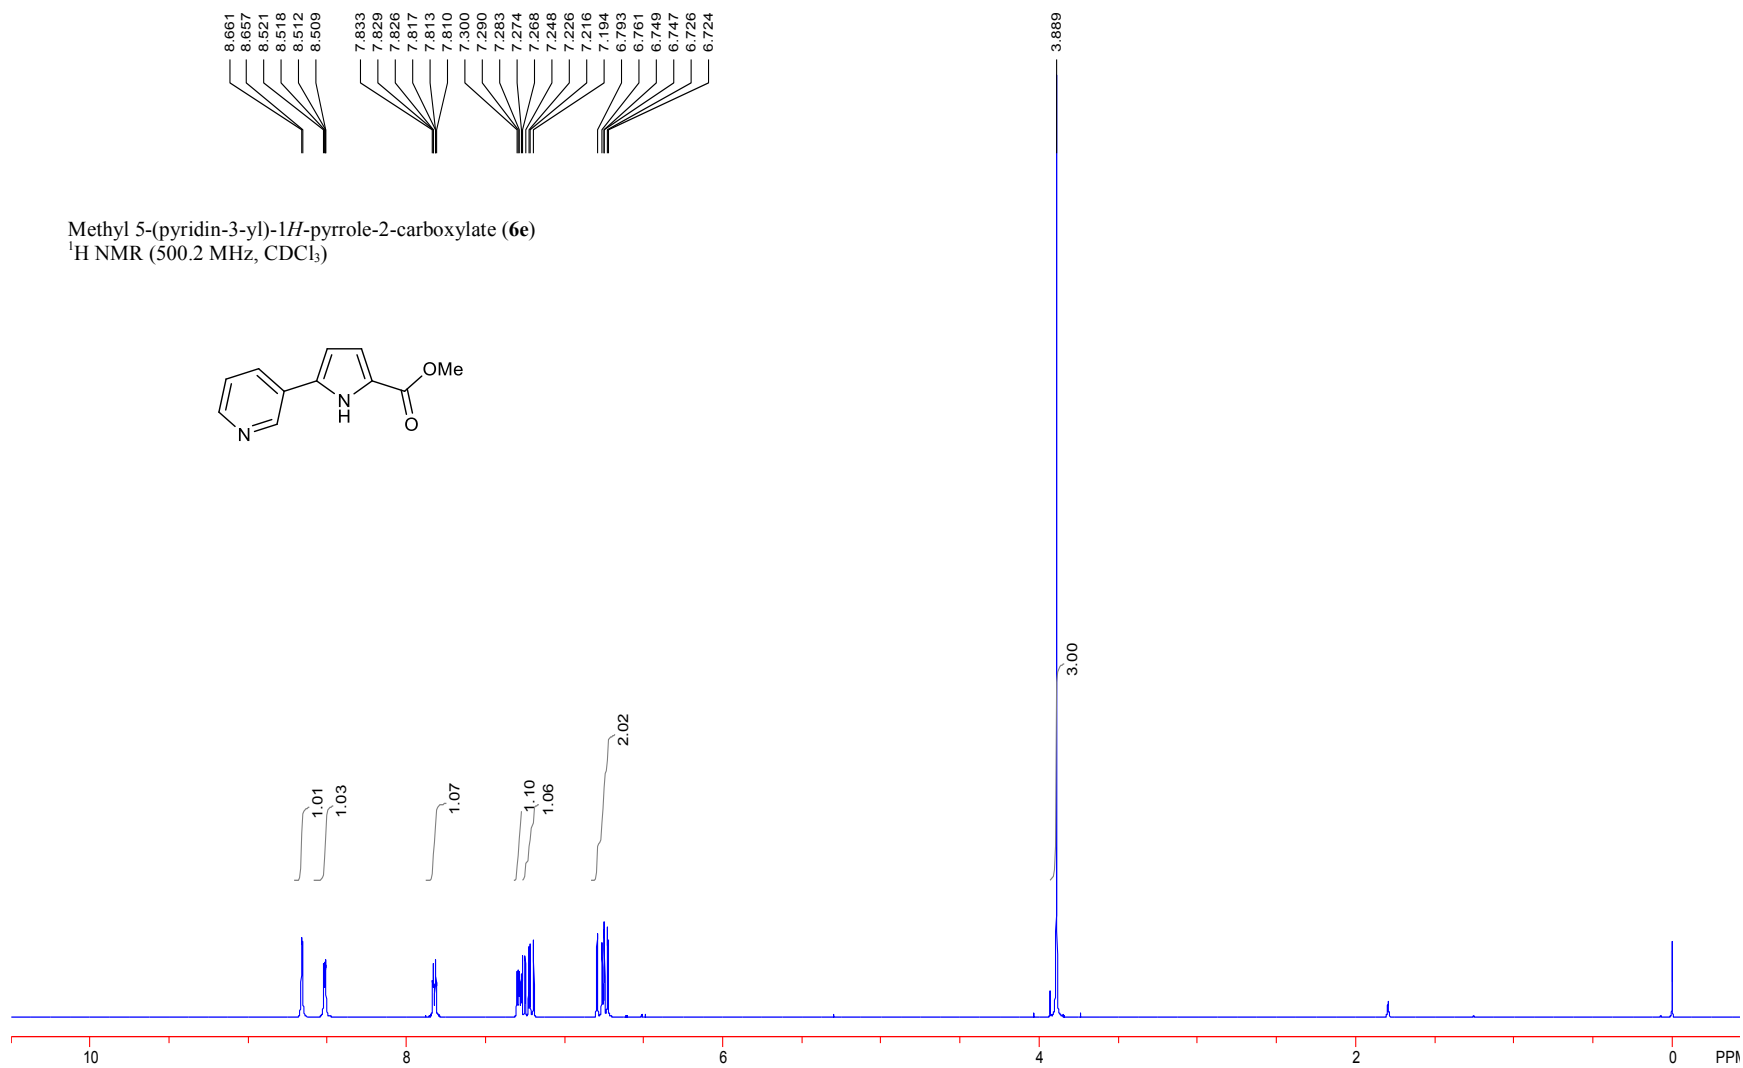

Methyl 5-(pyridin-3-yl)-1H-pyrrole-2-carboxylate (**6e**)  
<sup>13</sup>C NMR (125.8 MHz, CDCl<sub>3</sub>)

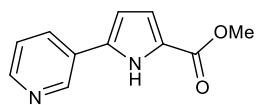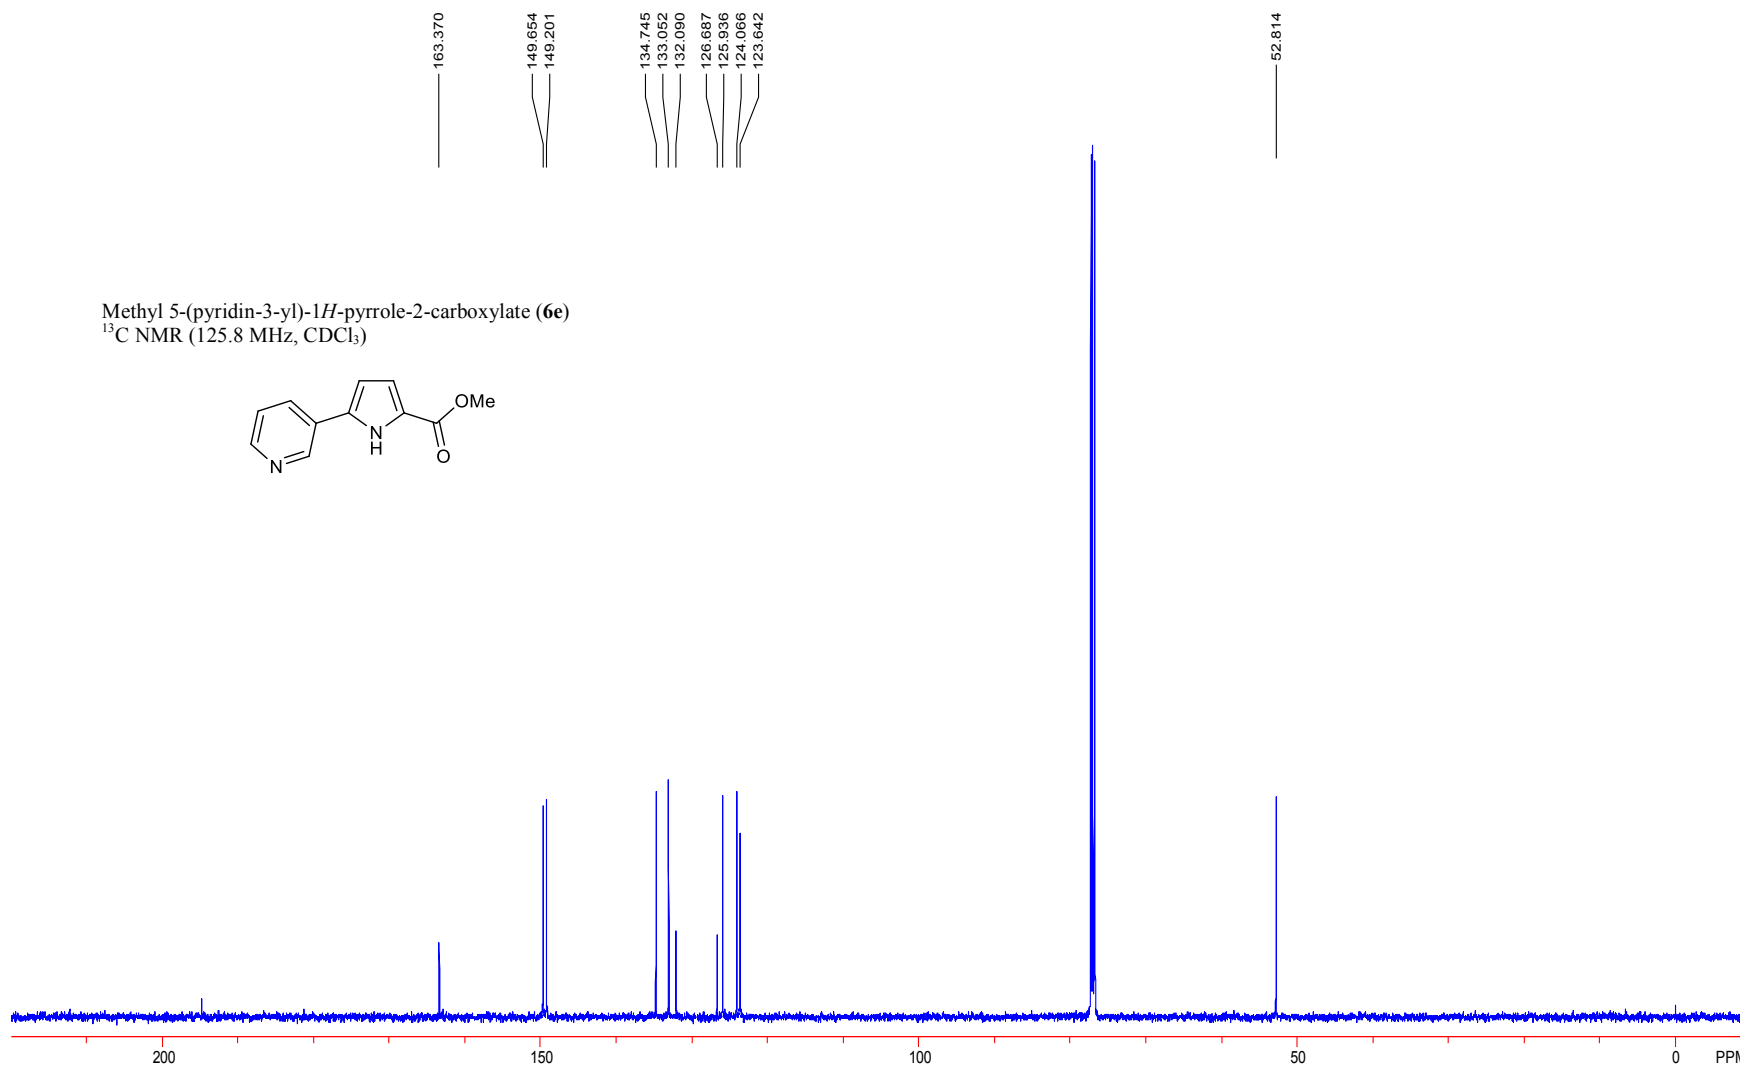

Methyl 5-isopropyl-1*H*-pyrrole-2-carboxylate (**6f**)  
<sup>1</sup>H NMR (500.2 MHz, CDCl<sub>3</sub>)

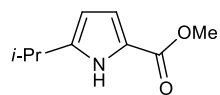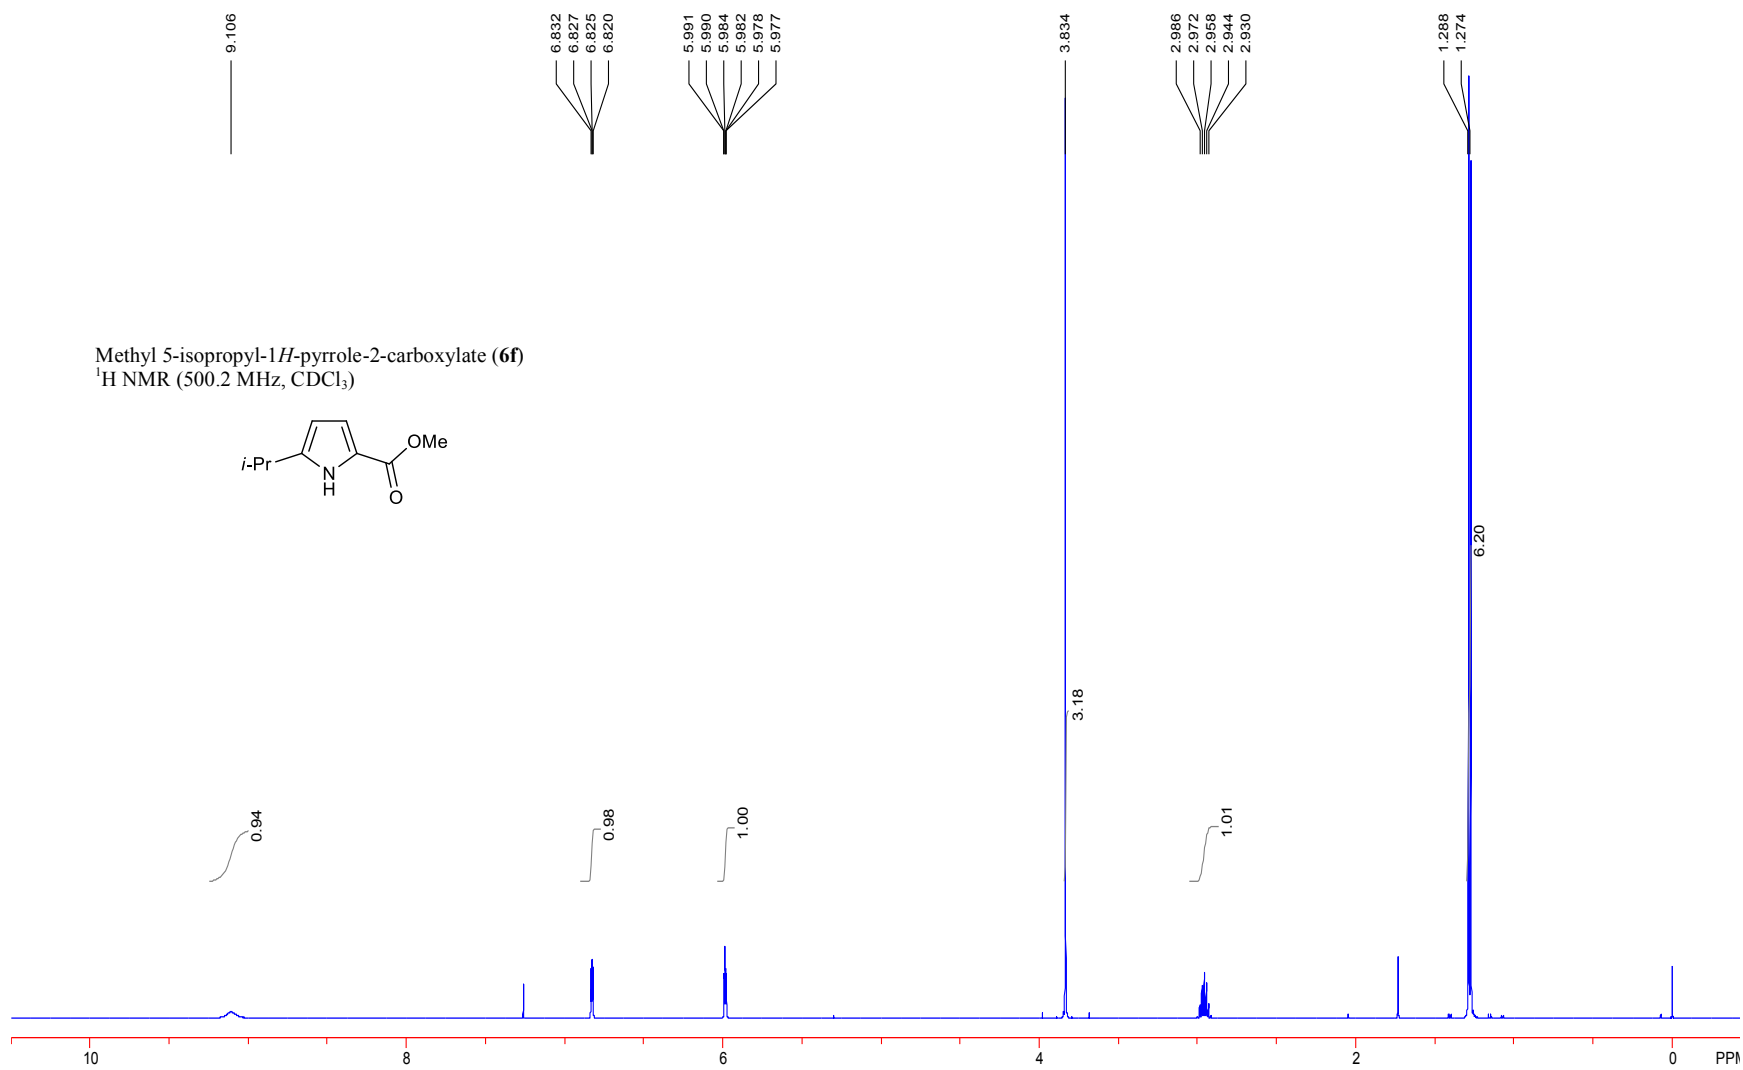

Methyl 5-isopropyl-1*H*-pyrrole-2-carboxylate (**6f**)  
<sup>13</sup>C NMR (125.8 MHz, CDCl<sub>3</sub>)

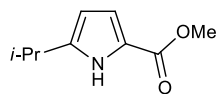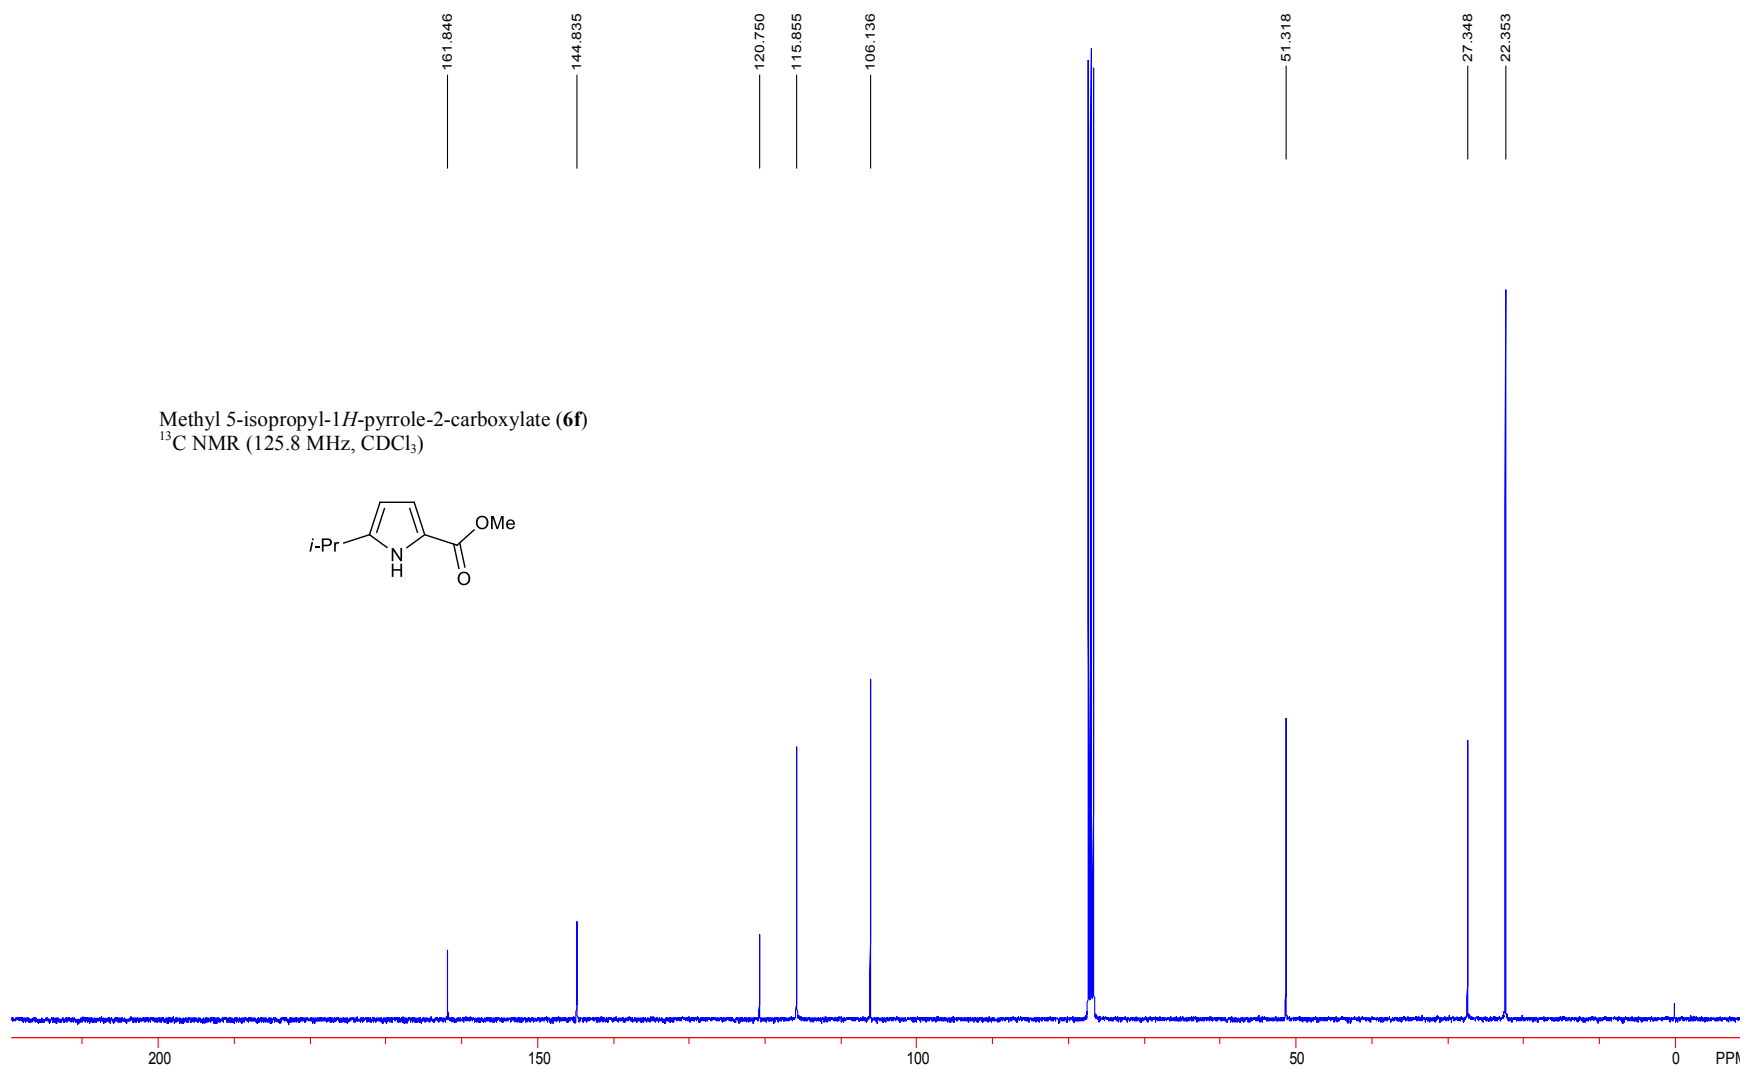

Methyl 5-(*tert*-butyl)-1*H*-pyrrole-2-carboxylate (**6g**)  
<sup>1</sup>H NMR (500.2 MHz, CDCl<sub>3</sub>)

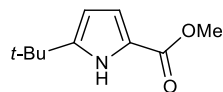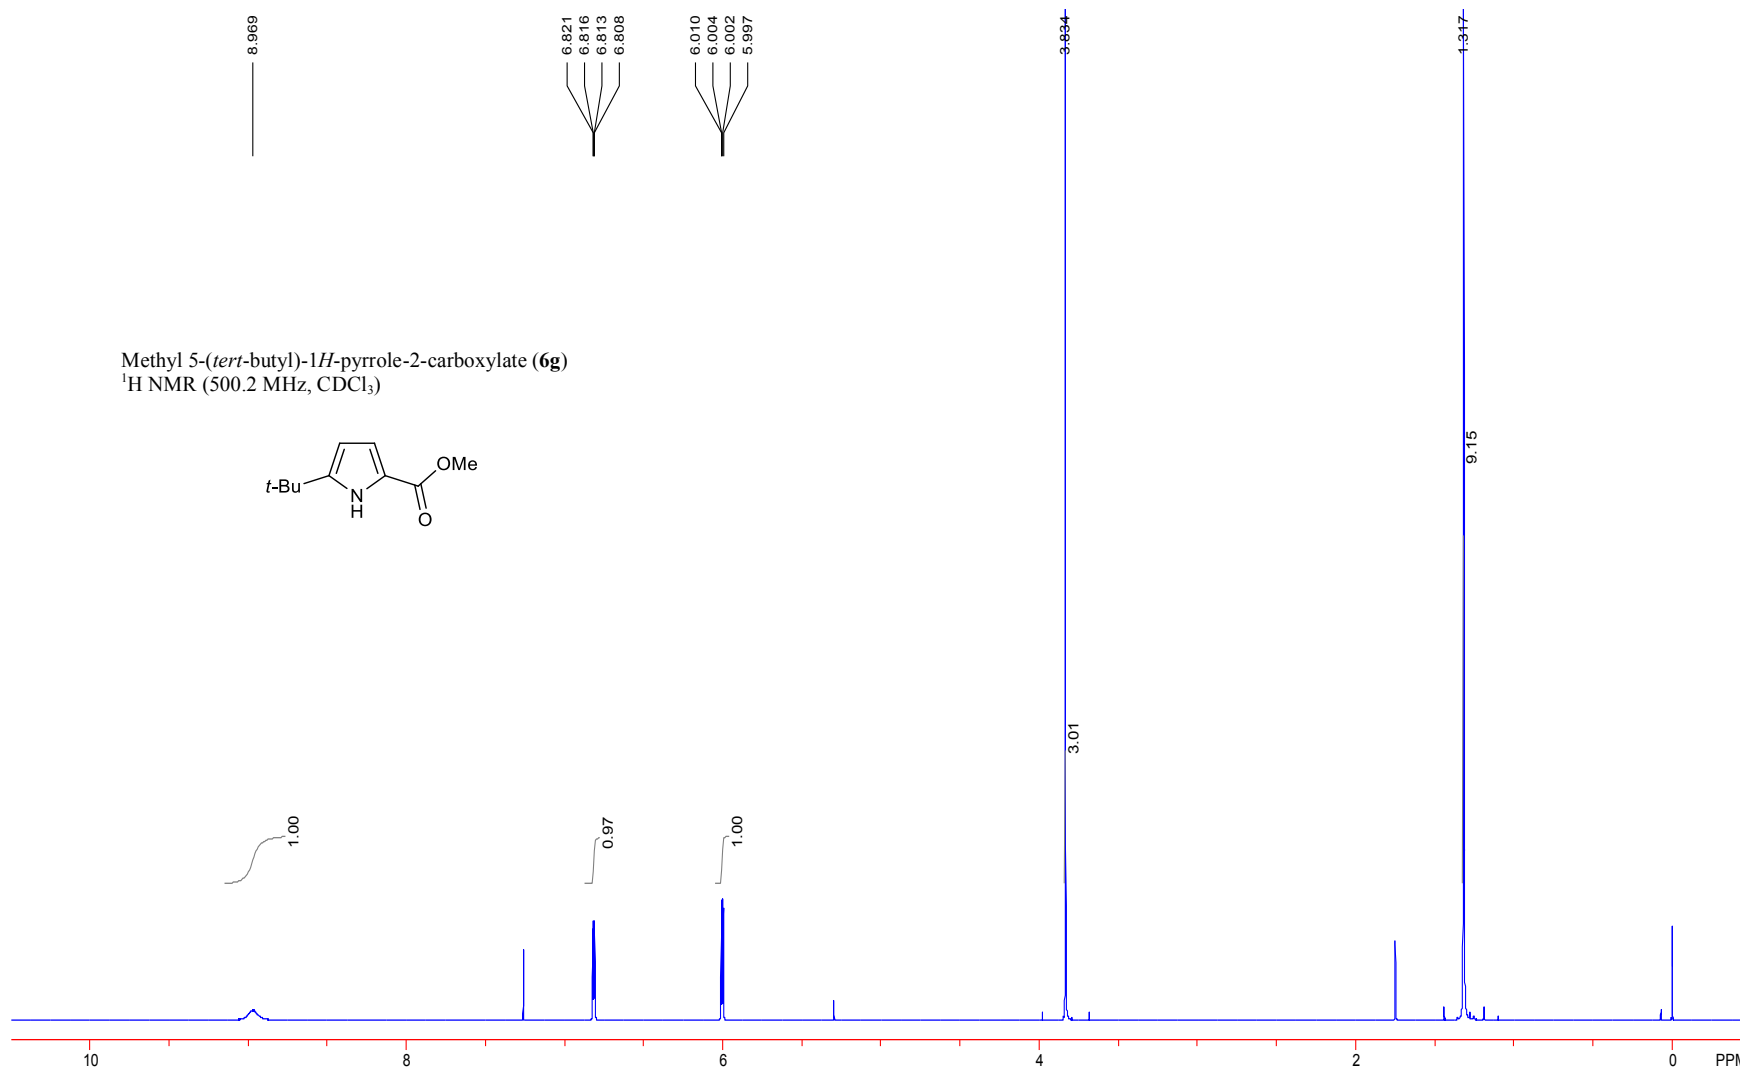



Methyl 5-(*tert*-butyl)-1*H*-pyrrole-2-carboxylate (**6g**)  
<sup>13</sup>C NMR (125.8 MHz, CDCl<sub>3</sub>)

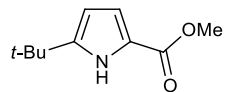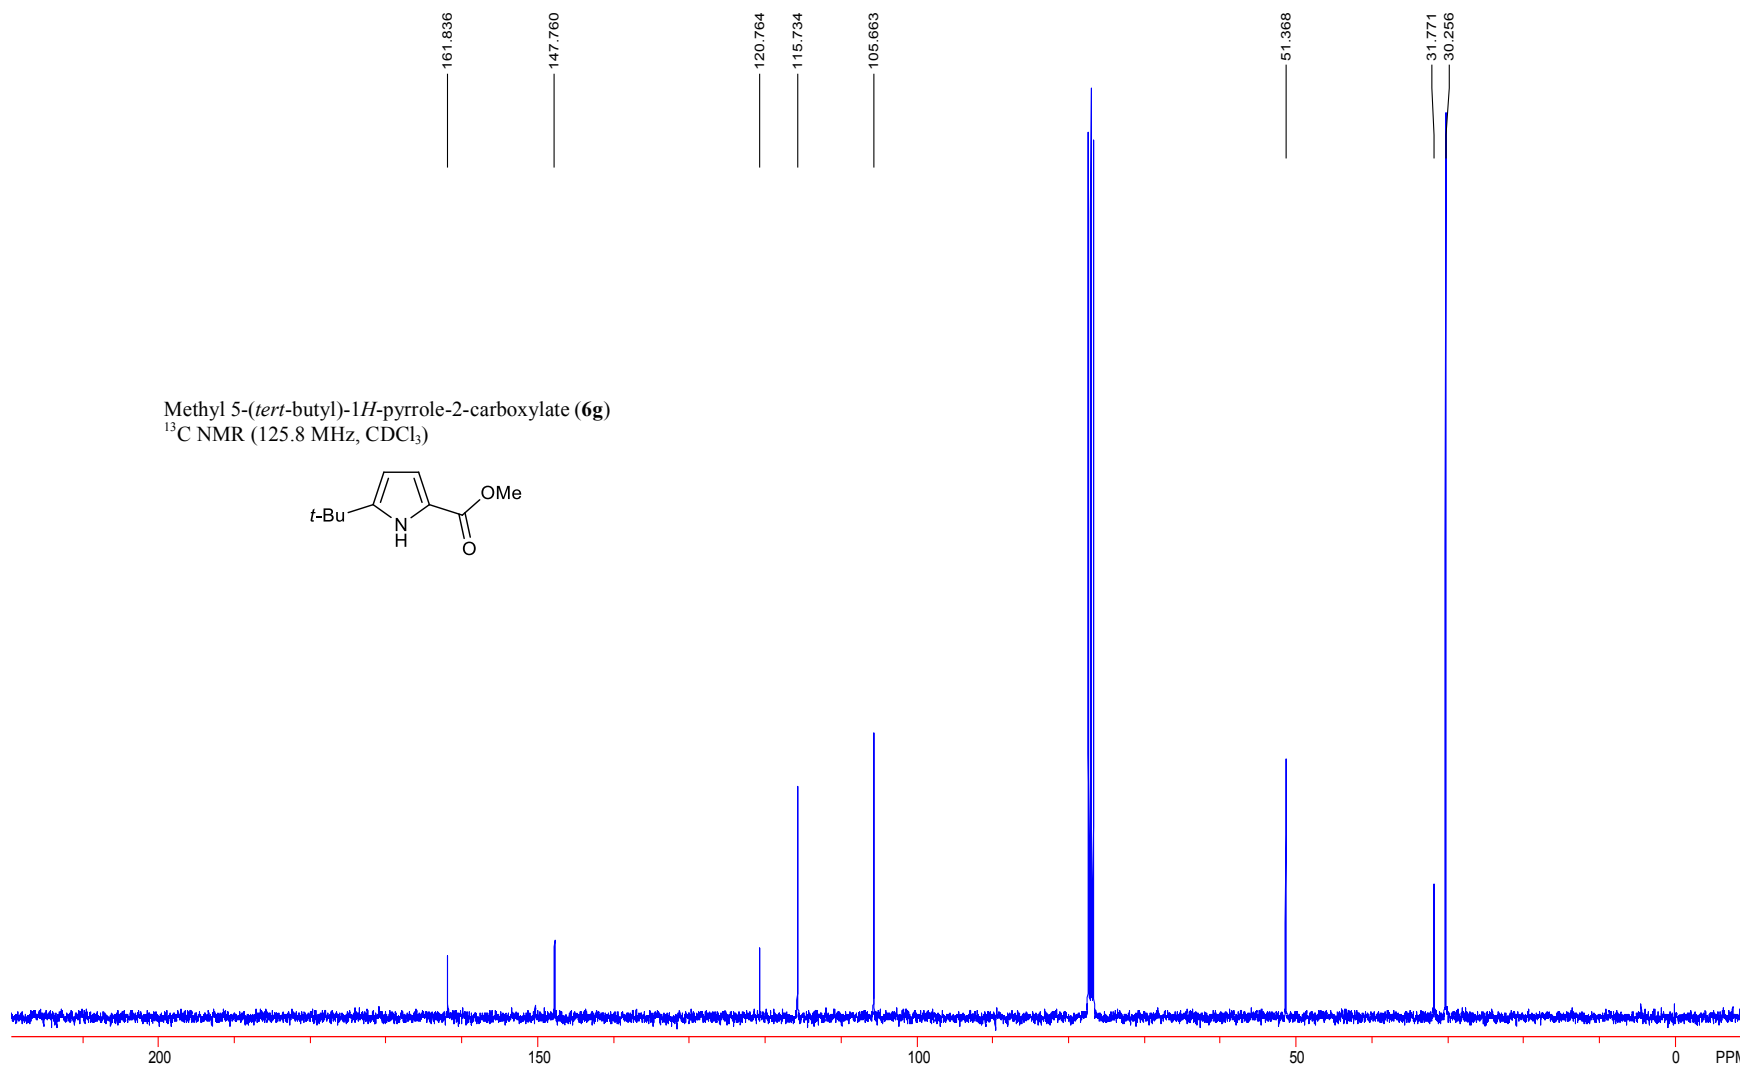

Methyl 5-vinyl-1H-pyrrole-2-carboxylate (**6h**)  
<sup>1</sup>H NMR (500.2 MHz, CDCl<sub>3</sub>)

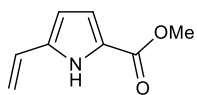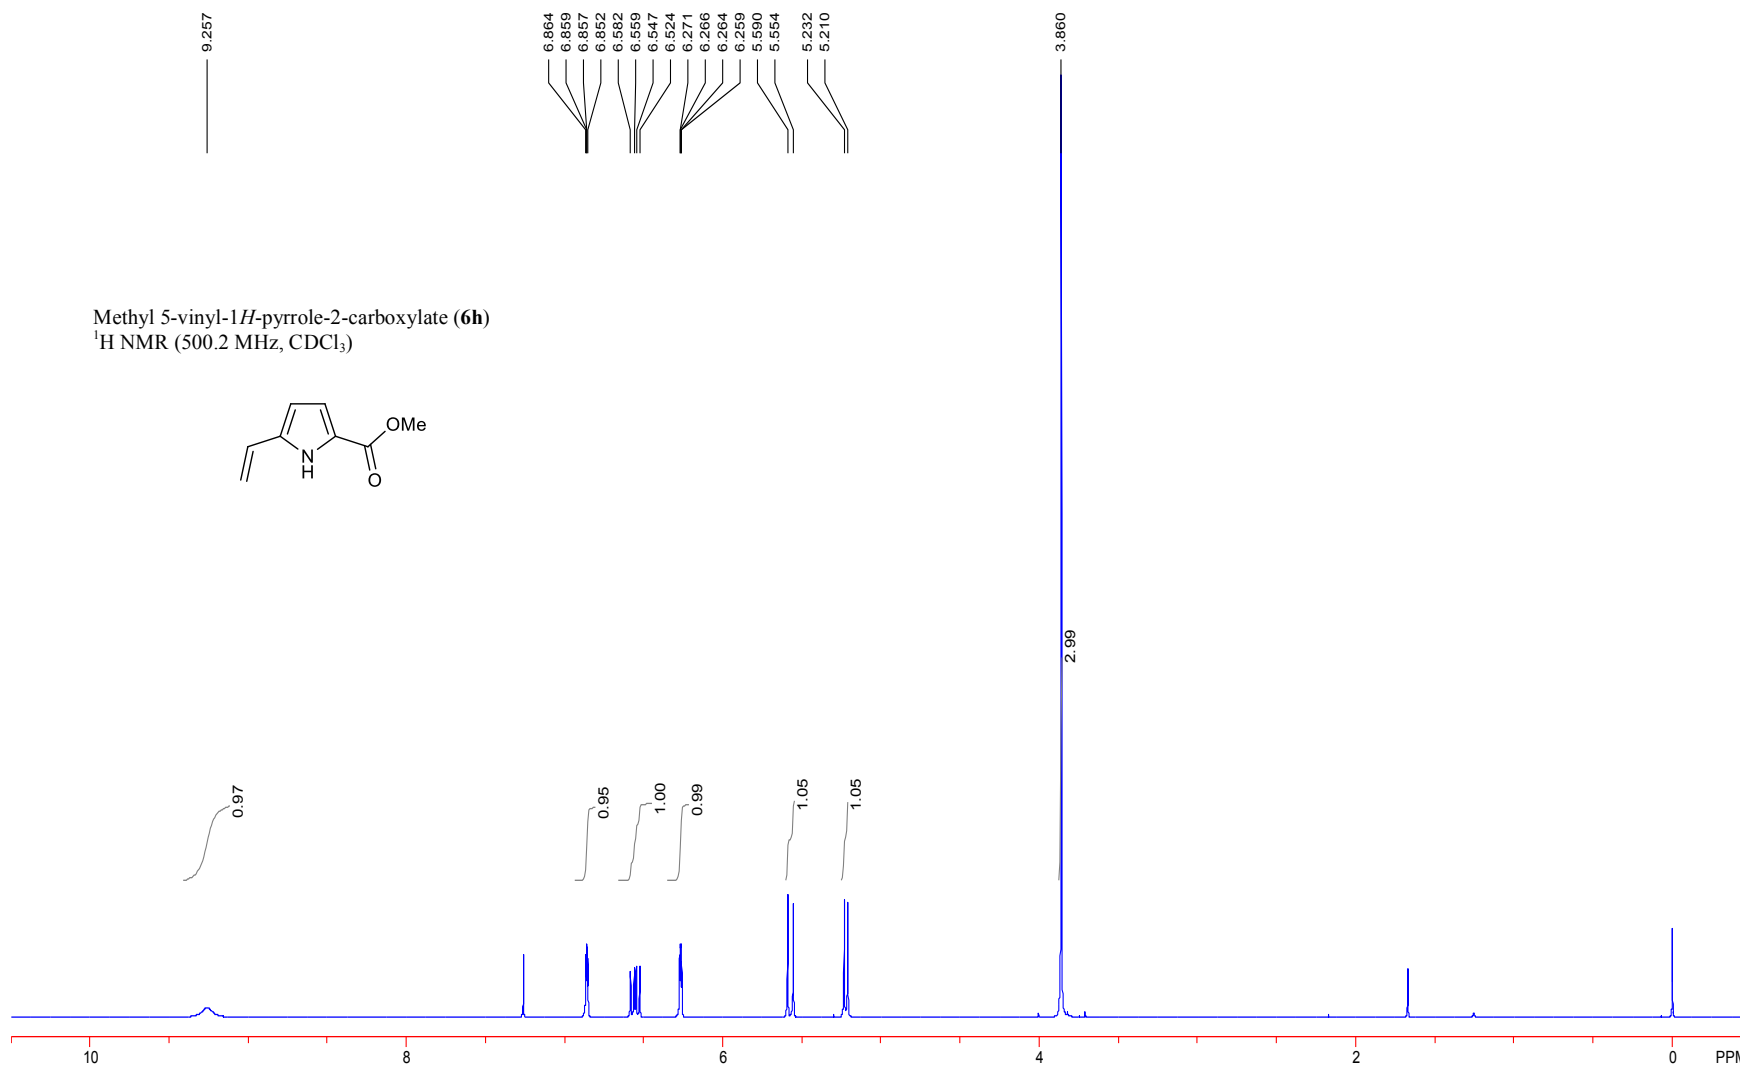

Methyl 5-vinyl-1*H*-pyrrole-2-carboxylate (**6h**)  
<sup>13</sup>C NMR (125.8 MHz, CDCl<sub>3</sub>)

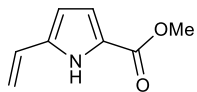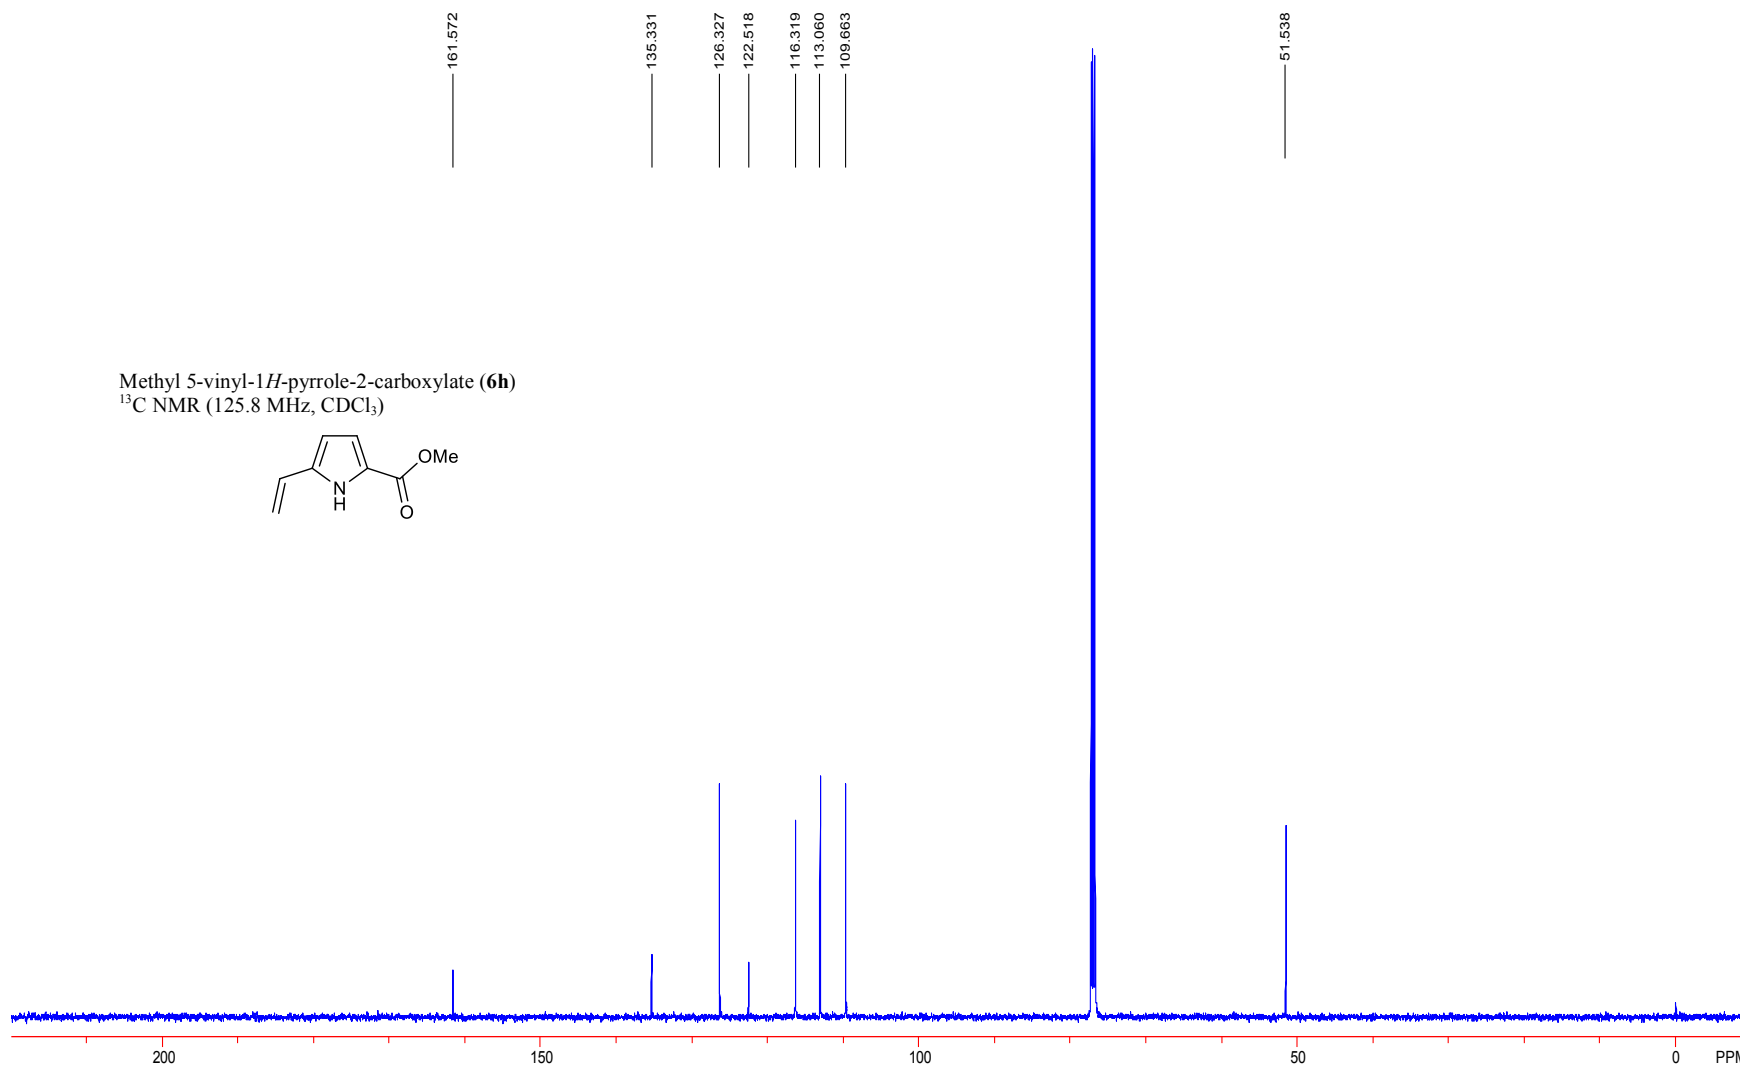

9.746

7.484  
7.476  
7.466  
7.462  
7.251  
7.237  
7.219  
7.203  
7.173  
7.170  
7.152  
7.136  
7.133  
6.779  
6.774

3.898

2.956  
2.938  
2.918  
2.765  
2.745  
2.727

Methyl 4,5-dihydro-1*H*-benzo[*g*]indole-2-carboxylate (**6i**)  
<sup>1</sup>H NMR (500.2 MHz, CDCl<sub>3</sub>)

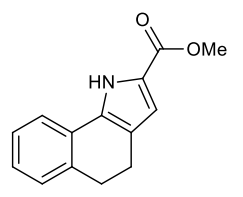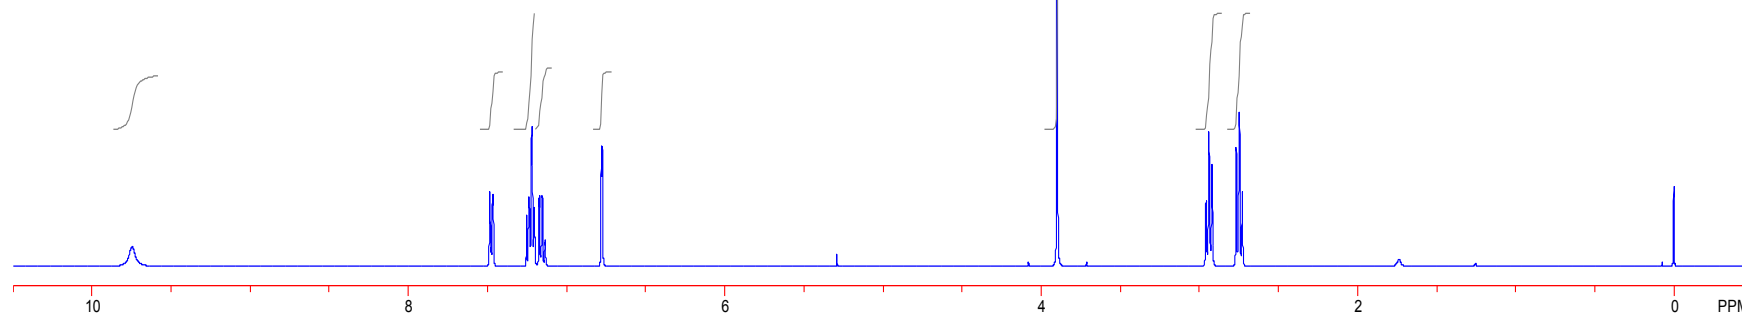

Methyl 4,5-dihydro-1*H*-benzo[*g*]indole-2-carboxylate (**6i**)  
<sup>13</sup>C NMR (125.7 MHz, CDCl<sub>3</sub>)

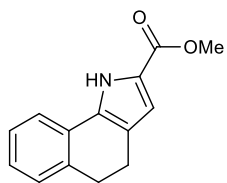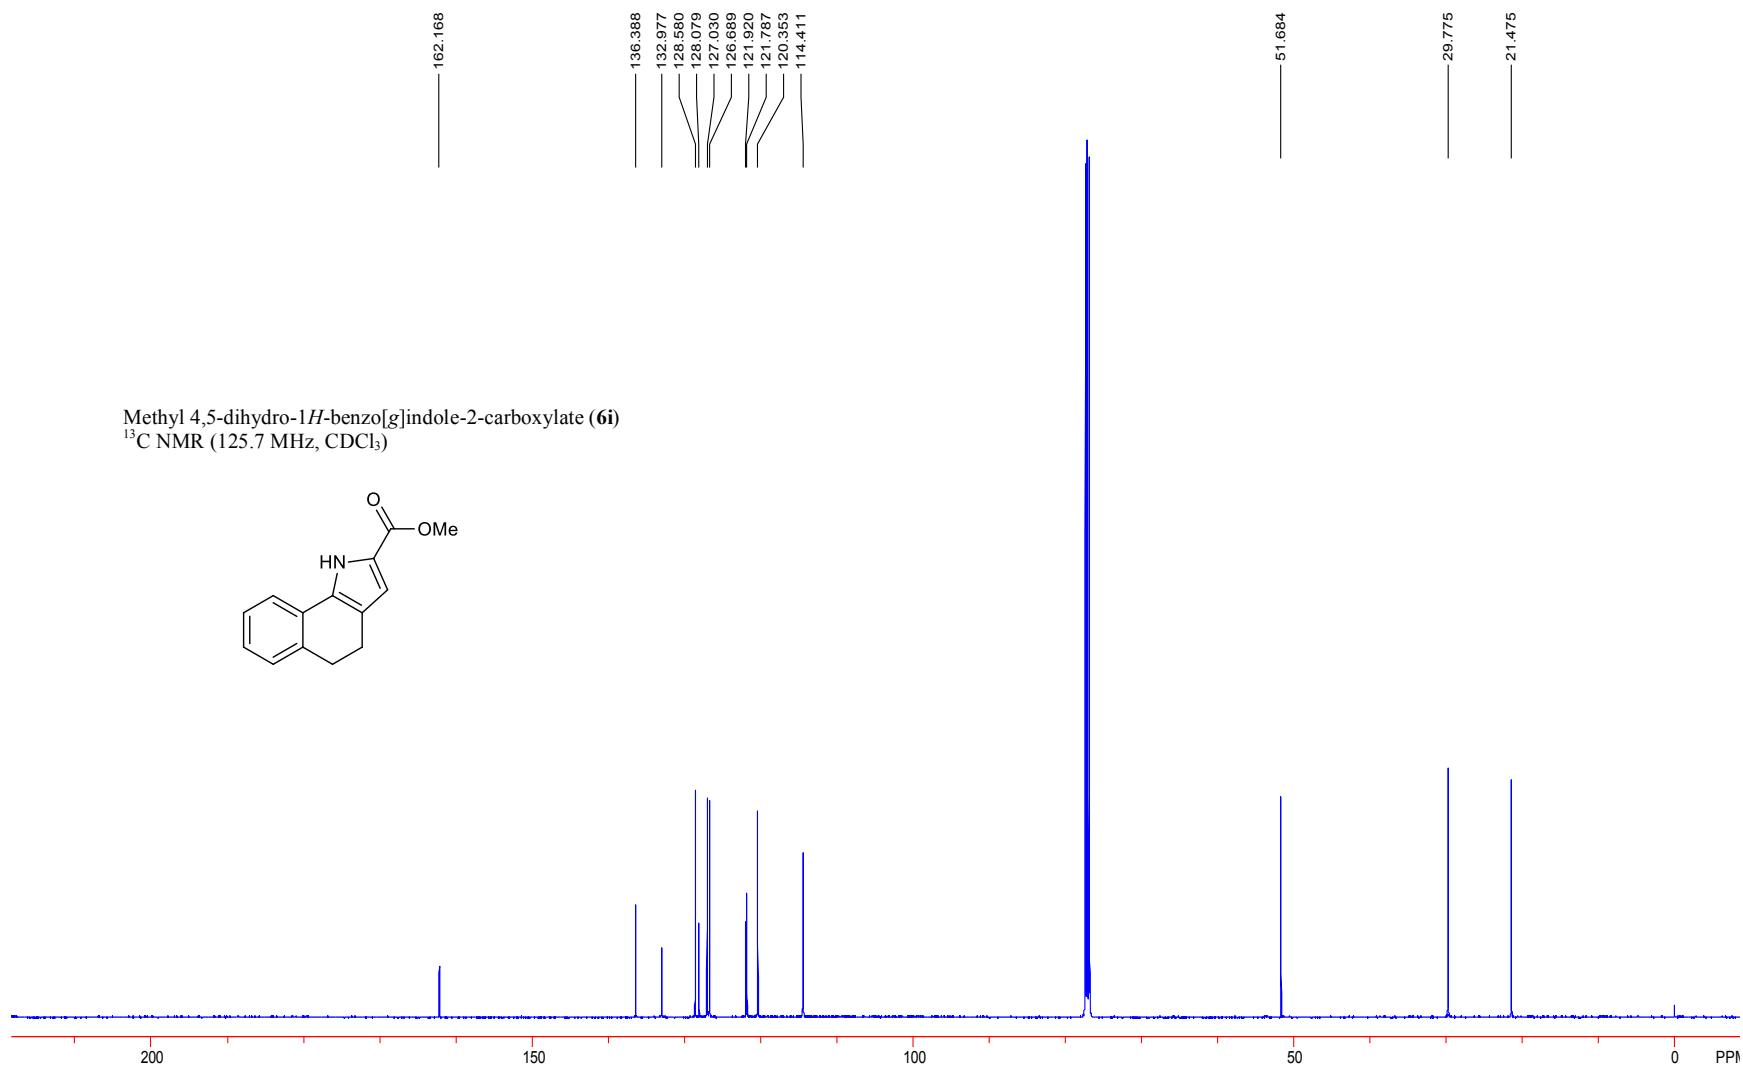

2-octyl-1H-pyrrole (**6k**)  
<sup>1</sup>H NMR (499.8 MHz, CDCl<sub>3</sub>)

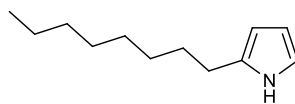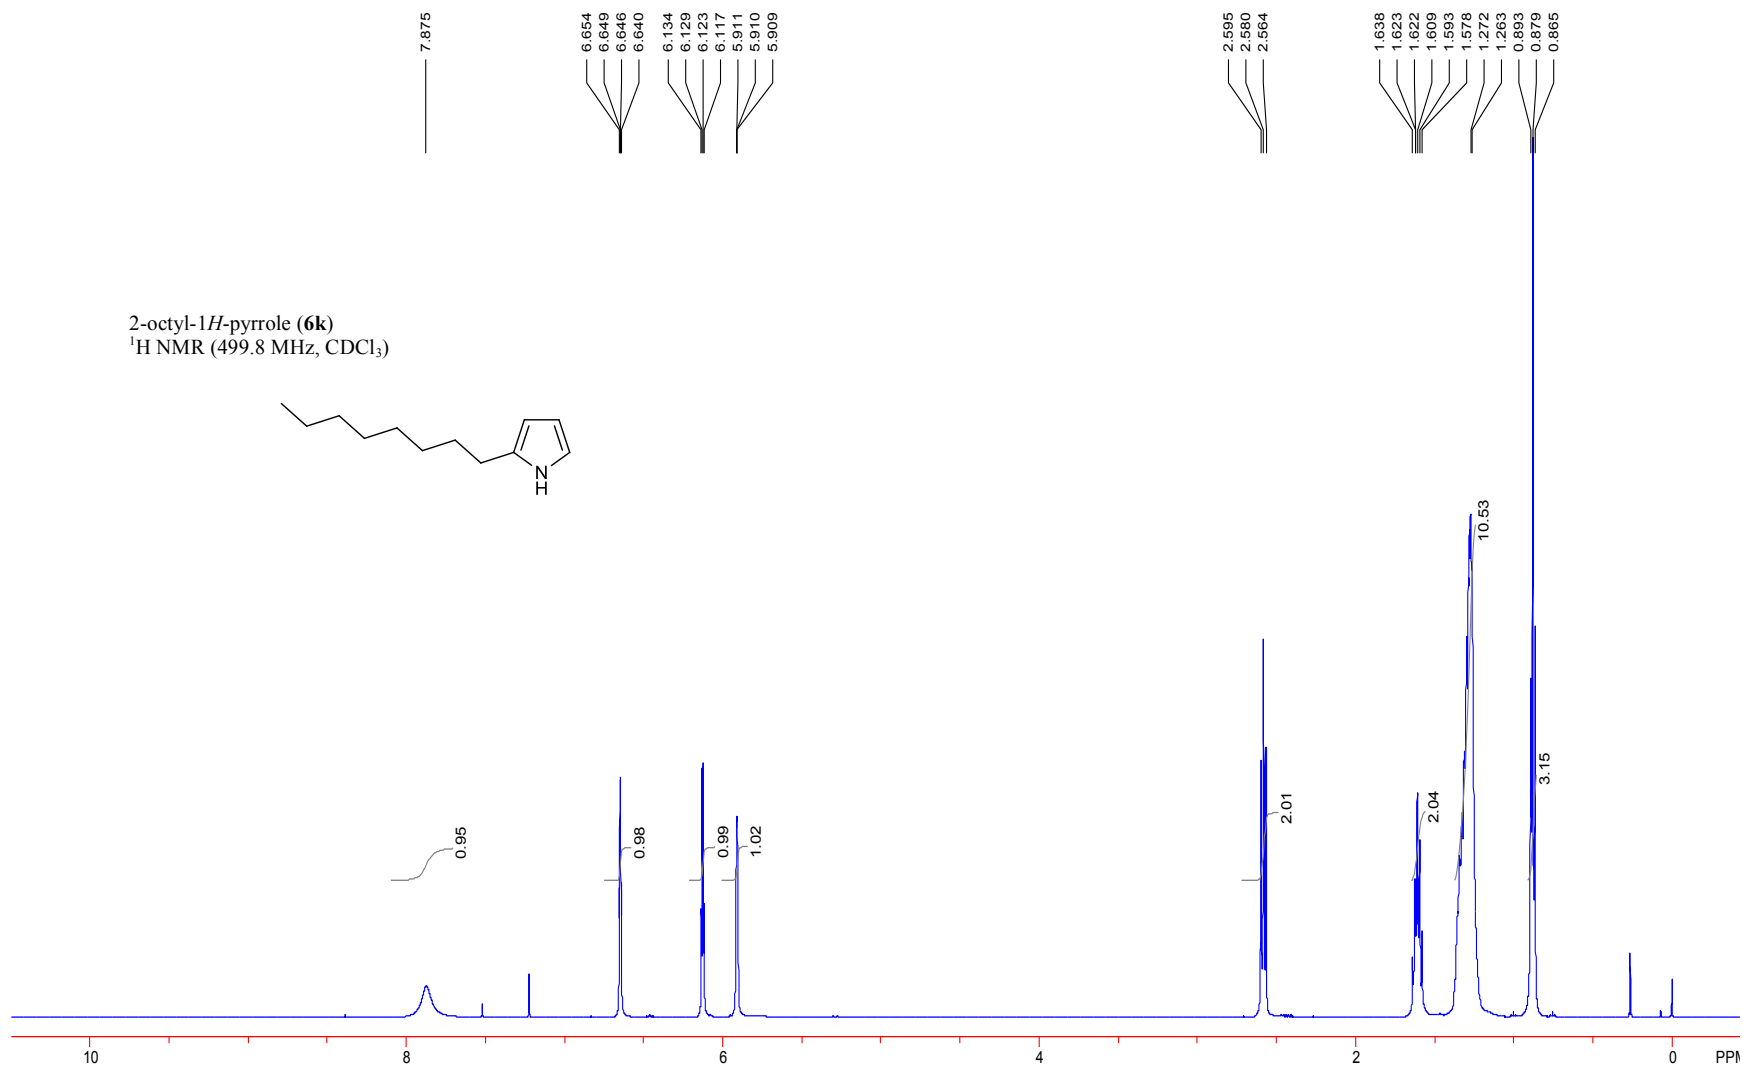

2-octyl-1H-pyrrole (**6k**)  
<sup>13</sup>C NMR (125.7 MHz, CDCl<sub>3</sub>)

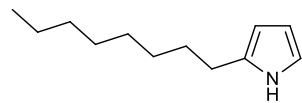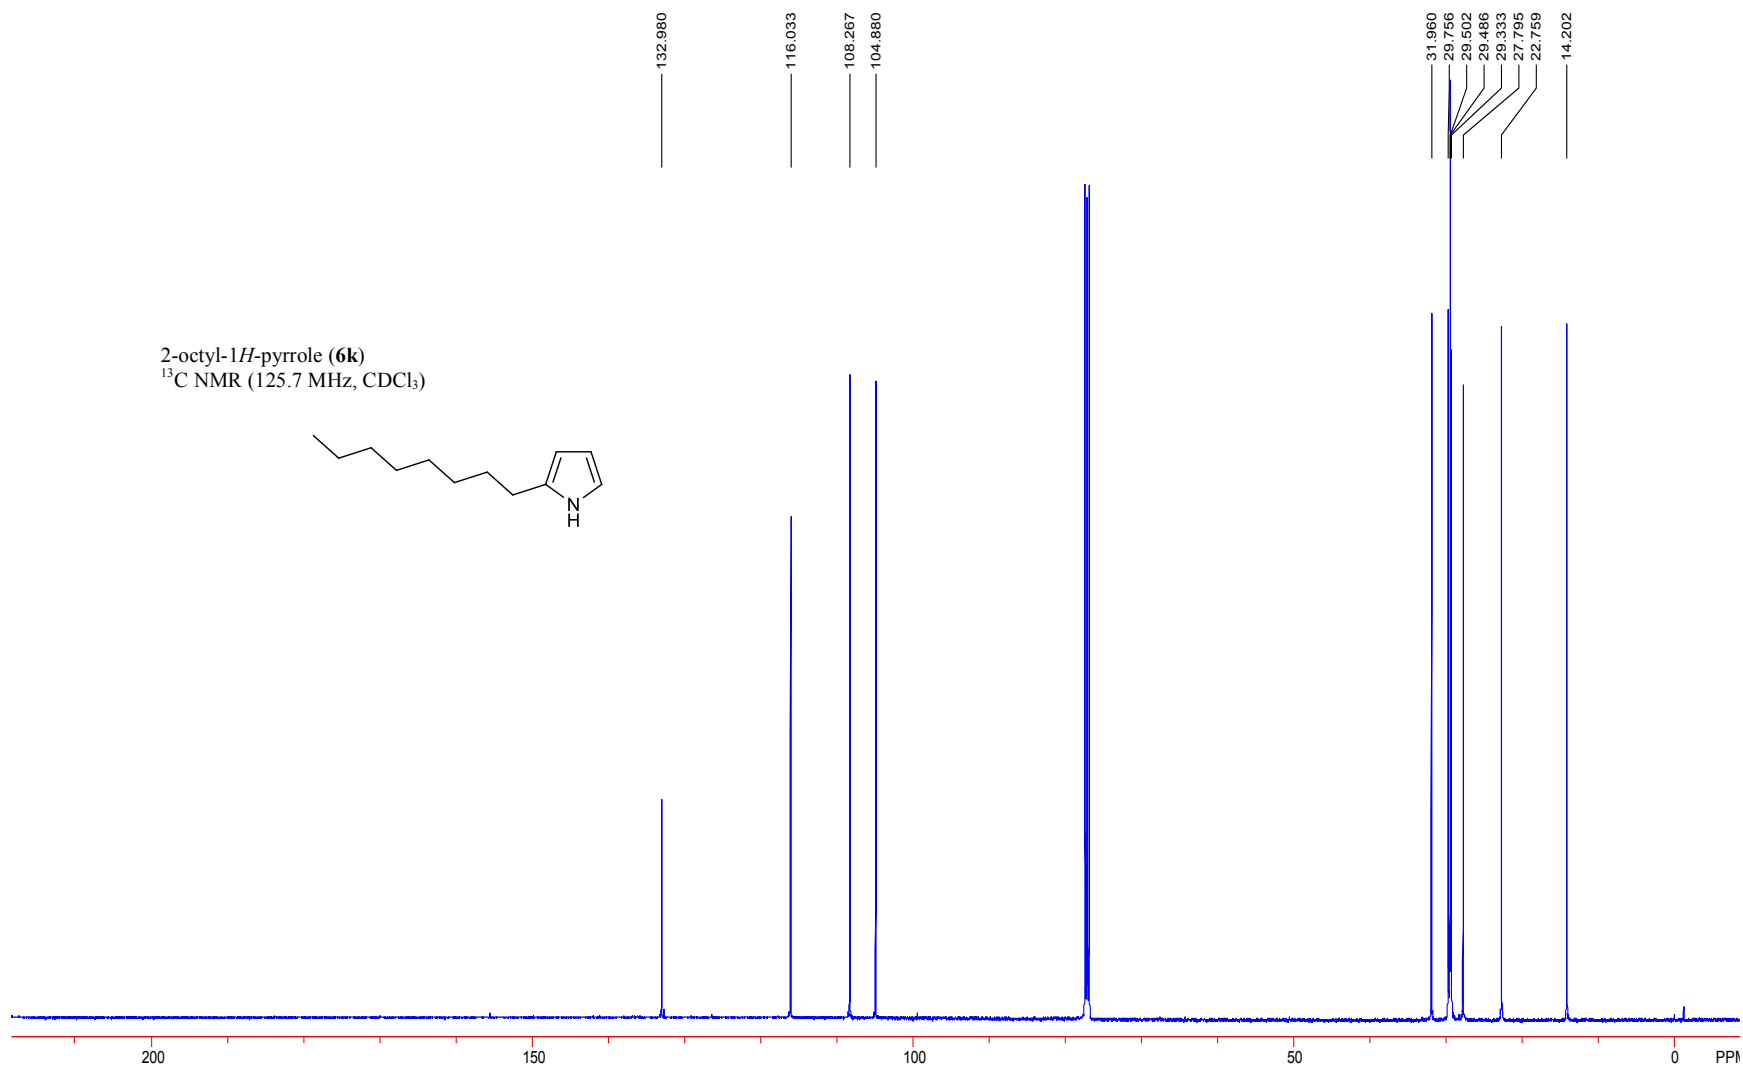

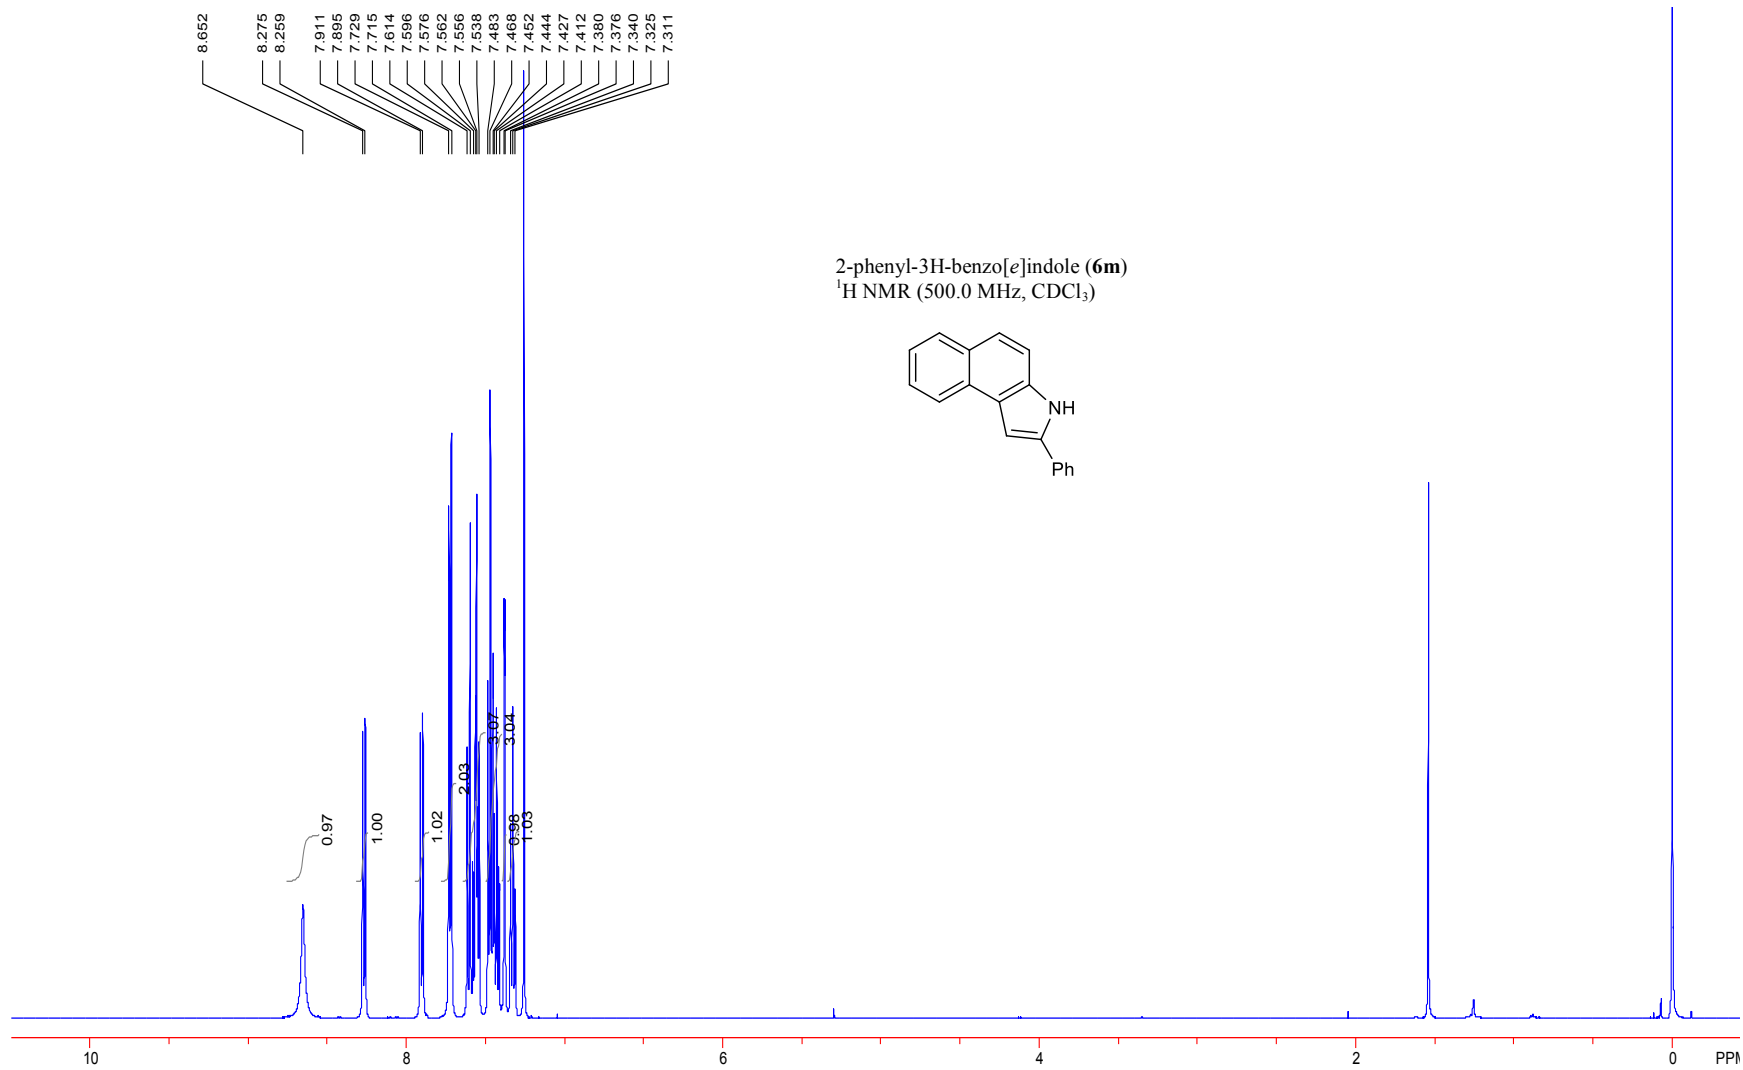



2-phenyl-3H-benzo[e]indole (**6m**)  
<sup>13</sup>C NMR (125.7 MHz, CDCl<sub>3</sub>)

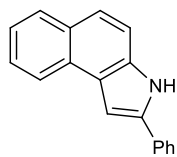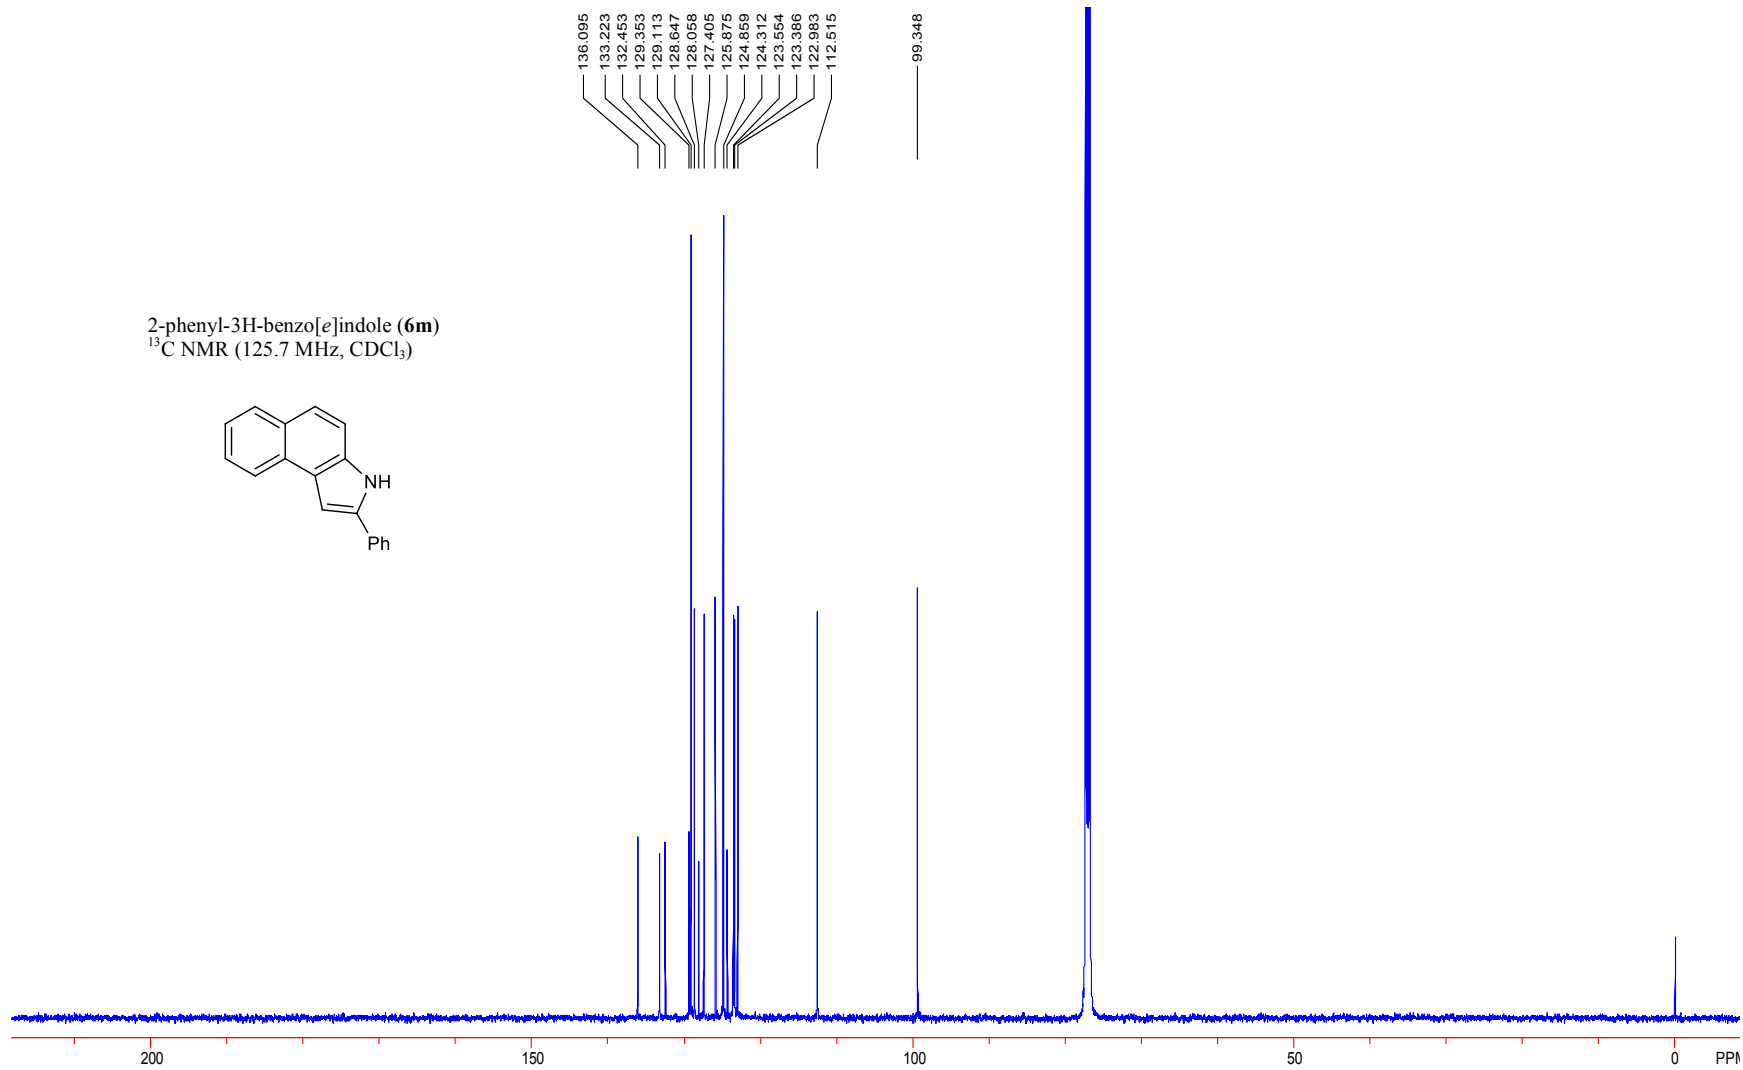

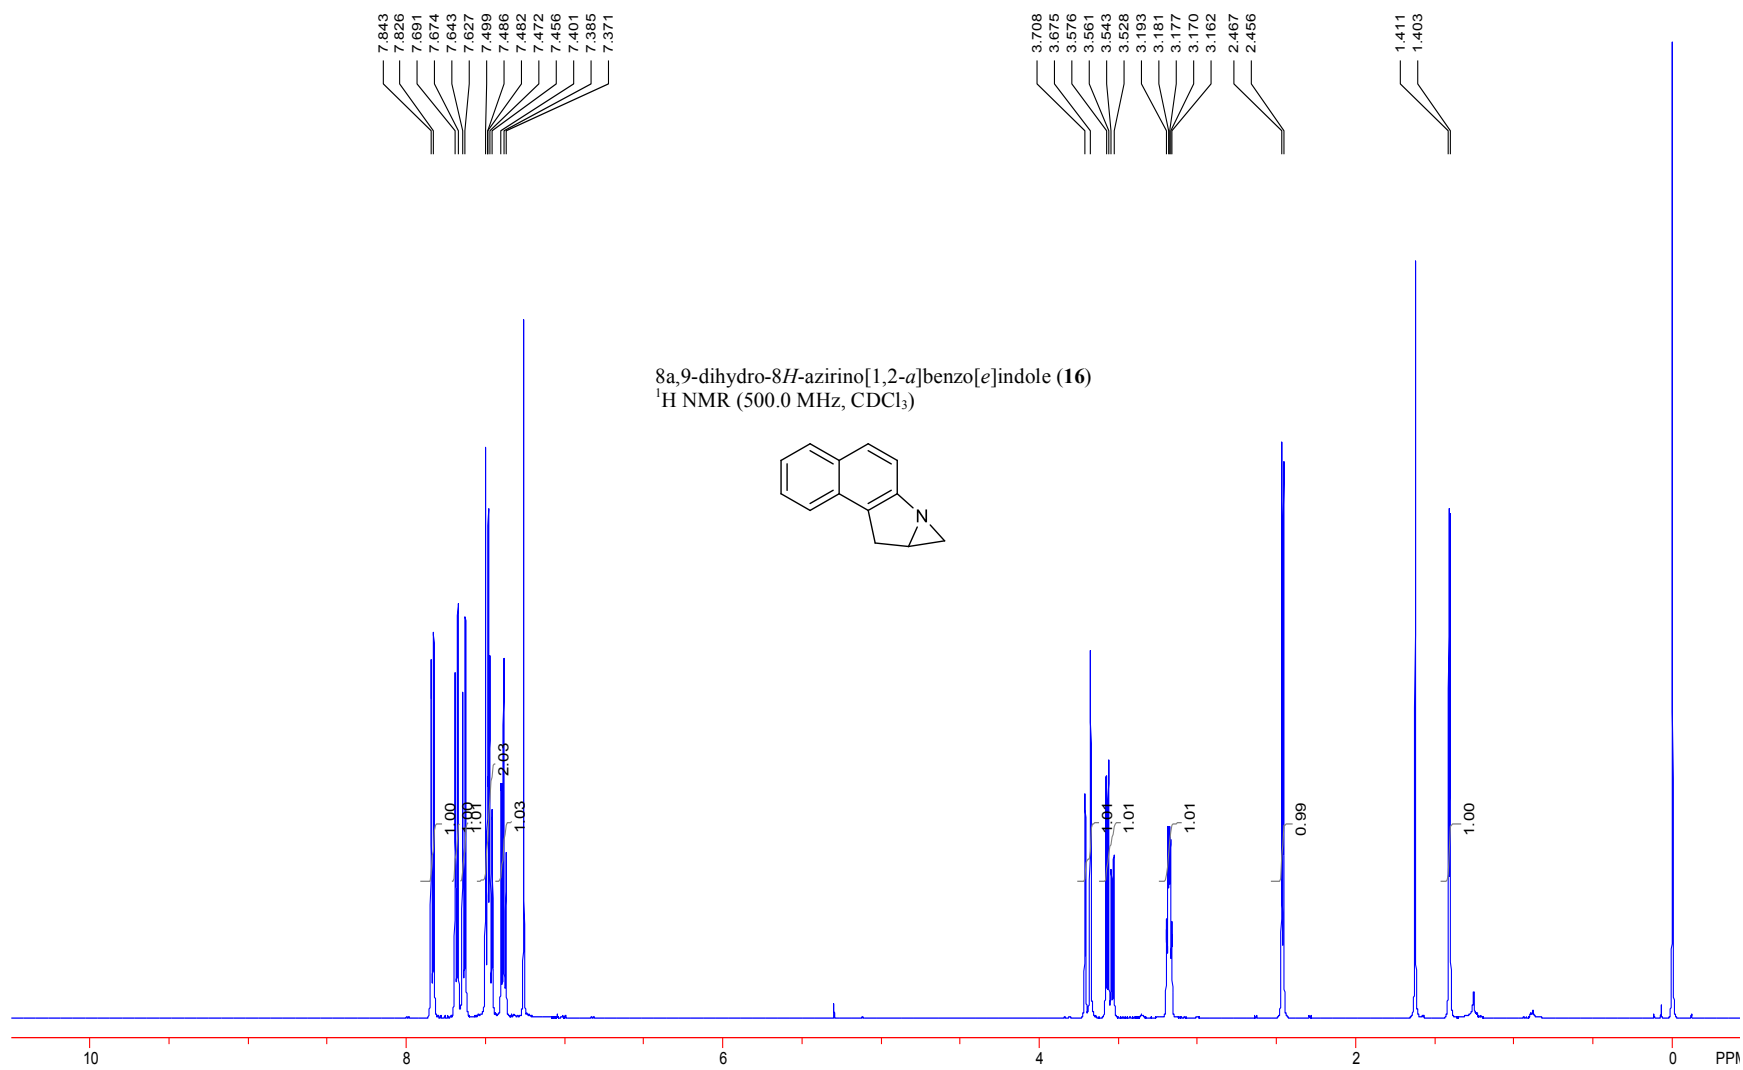

8a,9-dihydro-8*H*-azirino[1,2-*a*]benzo[*e*]indole (**16**)  
<sup>13</sup>C NMR (125.7 MHz, CDCl<sub>3</sub>)

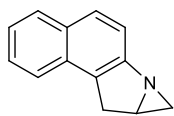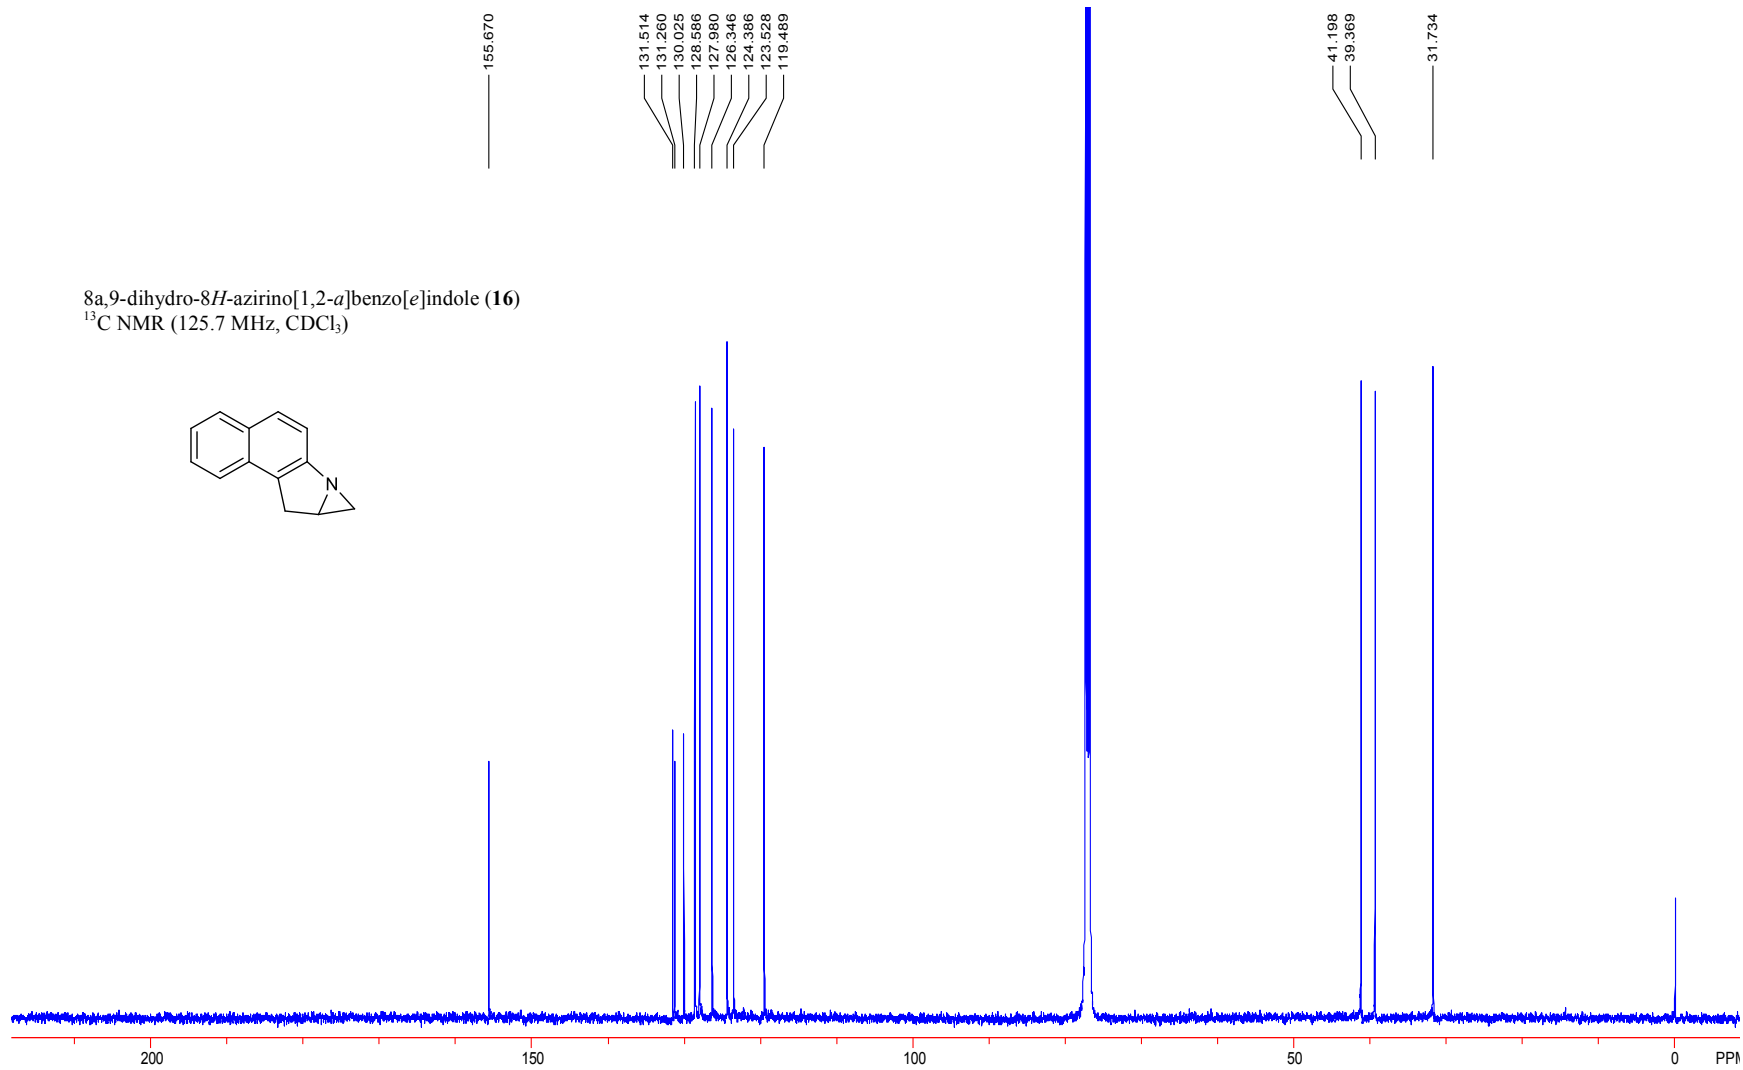

Methyl 3-((*E*)-prop-1-en-1-yl)-2-azatricyclo[3.2.1.0<sup>2,4</sup>]oct-6-ene-4-carboxylate (7)  
<sup>1</sup>H NMR (500.0 MHz, CDCl<sub>3</sub>)

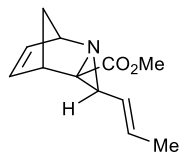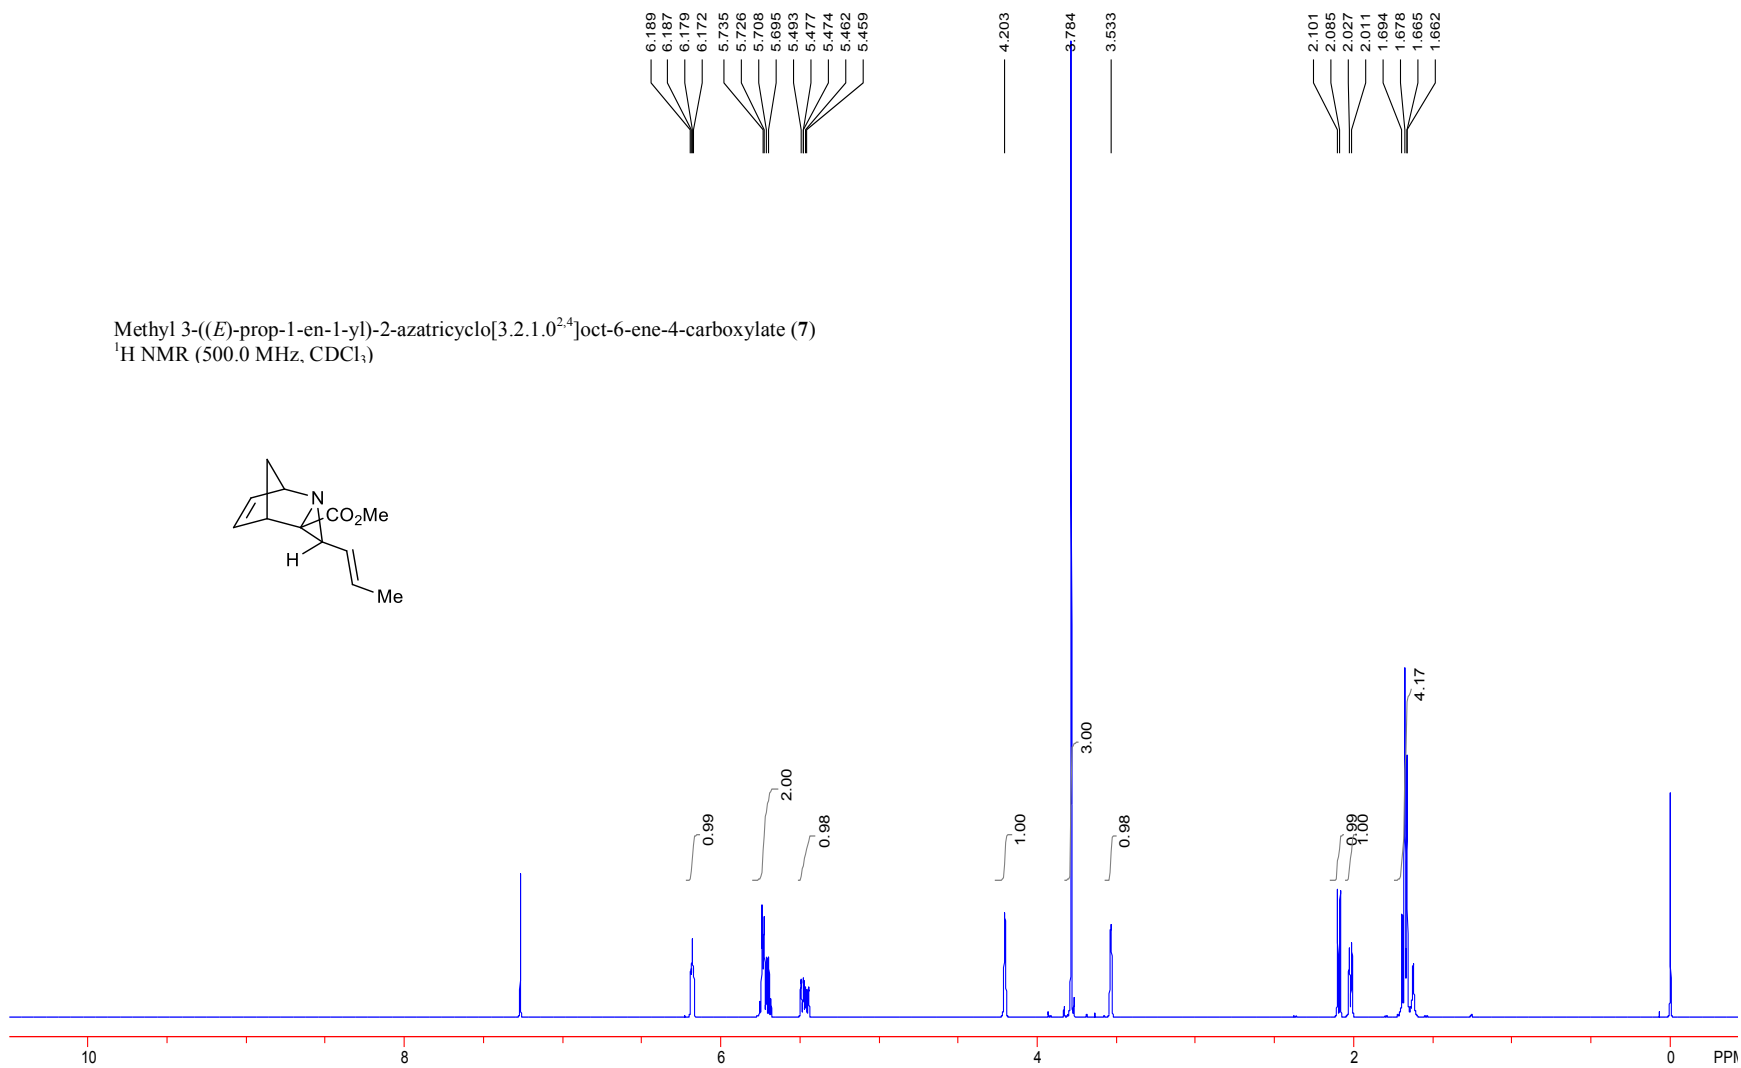

Methyl 3-((*E*)-prop-1-en-1-yl)-2-azatricyclo[3.2.1.0<sup>2,4</sup>]oct-6-ene-4-carboxylate (7)  
<sup>13</sup>C NMR (125.7 MHz, CDCl<sub>3</sub>)

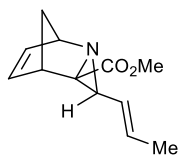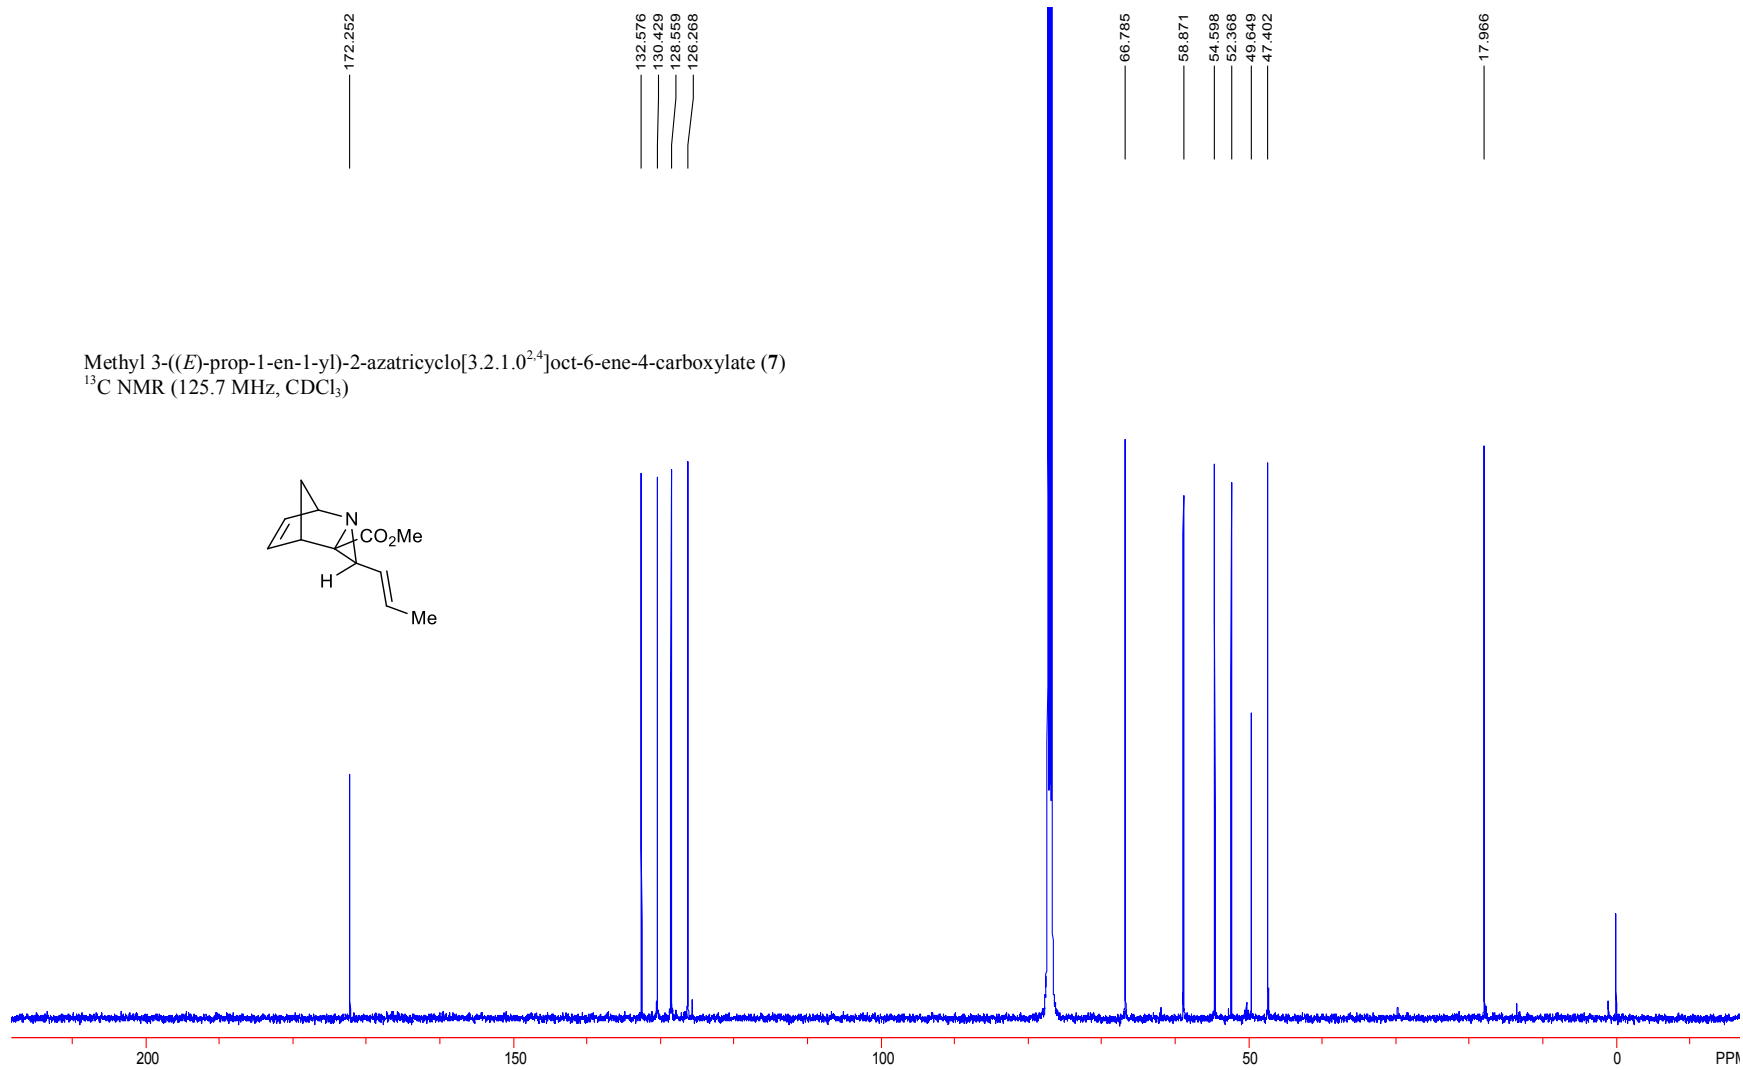

Methyl 3-(2,6-dichlorophenyl)aziridine-2-carboxylate (**10**)  
<sup>1</sup>H NMR (500.0 MHz, CDCl<sub>3</sub>)

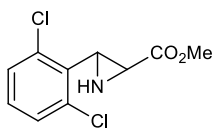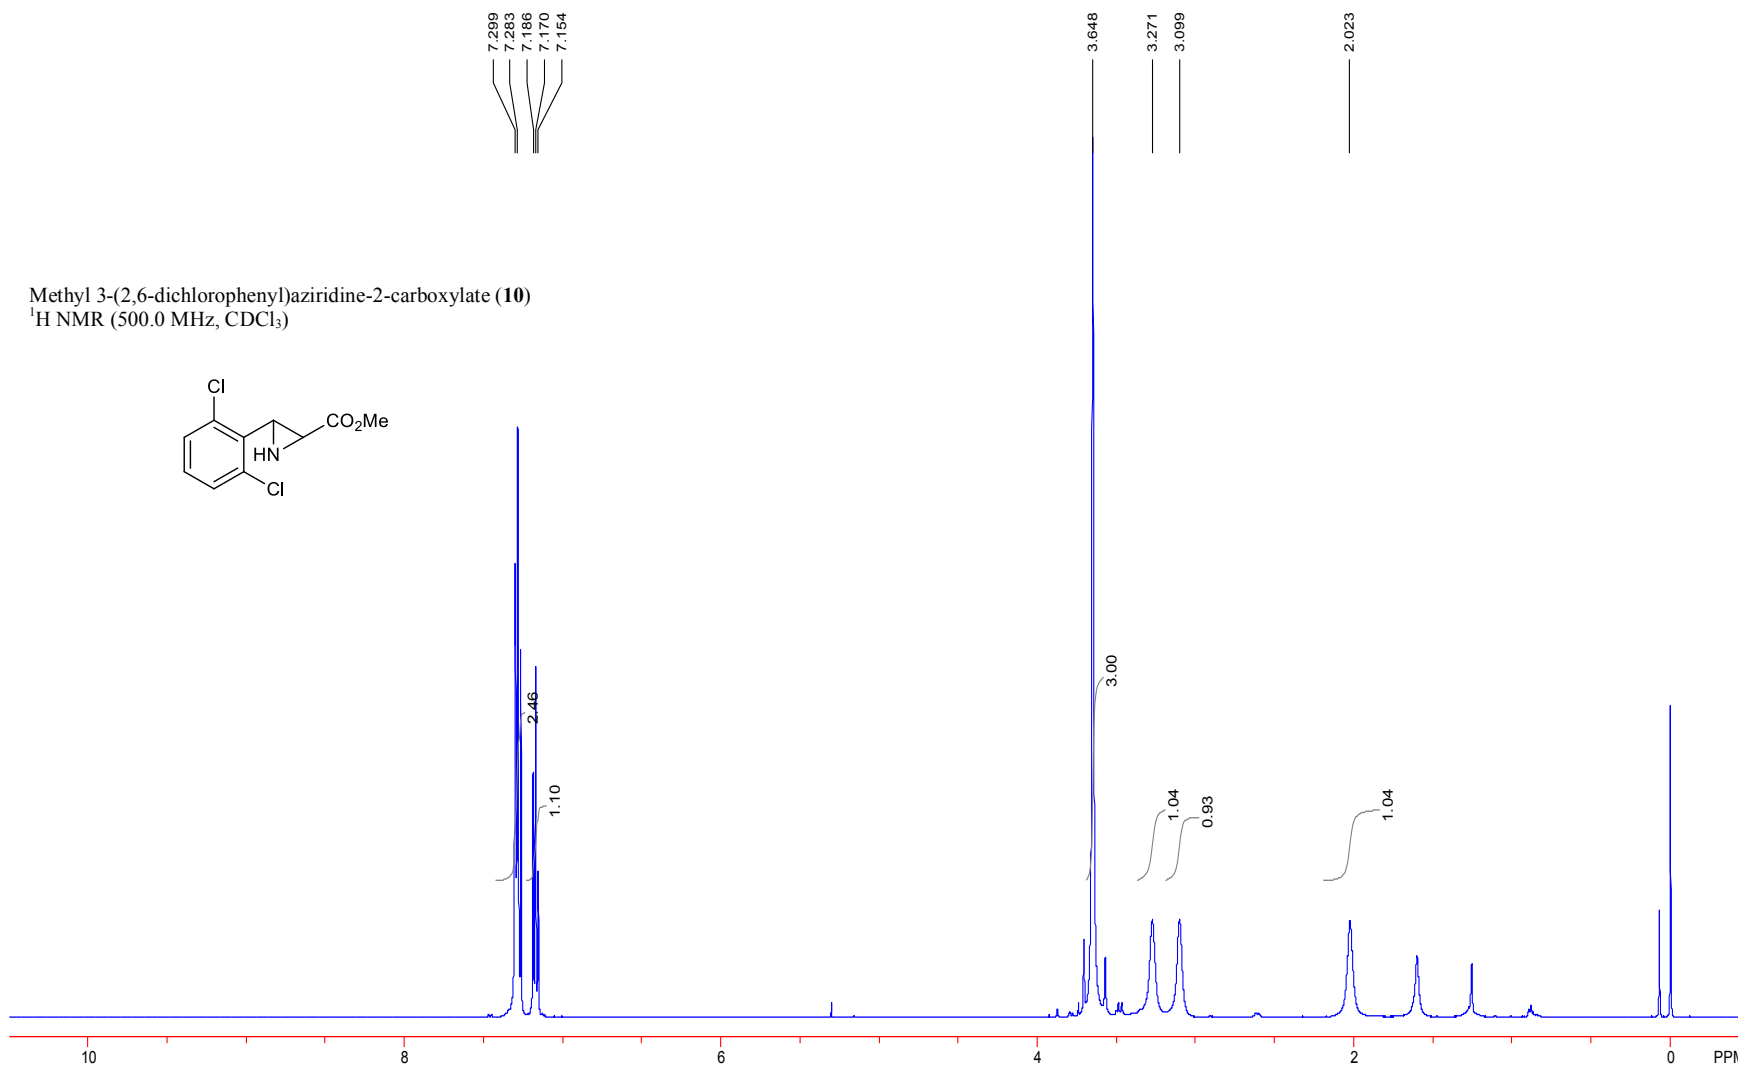

Methyl 3-(2,6-dichlorophenyl)aziridine-2-carboxylate (**10**)  
<sup>13</sup>C NMR (125.7MHz, CDCl<sub>3</sub>)

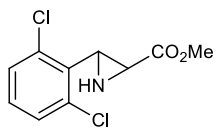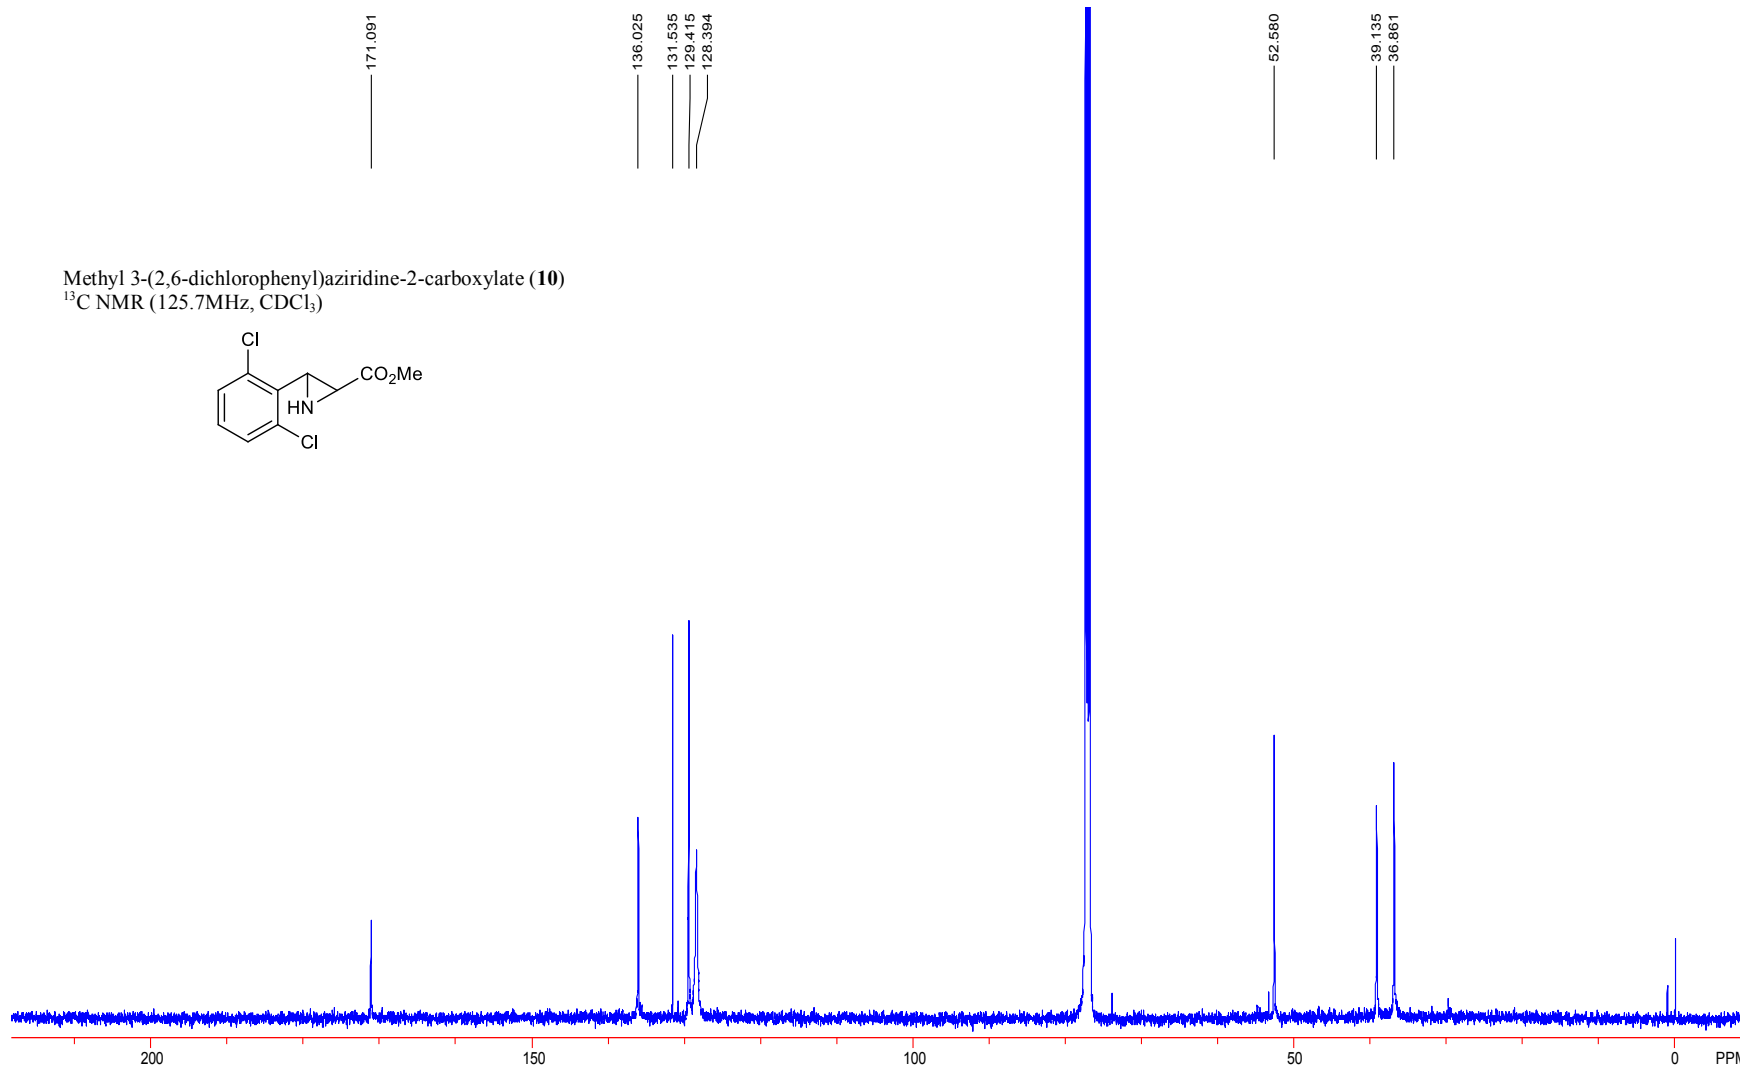

Methyl 3-(2,6-dichlorophenyl)-2-methoxyaziridine-2-carboxylate (**11**)  
<sup>1</sup>H NMR (500.0 MHz, CDCl<sub>3</sub>)

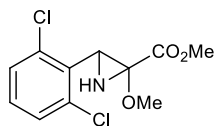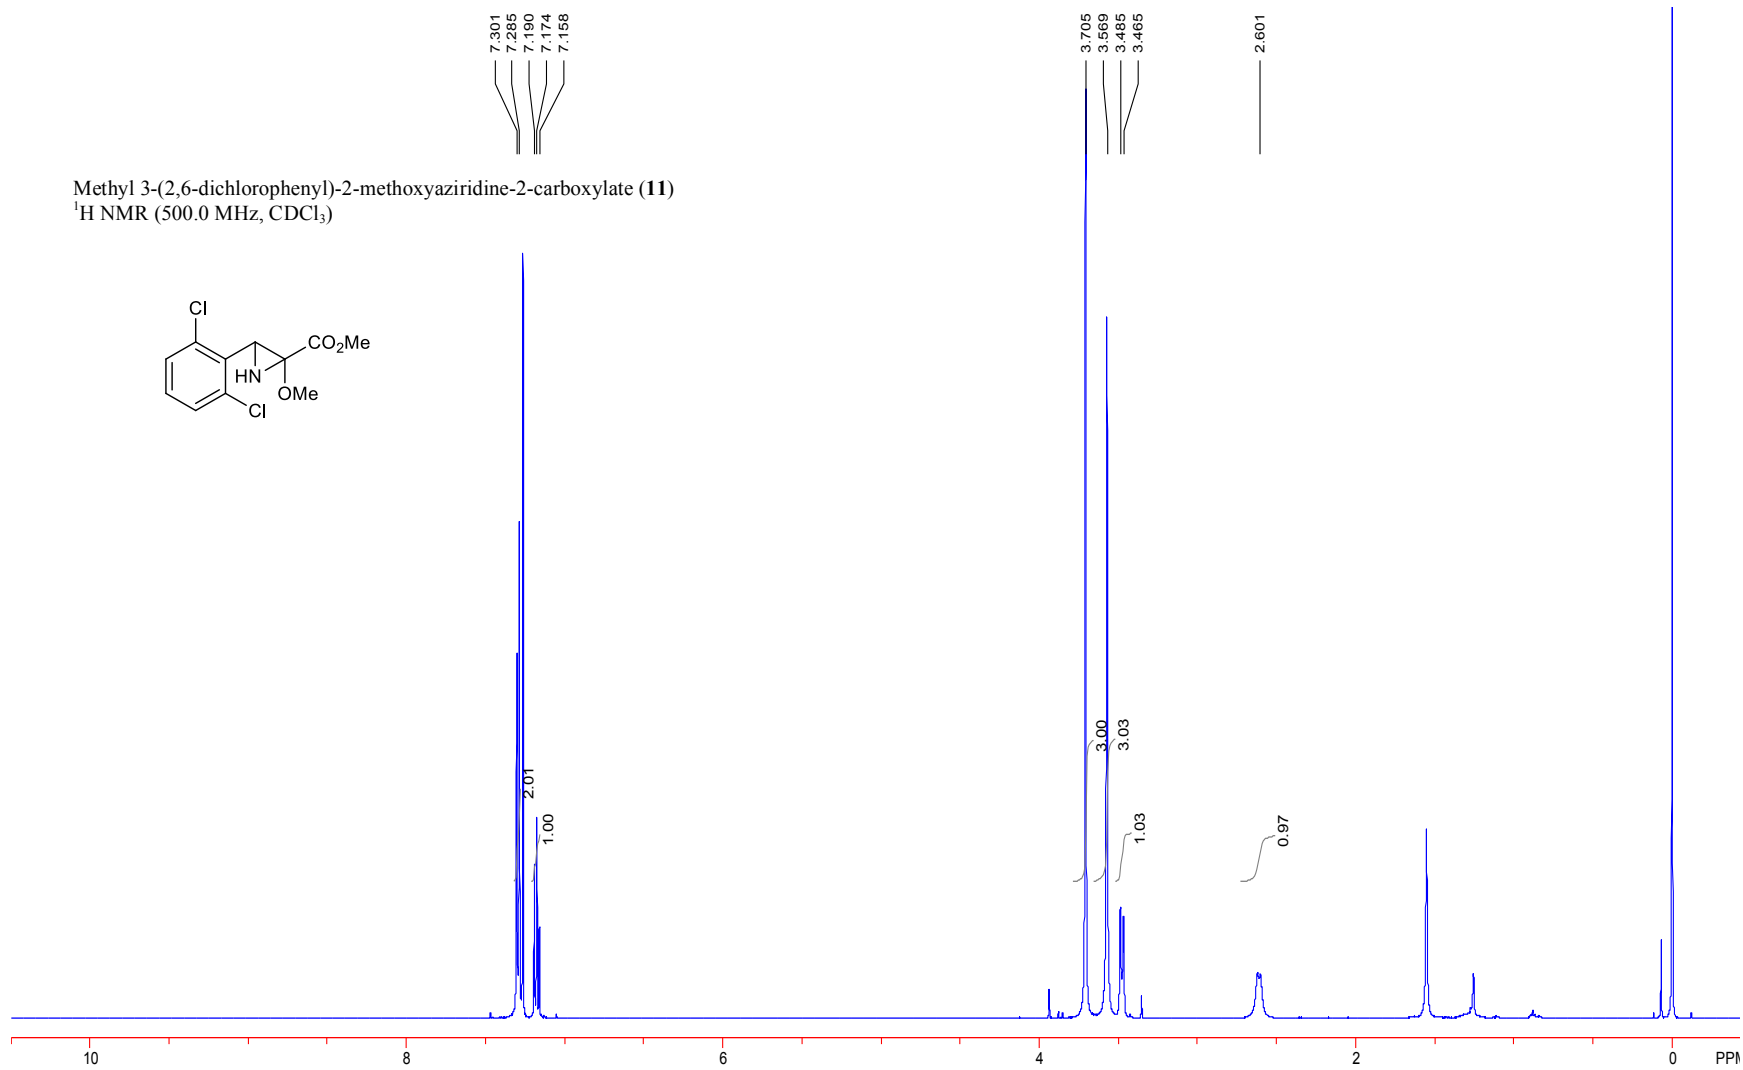



Methyl 3-(2,6-dichlorophenyl)-2-methoxyaziridine-2-carboxylate (**11**)  
<sup>13</sup>C NMR (125.7 MHz, CDCl<sub>3</sub>)

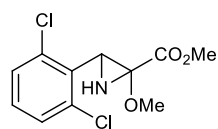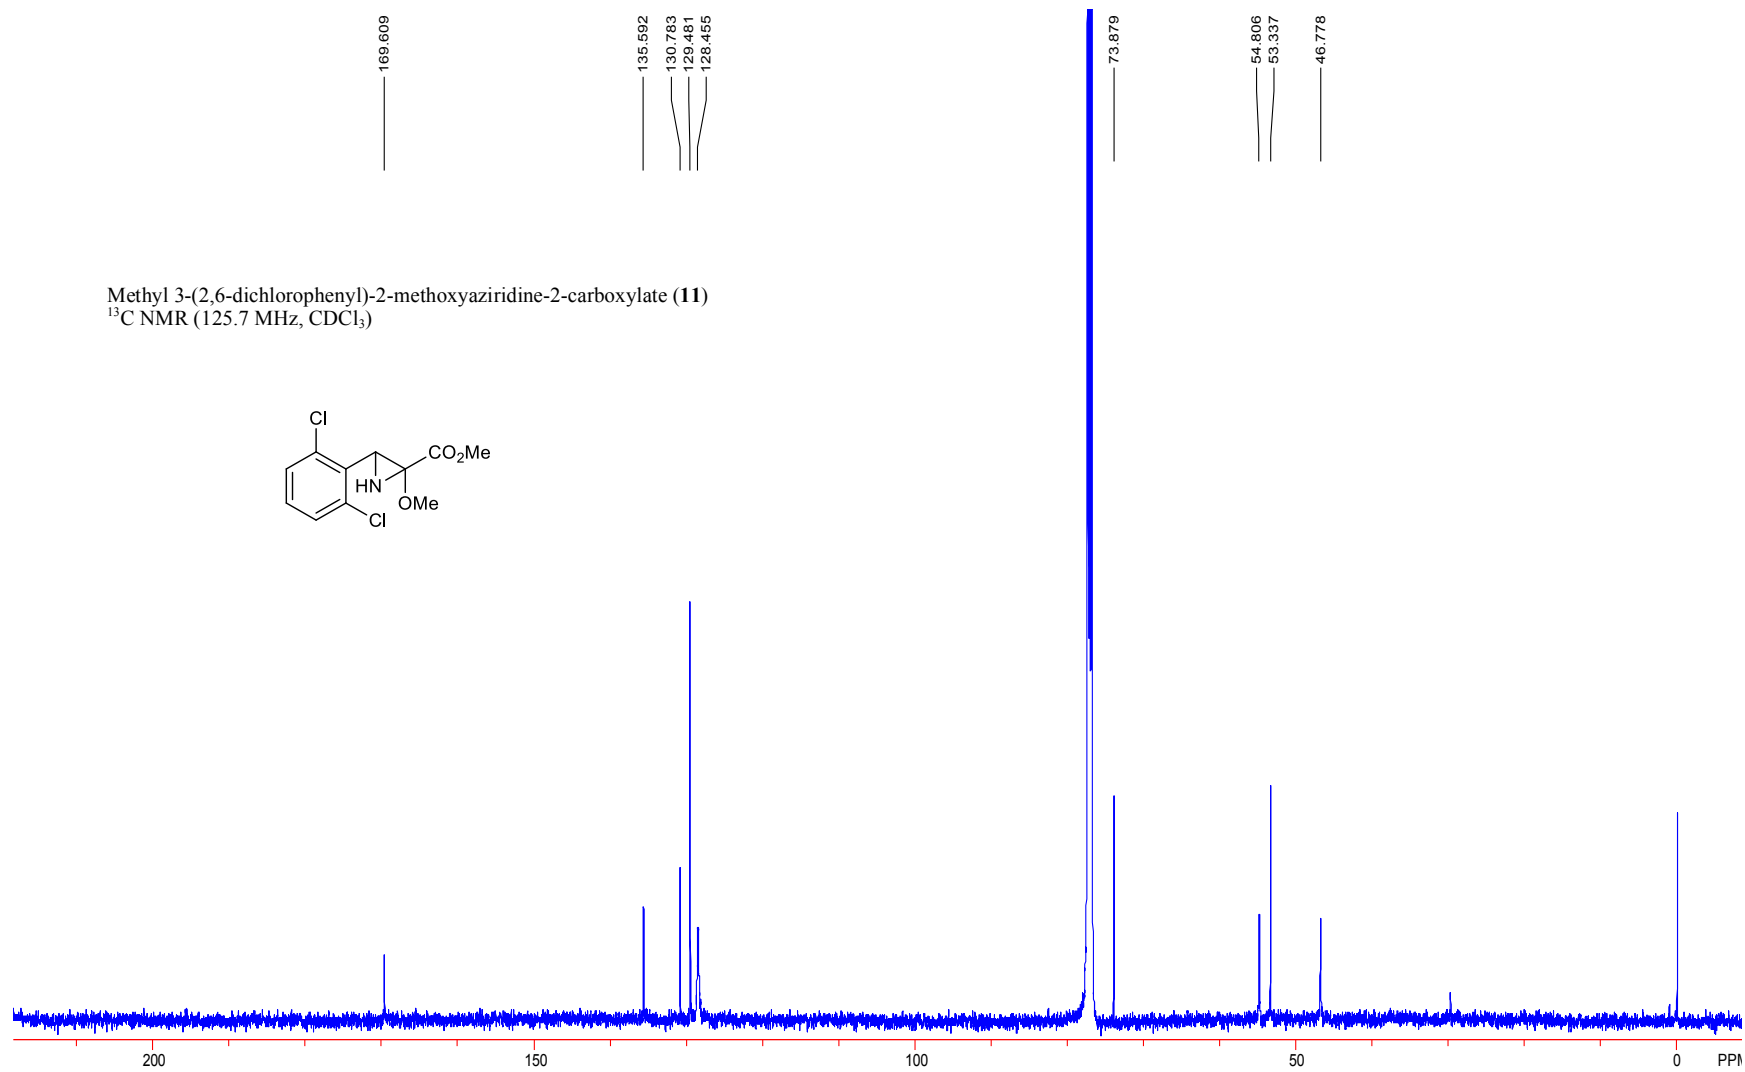

Methyl 2-(2,6-dichlorophenyl)-5-phenyl-1H-pyrrole-3-carboxylate (**14**)  
<sup>1</sup>H NMR (500.0 MHz, CDCl<sub>3</sub>)

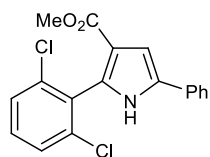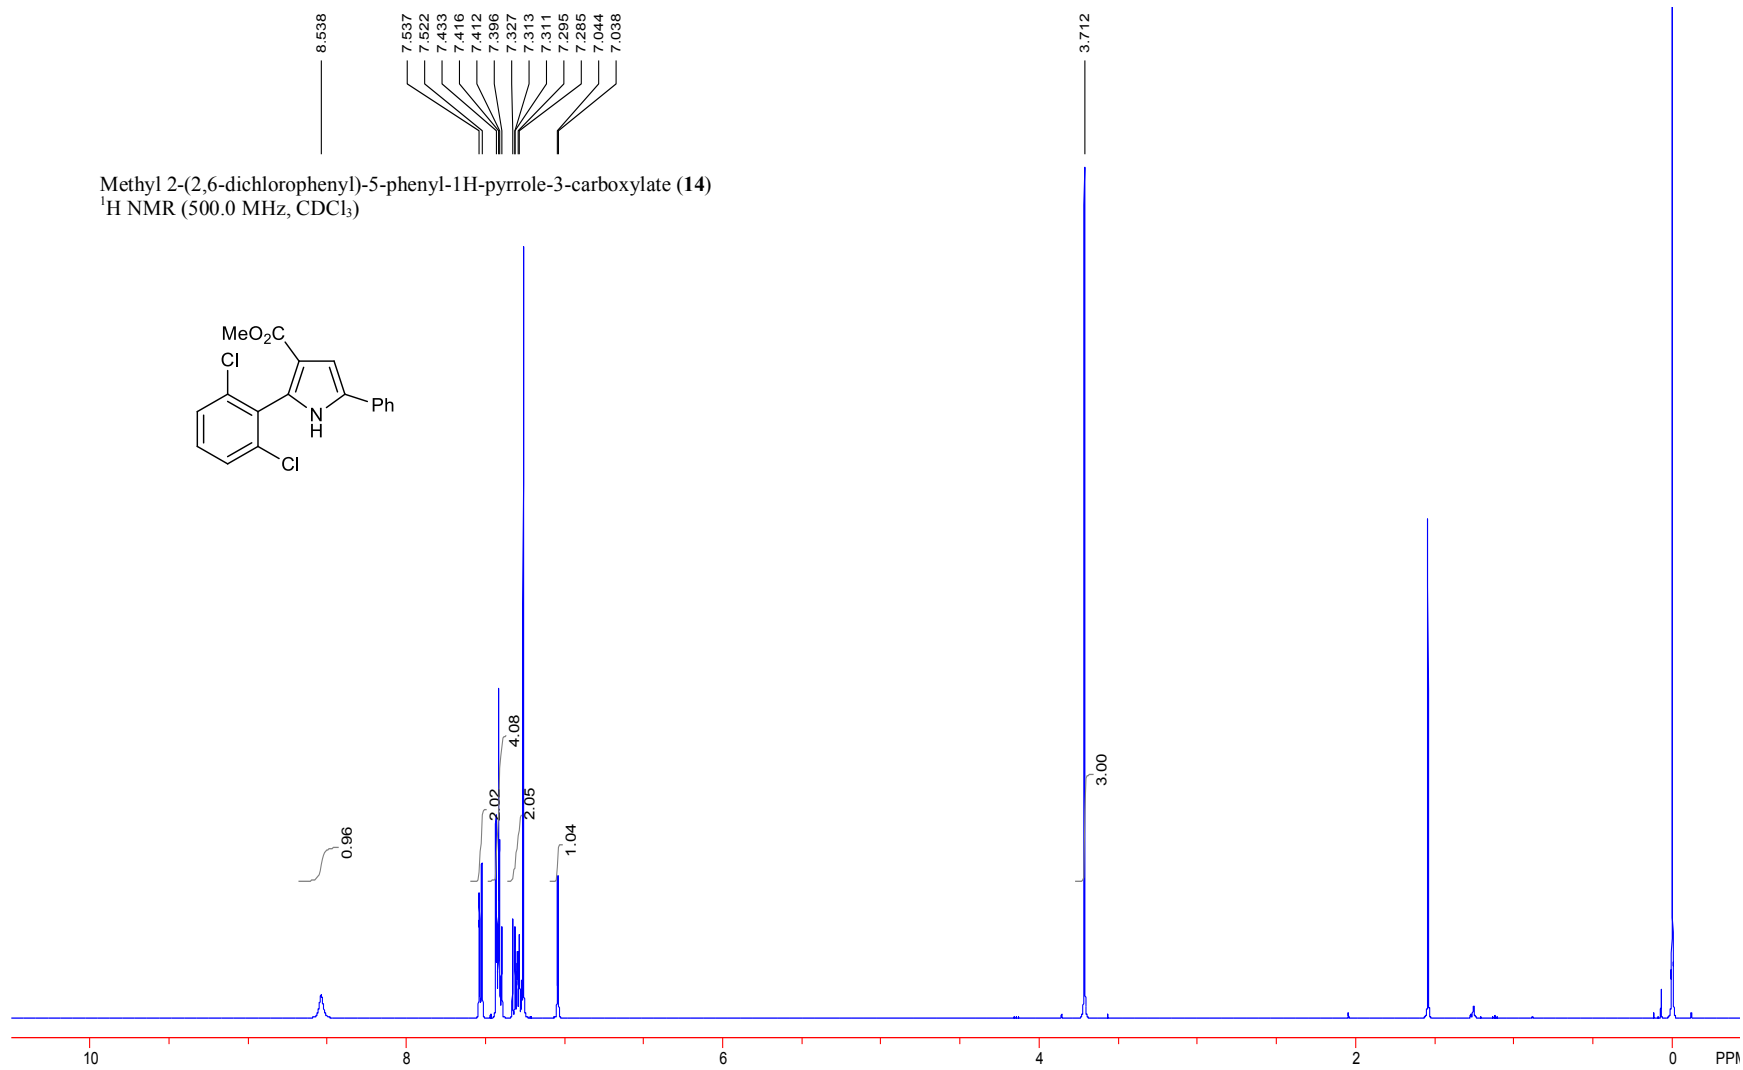

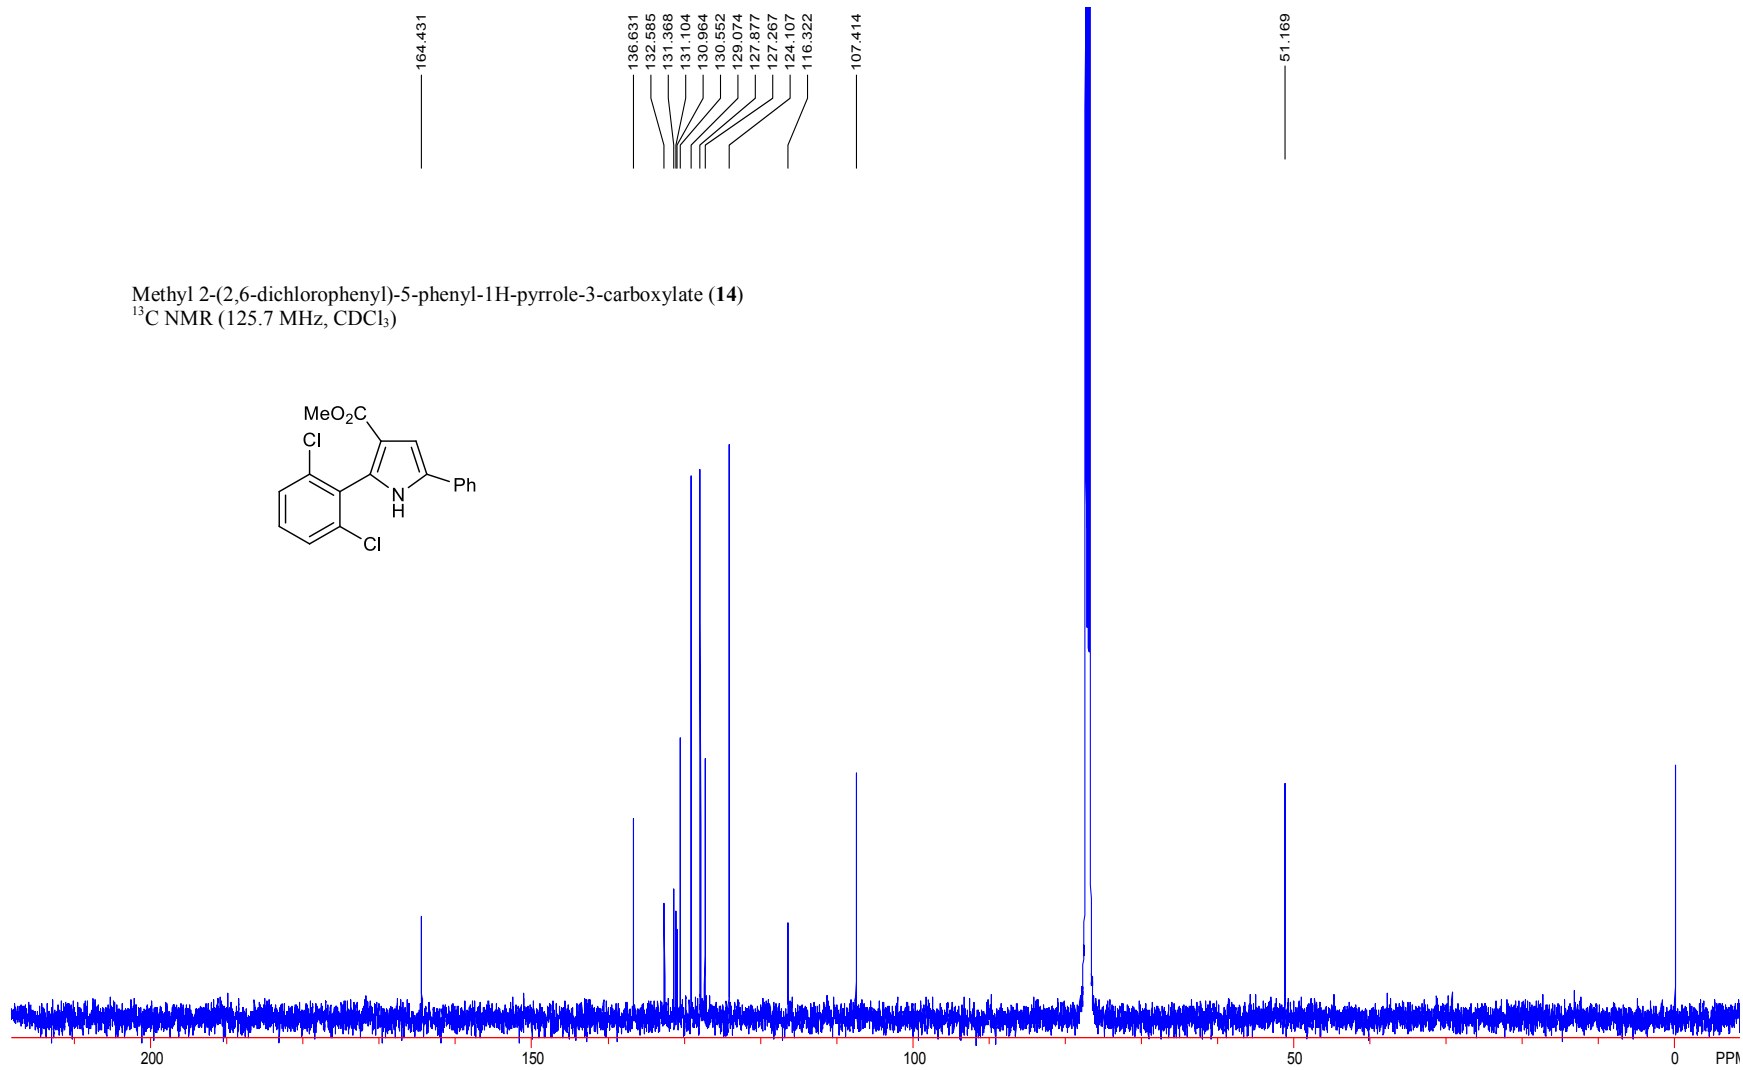

Supplement: NIHMS547960-supplement-Supporting_Information.pdf [file NIHMS547960-supplement-Supporting_Information.pdf]
